# Supplementary material for: Years of Life Lost due to Premature Mortality Following Sulfur Mustard Exposure: A Post-War National Burden of Disease Study (1988-2021)
Source: Research Square preprint supplement (doi:10.21203/rs.3.rs-7847427/v1), 2025-11-14
Supplement: Supplementary file 1 [file 774bfaae36841aaa83538a86.docx]

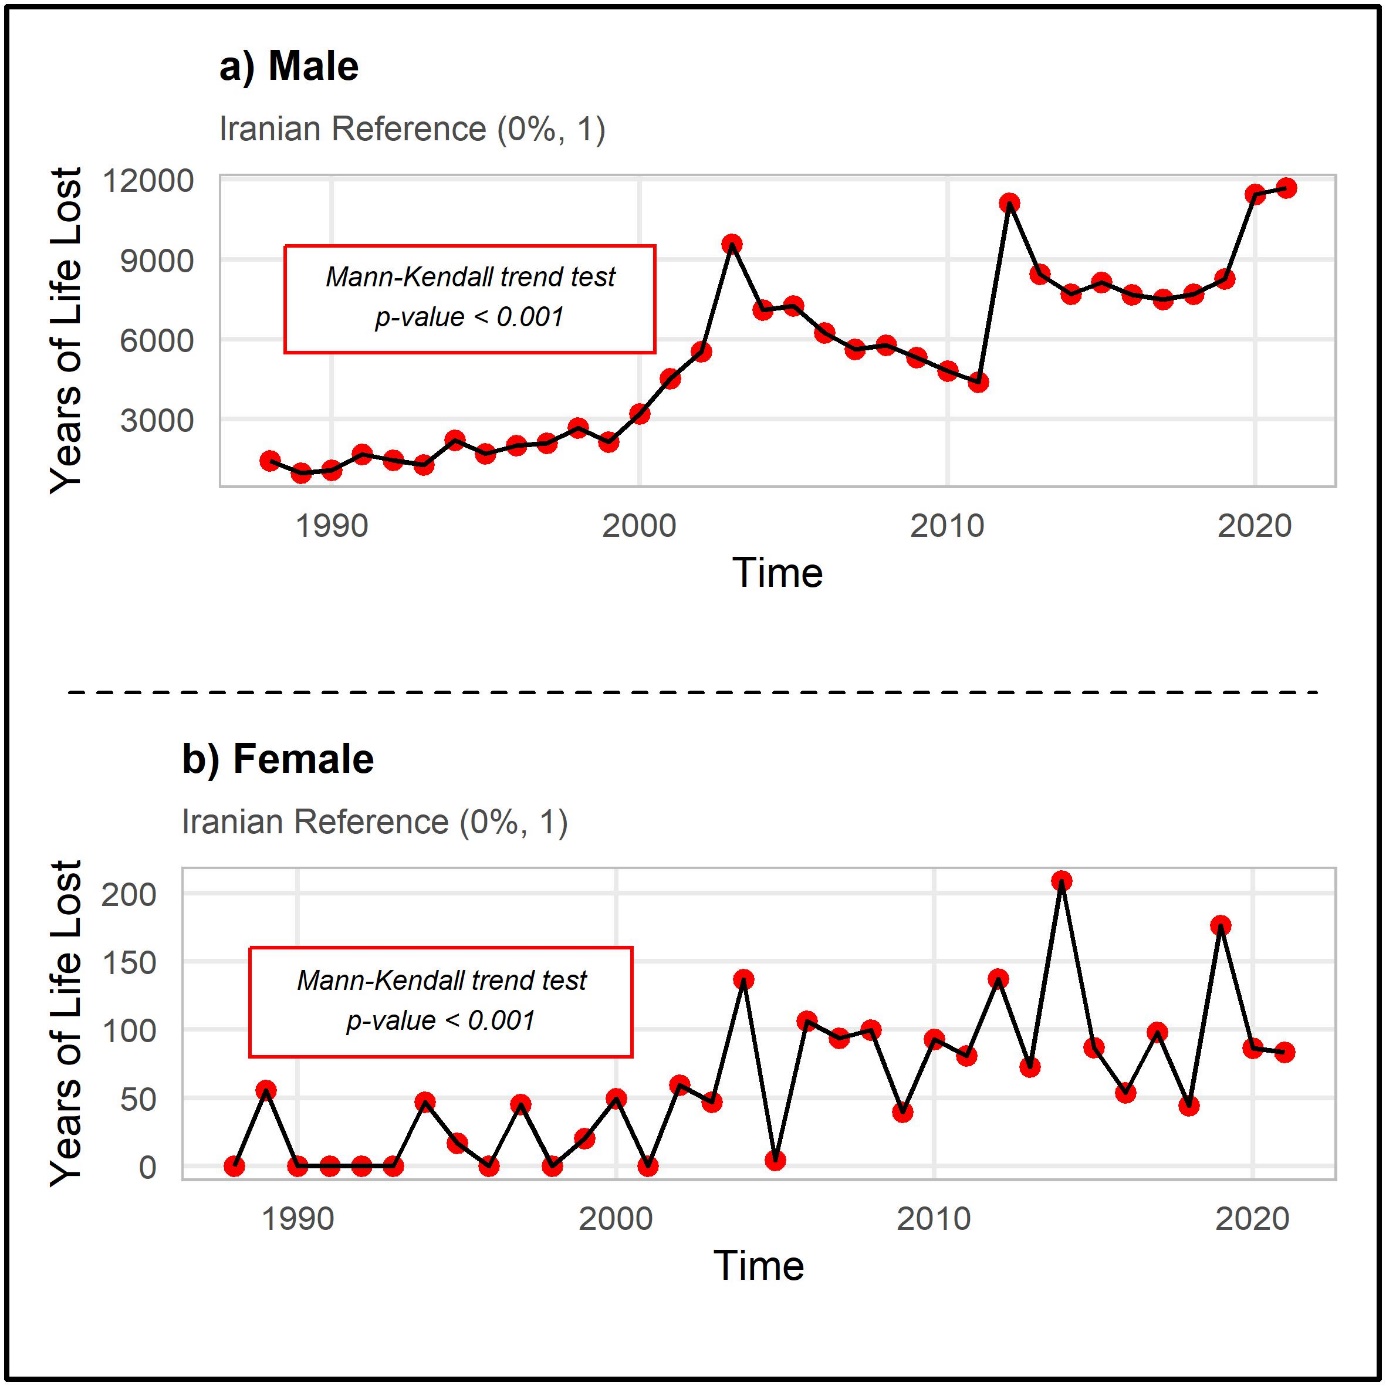


Supplementary Figure S1: Temporal Trends in Years of Life Lost by sex Using Iranian Reference (0%, 1)


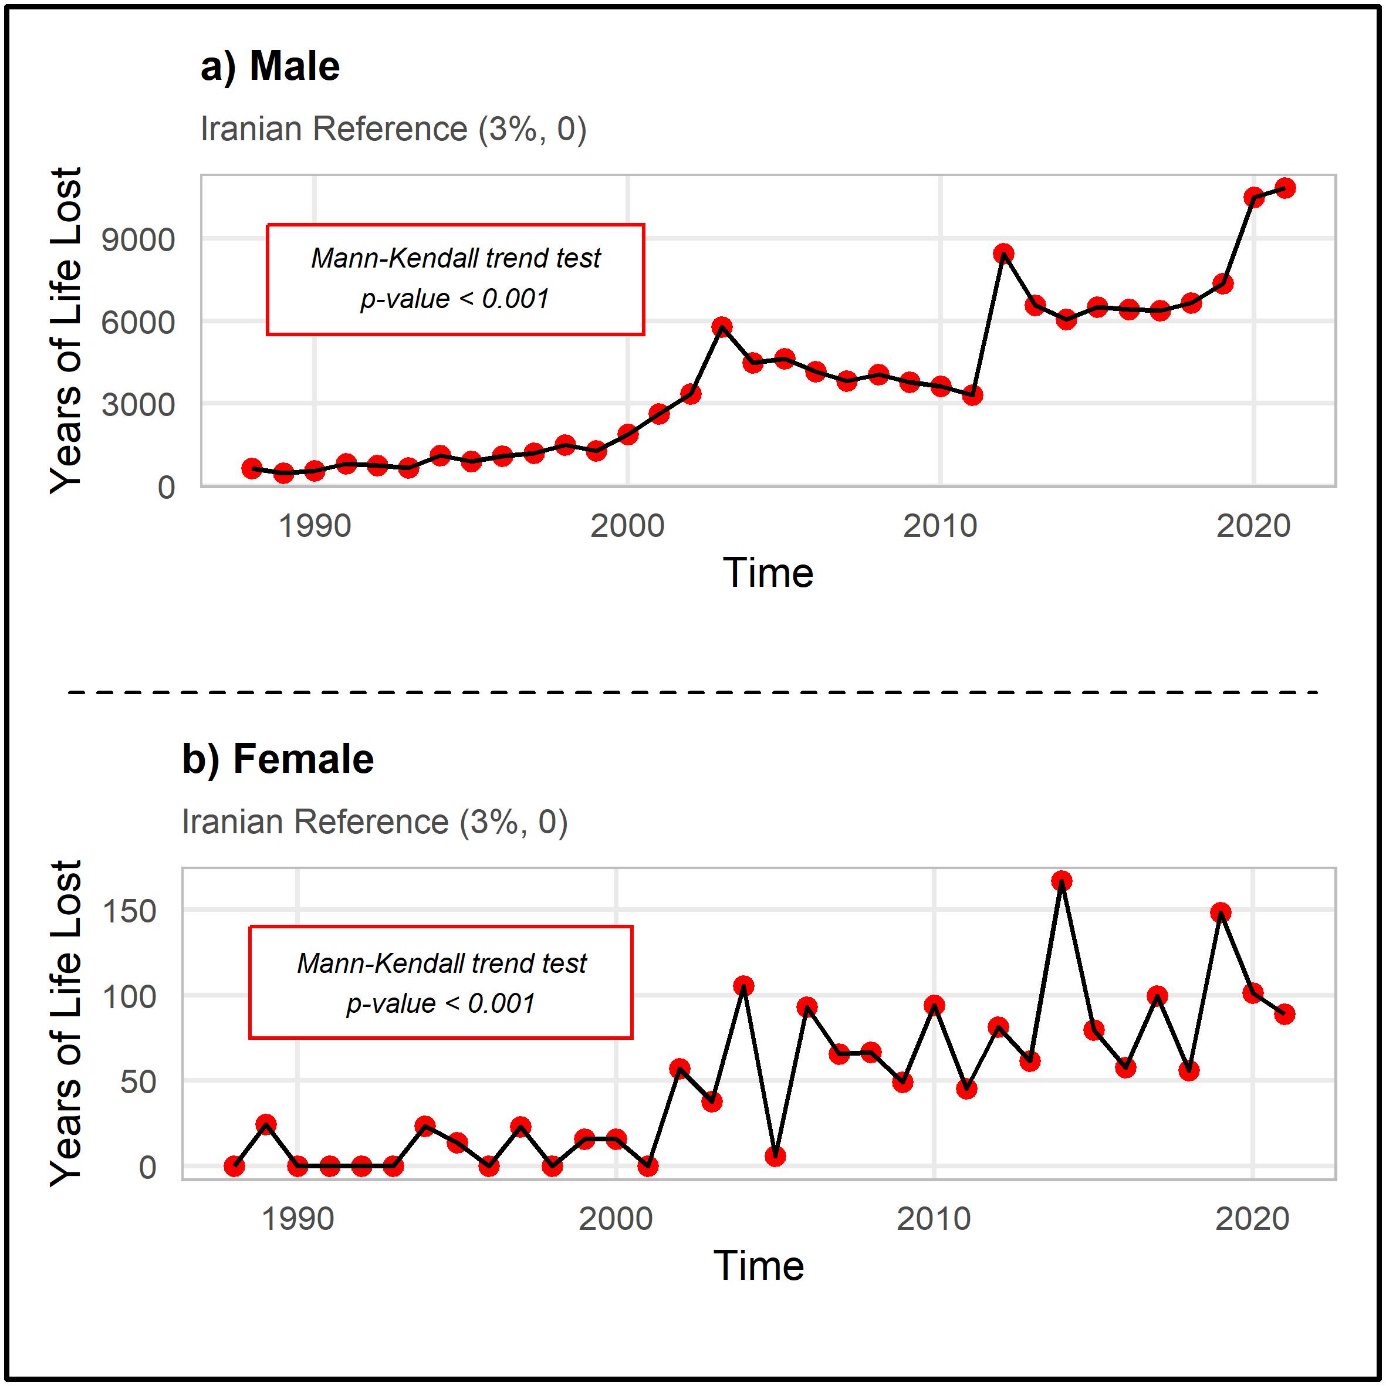


Supplementary Figure S2: Temporal Trends in Years of Life Lost by sex Using Iranian Reference (3%, 0)


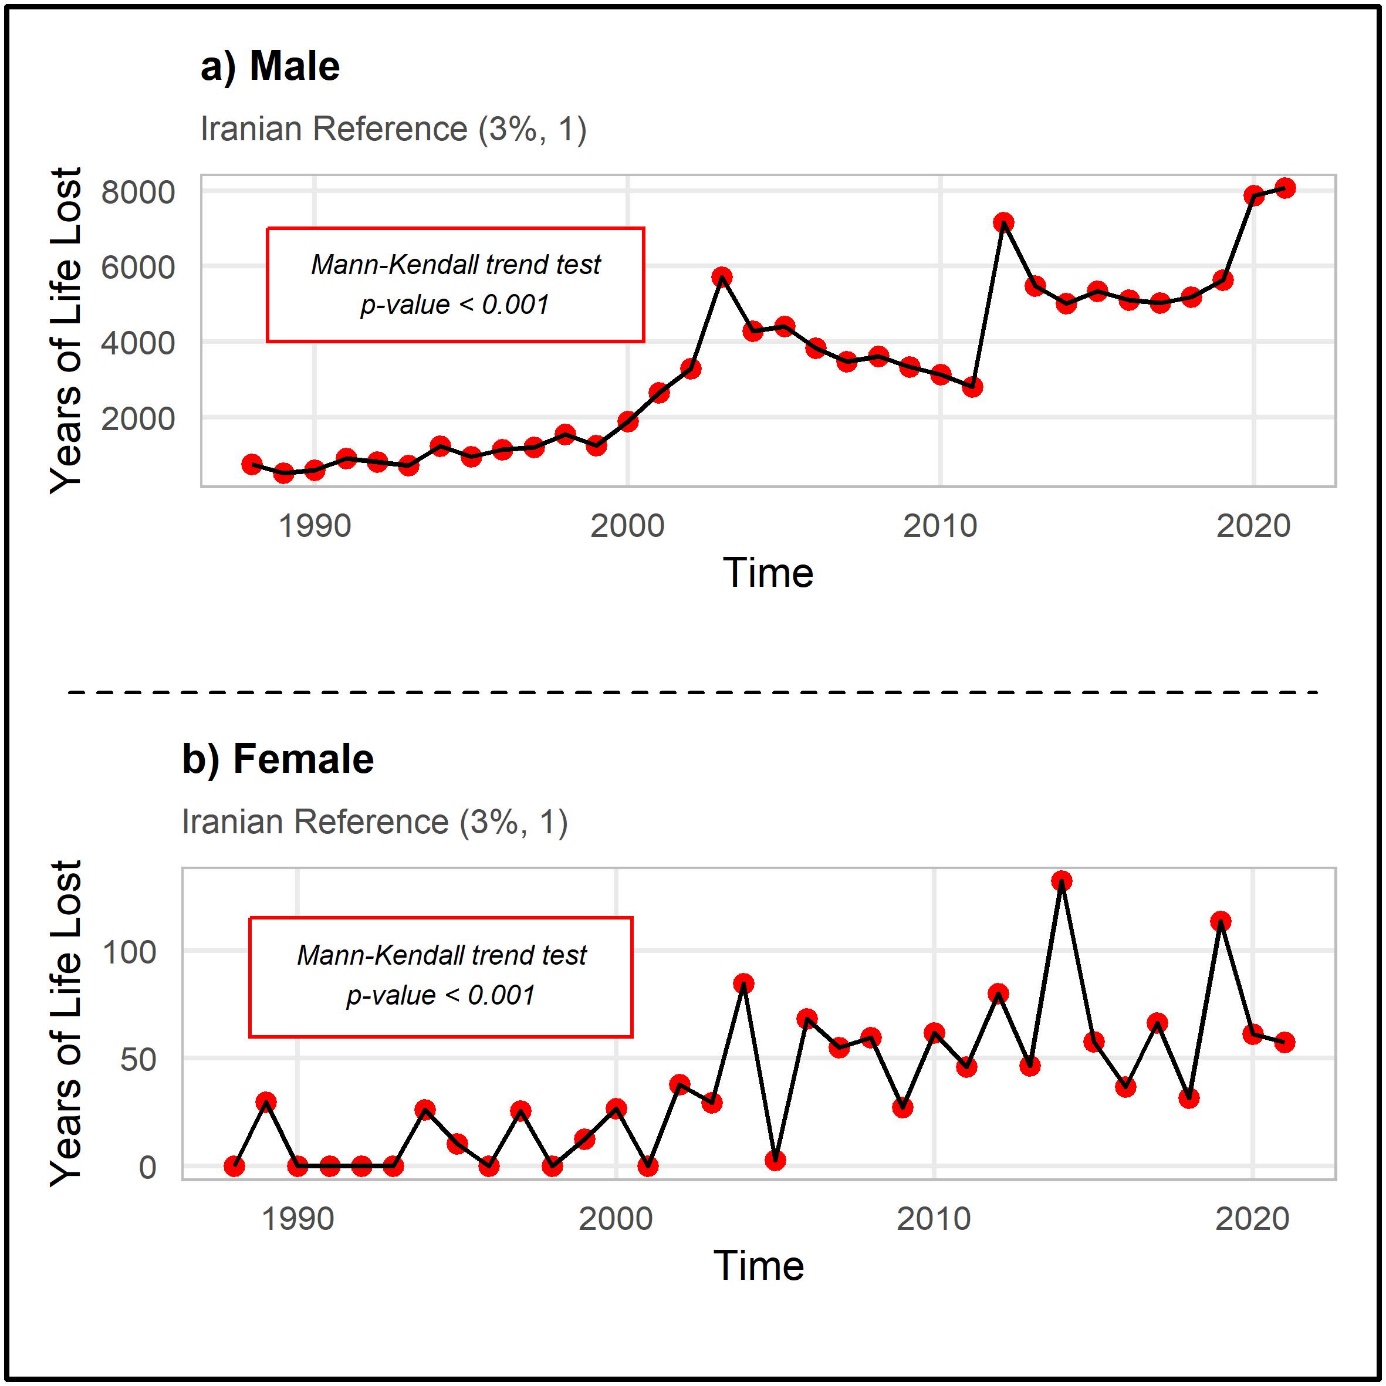


Supplementary Figure S3: Temporal Trends in Years of Life Lost by sex Using Iranian Reference (3%, 1)


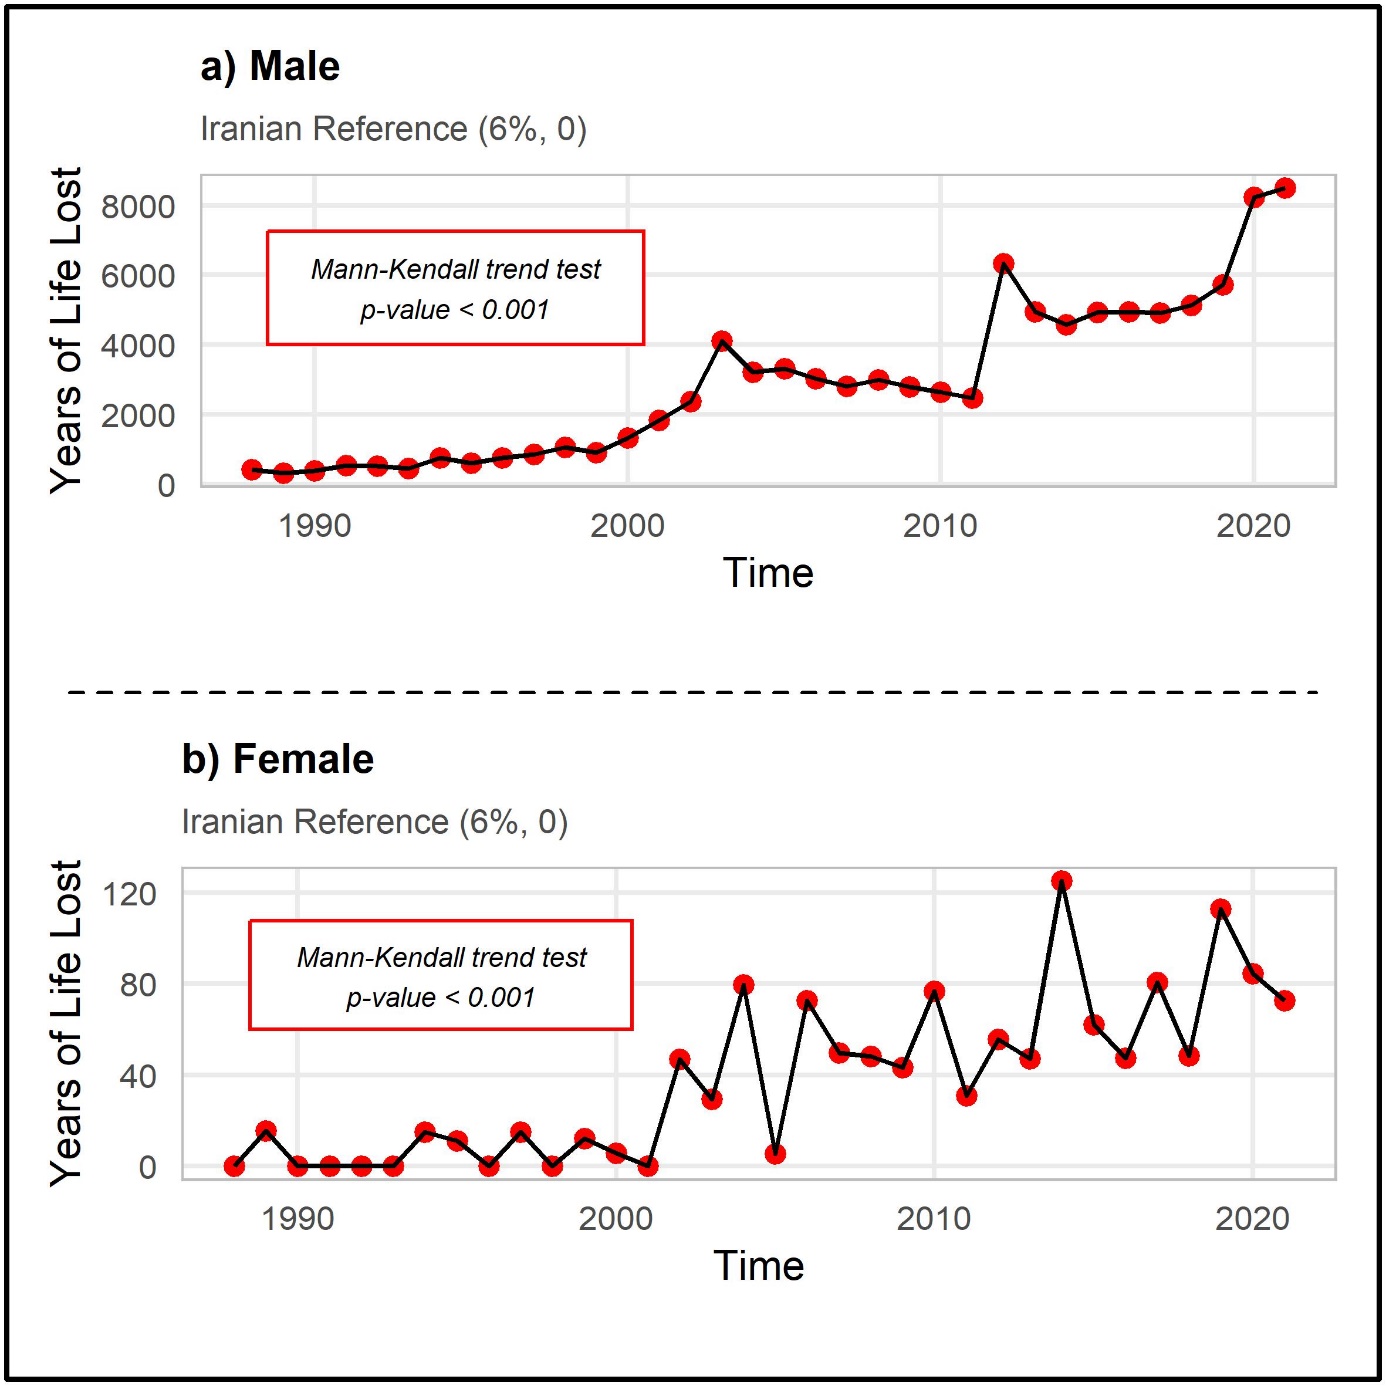


Supplementary Figure S4: Temporal Trends in Years of Life Lost by sex Using Iranian Reference (6%, 0)


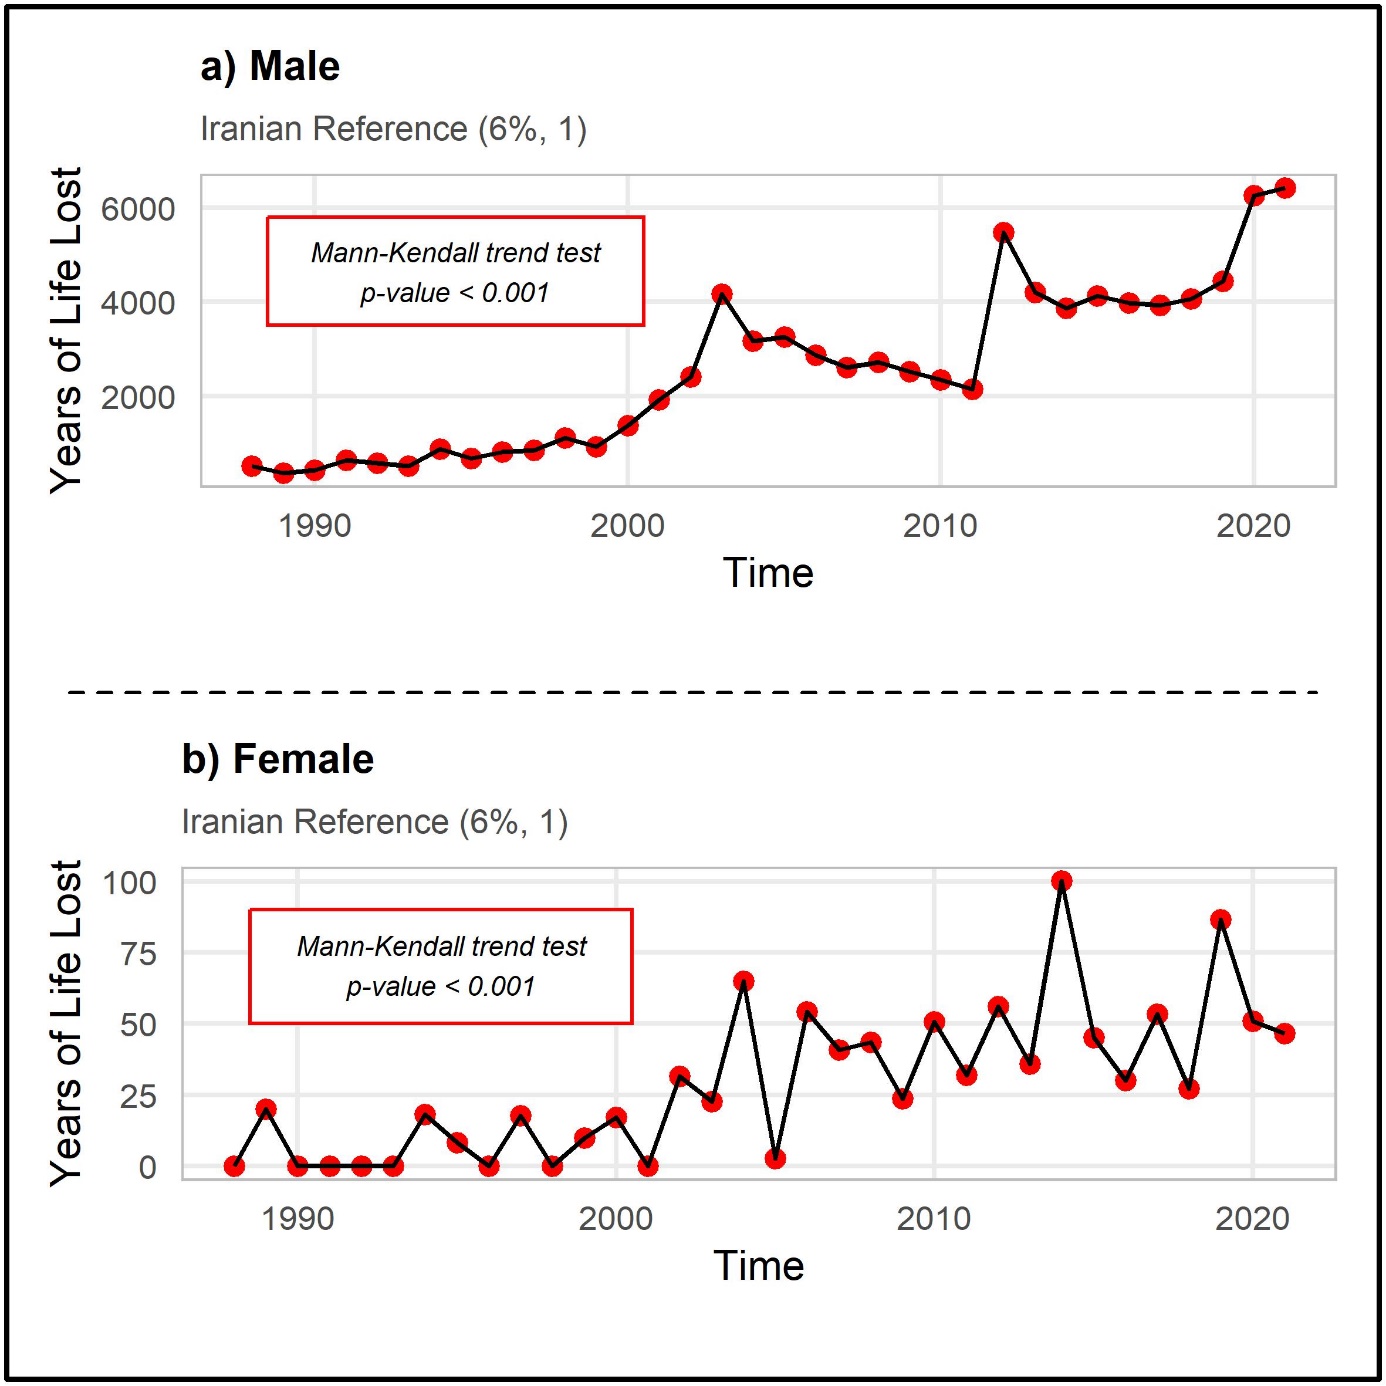


Supplementary Figure S5: Temporal Trends in Years of Life Lost by sex Using Iranian Reference (6%, 1)


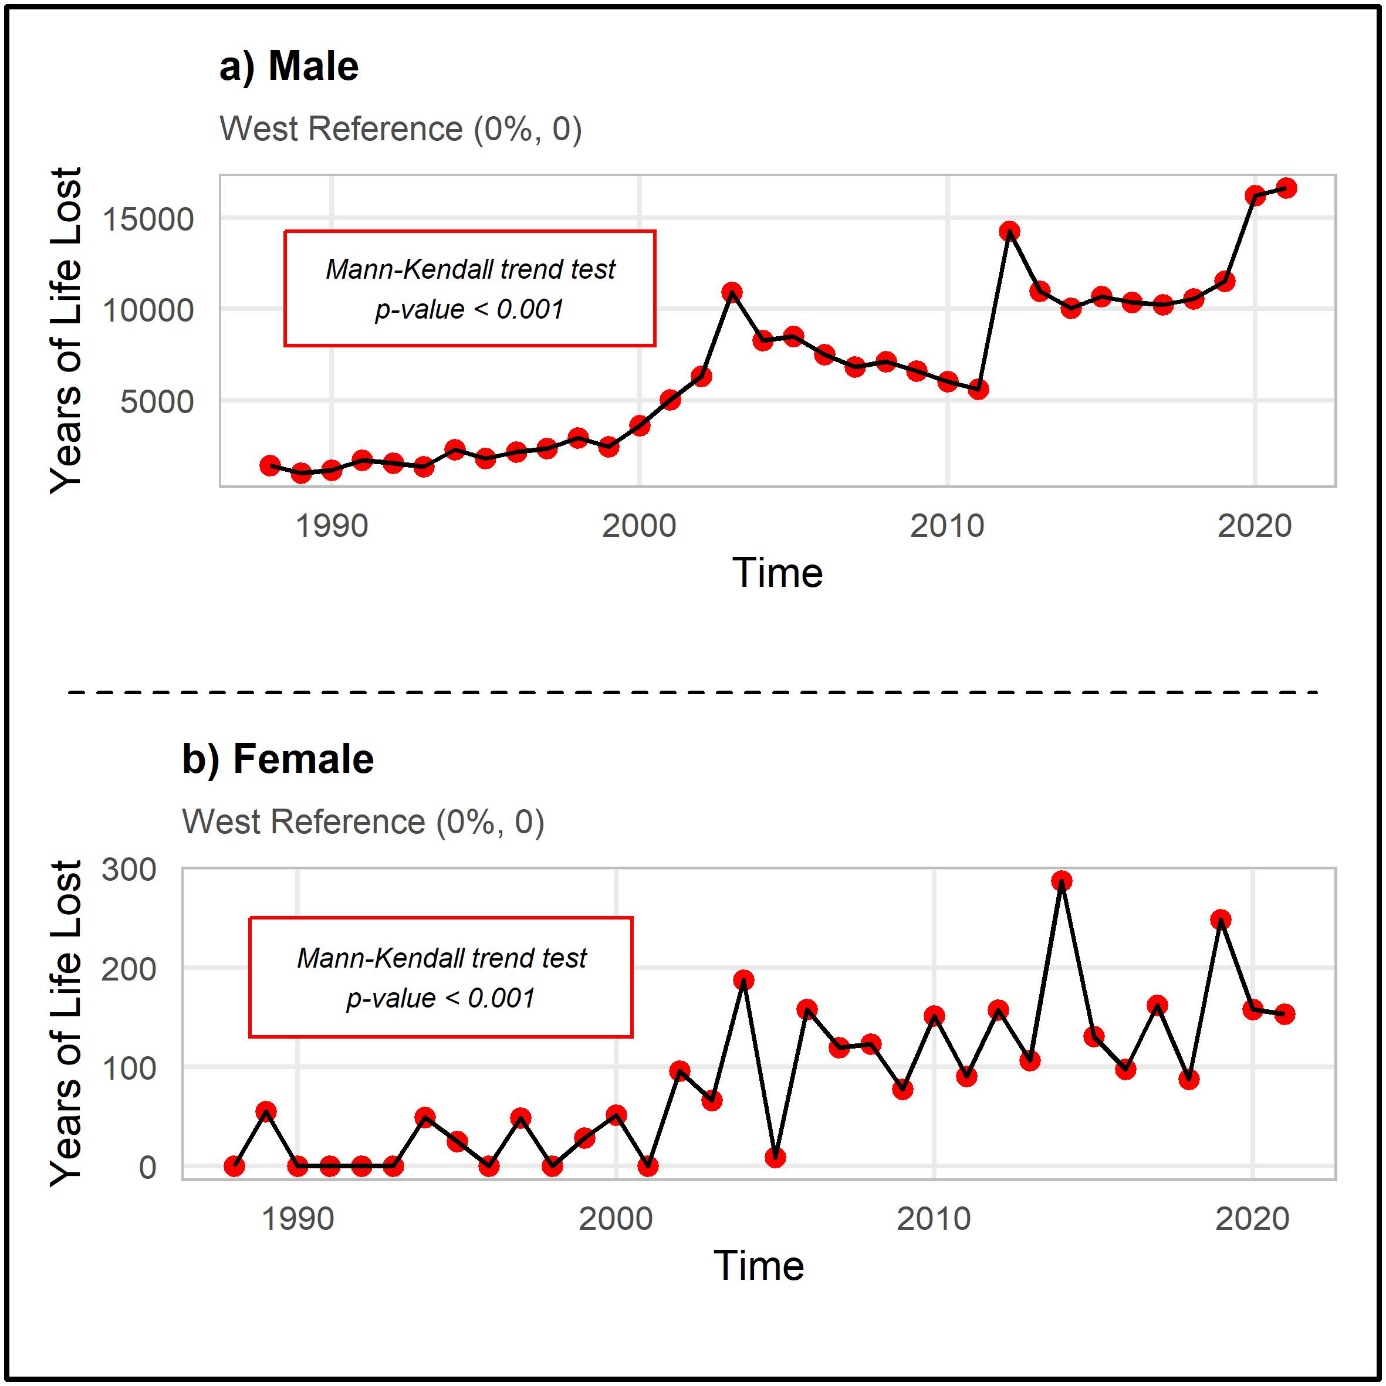


Supplementary Figure S6: Temporal Trends in Years of Life Lost by sex Using West Reference (0%, 0)


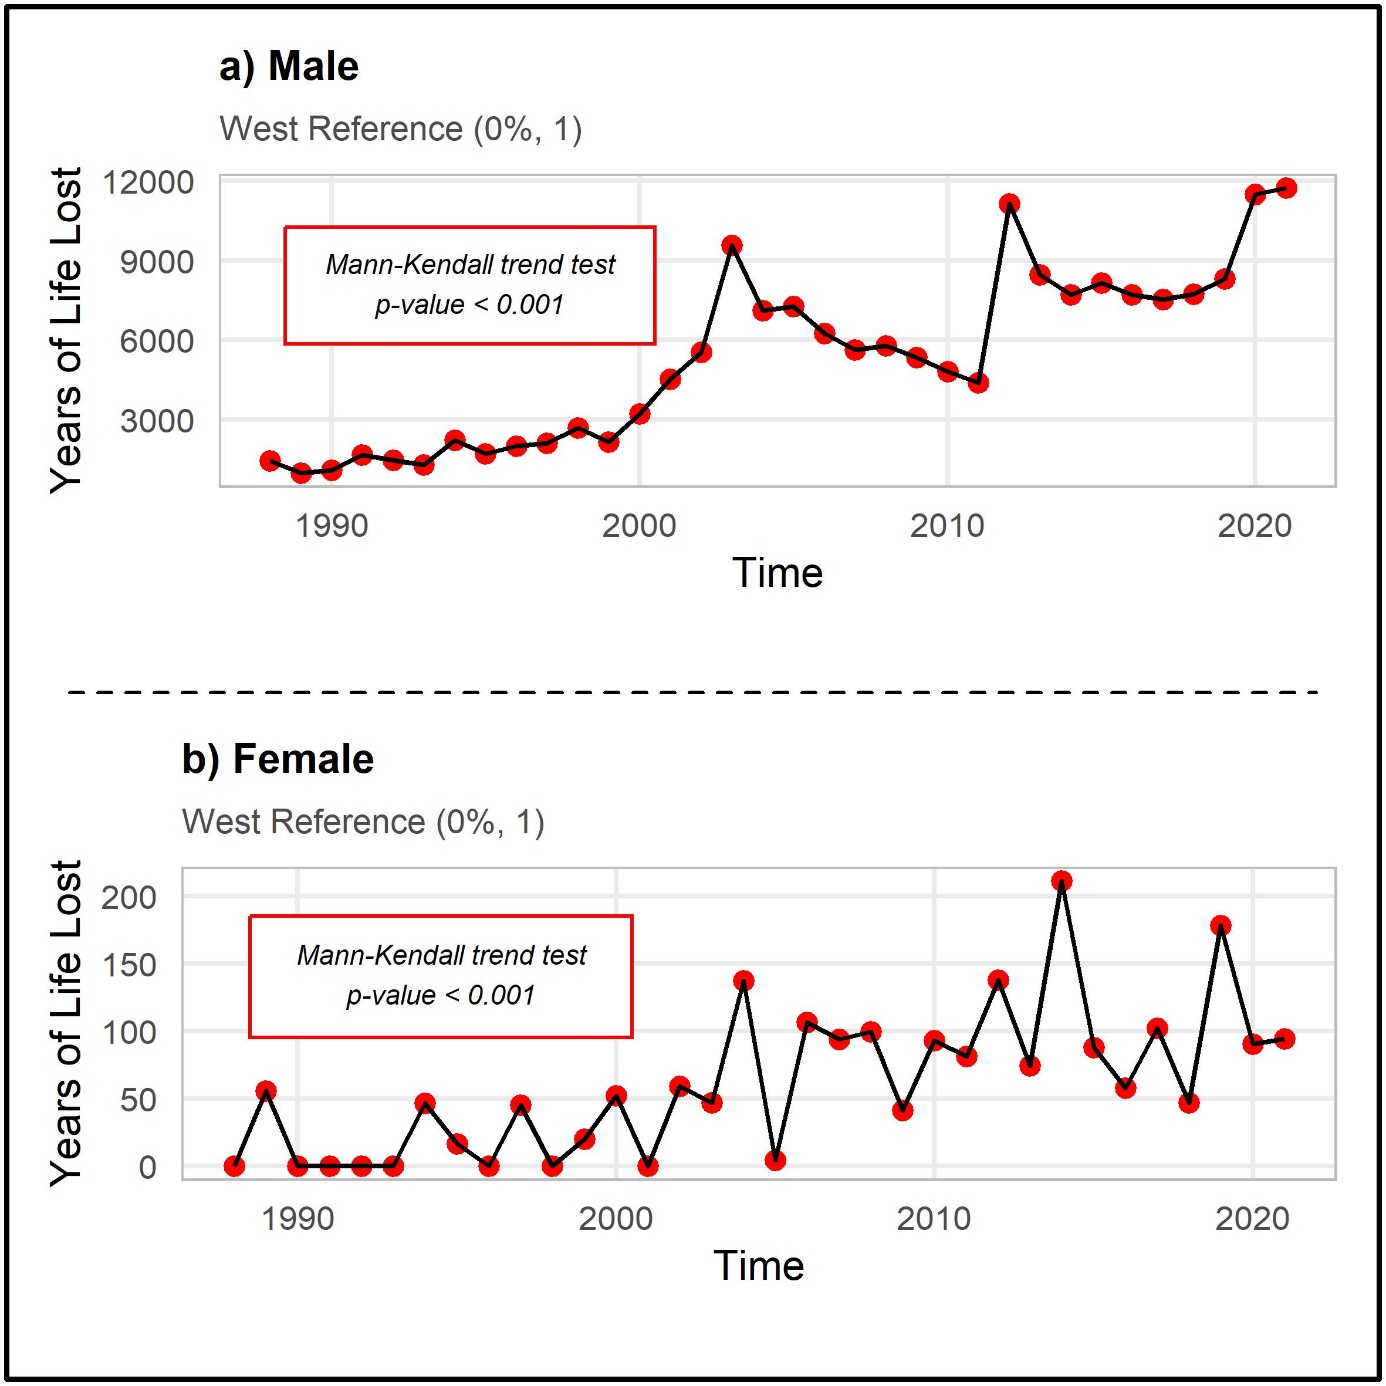


Supplementary Figure S7: Temporal Trends in Years of Life Lost by sex Using West Reference (0%, 1)


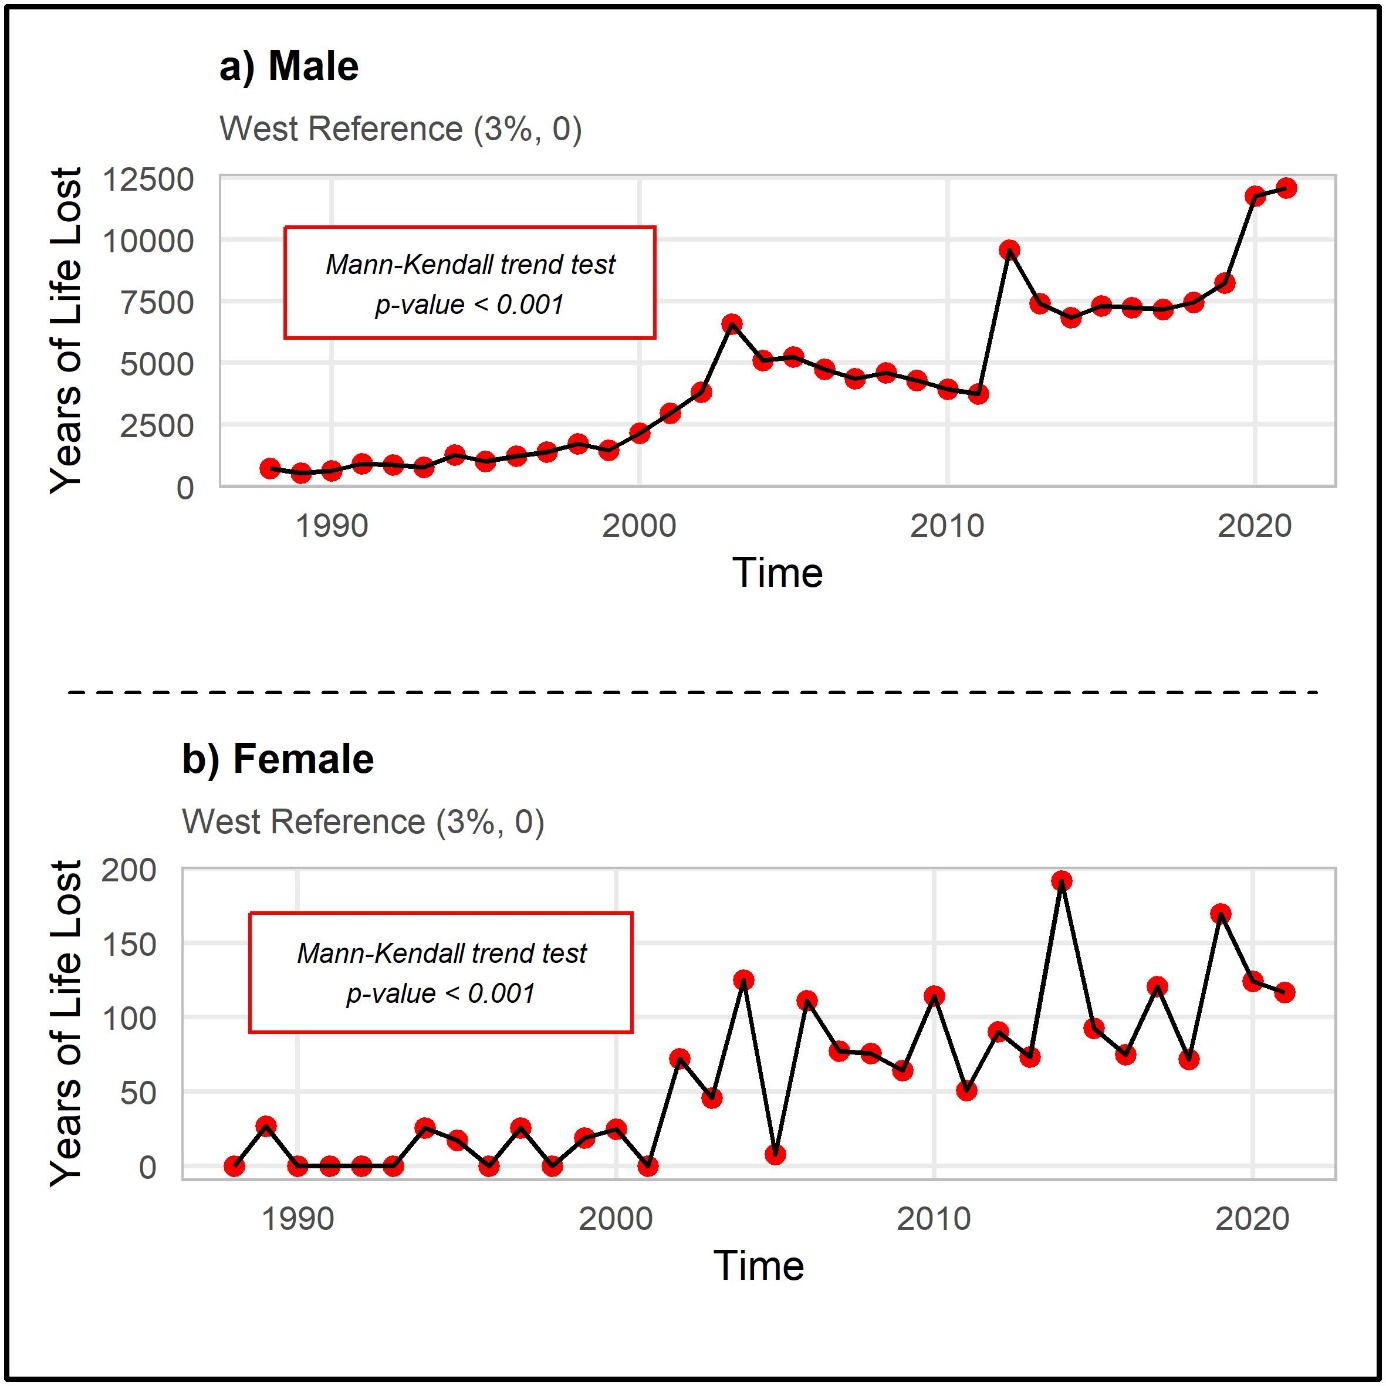


Supplementary Figure S8: Temporal Trends in Years of Life Lost by sex Using West Reference (3%, 0)


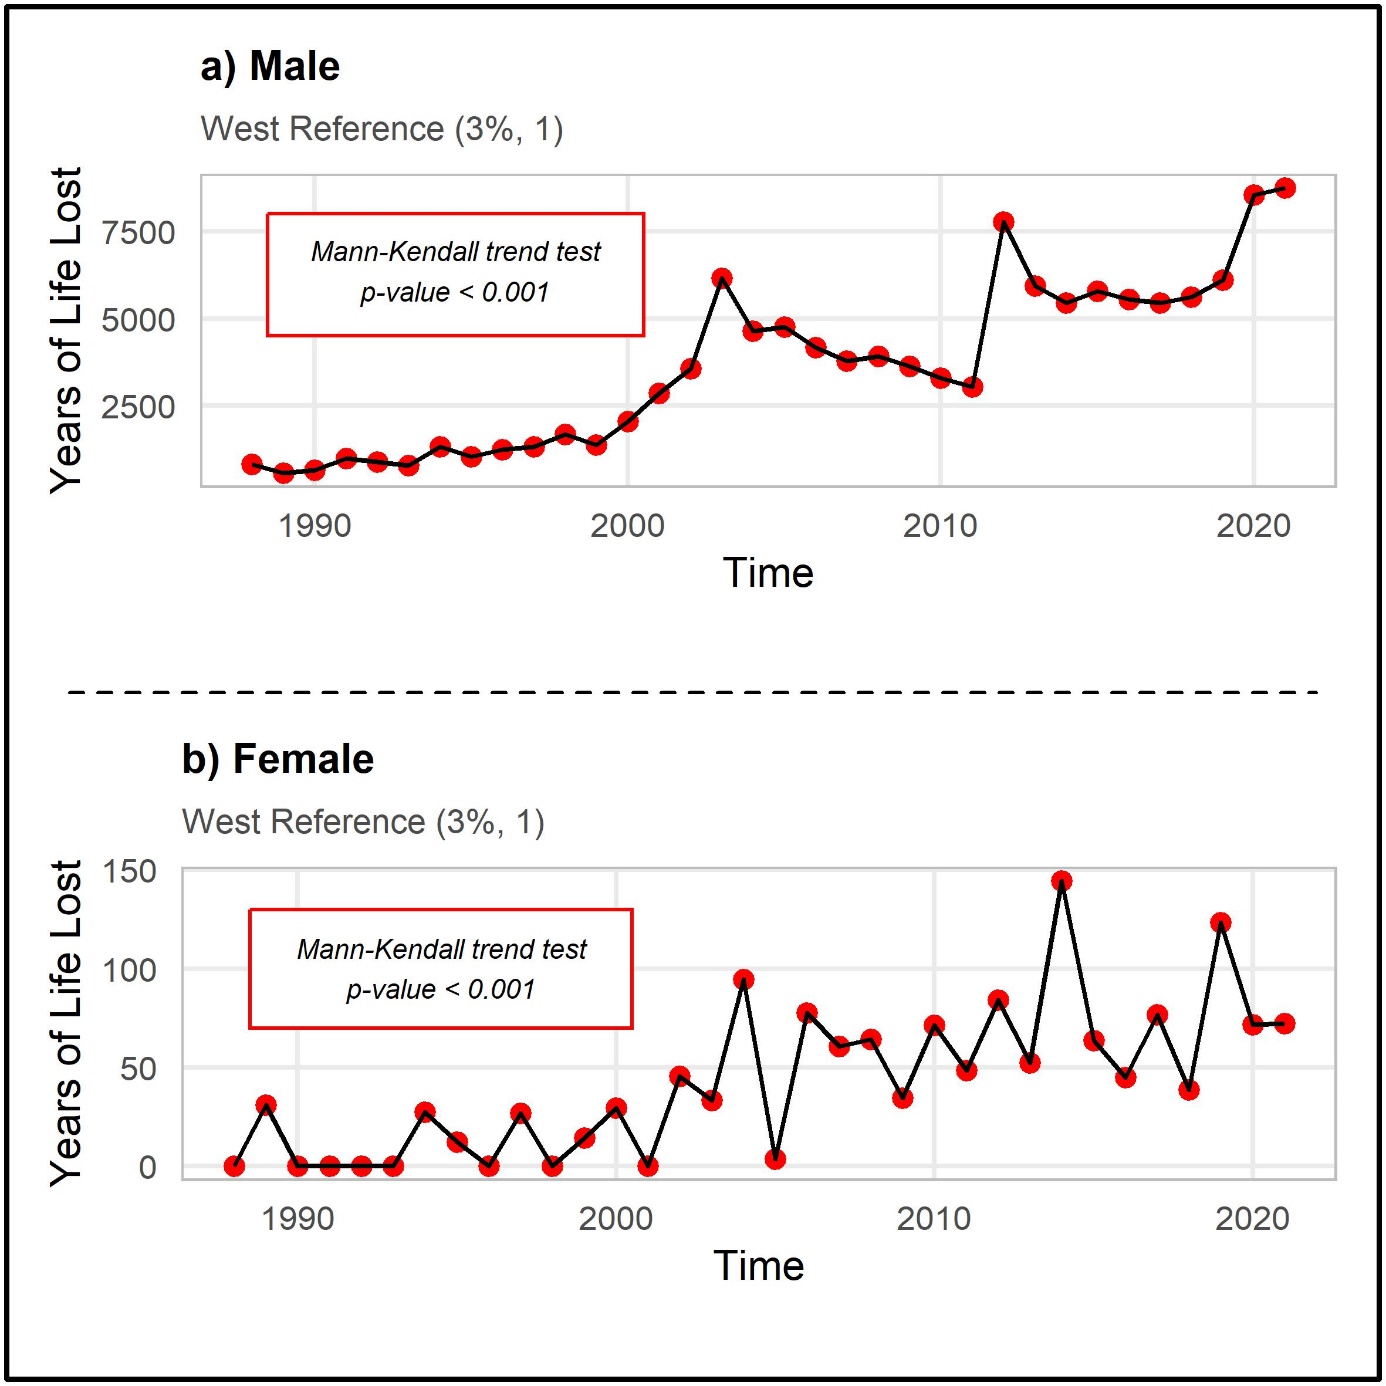


Supplementary Figure S9: Temporal Trends in Years of Life Lost by sex Using West Reference (3%, 1)


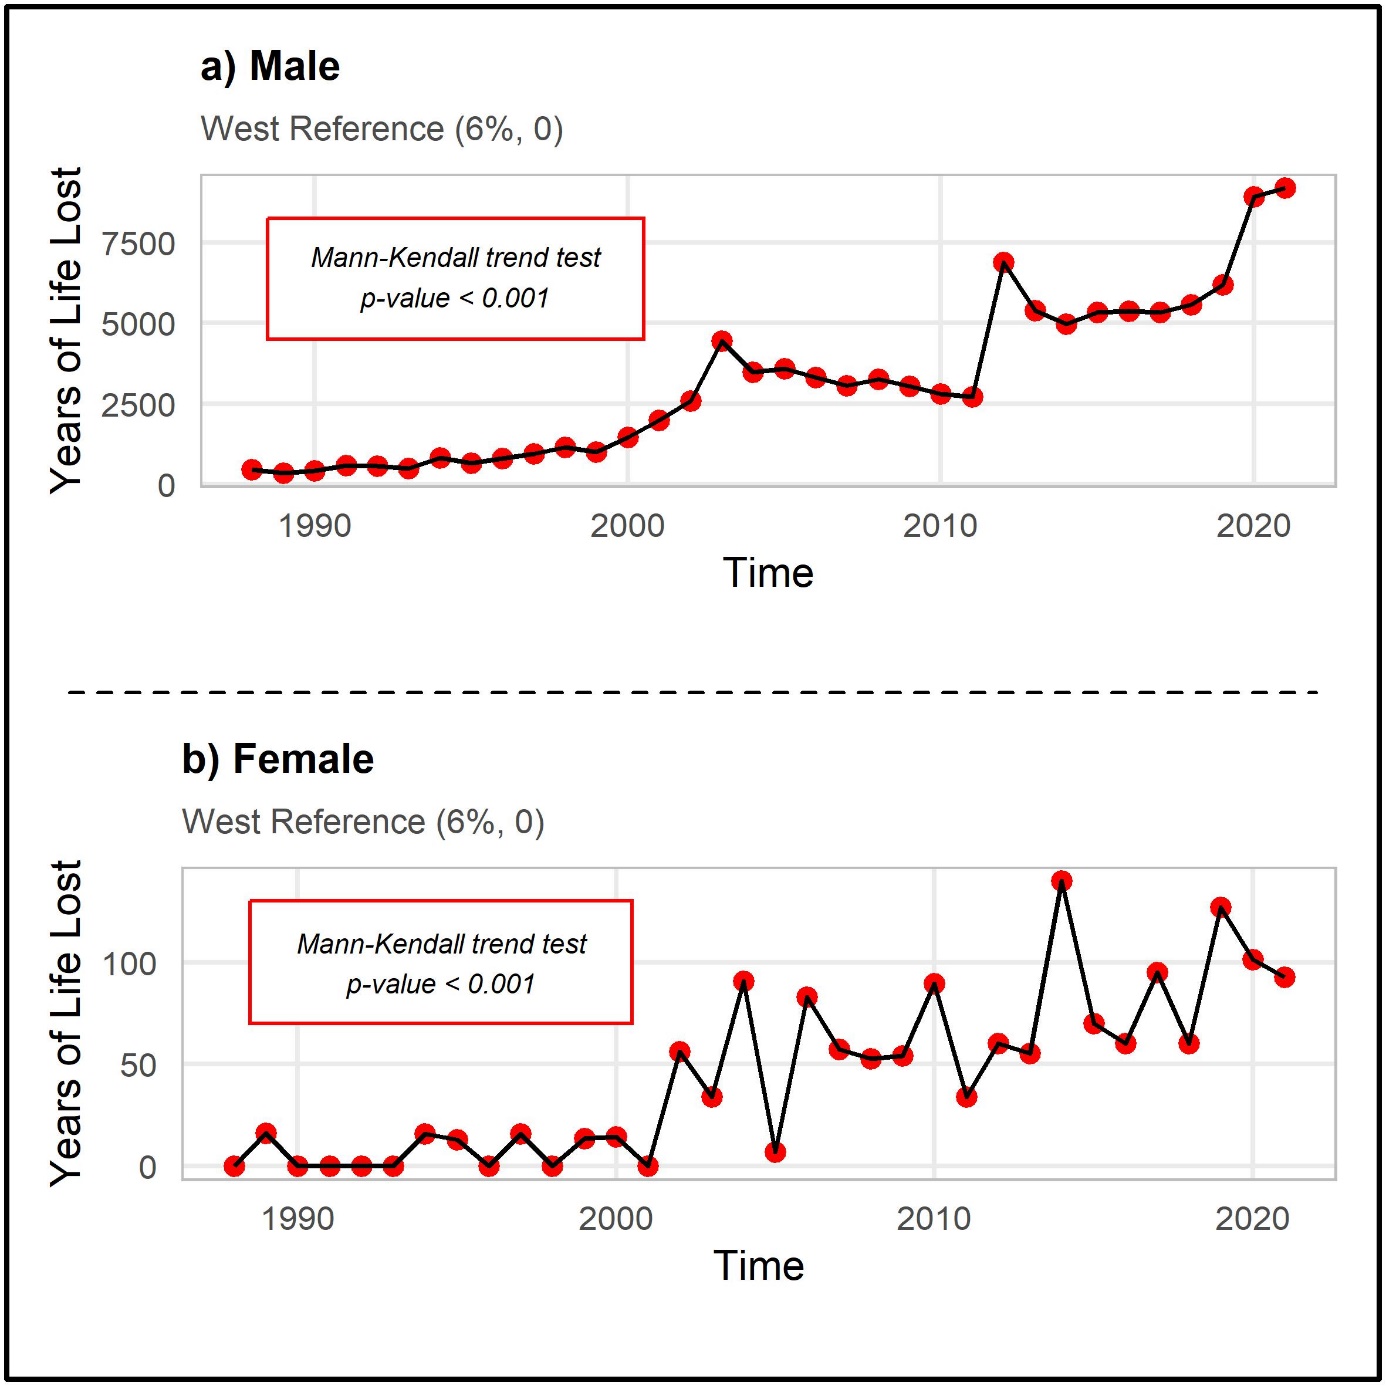


Supplementary Figure S10: Temporal Trends in Years of Life Lost by sex Using West Reference (6%, 0)


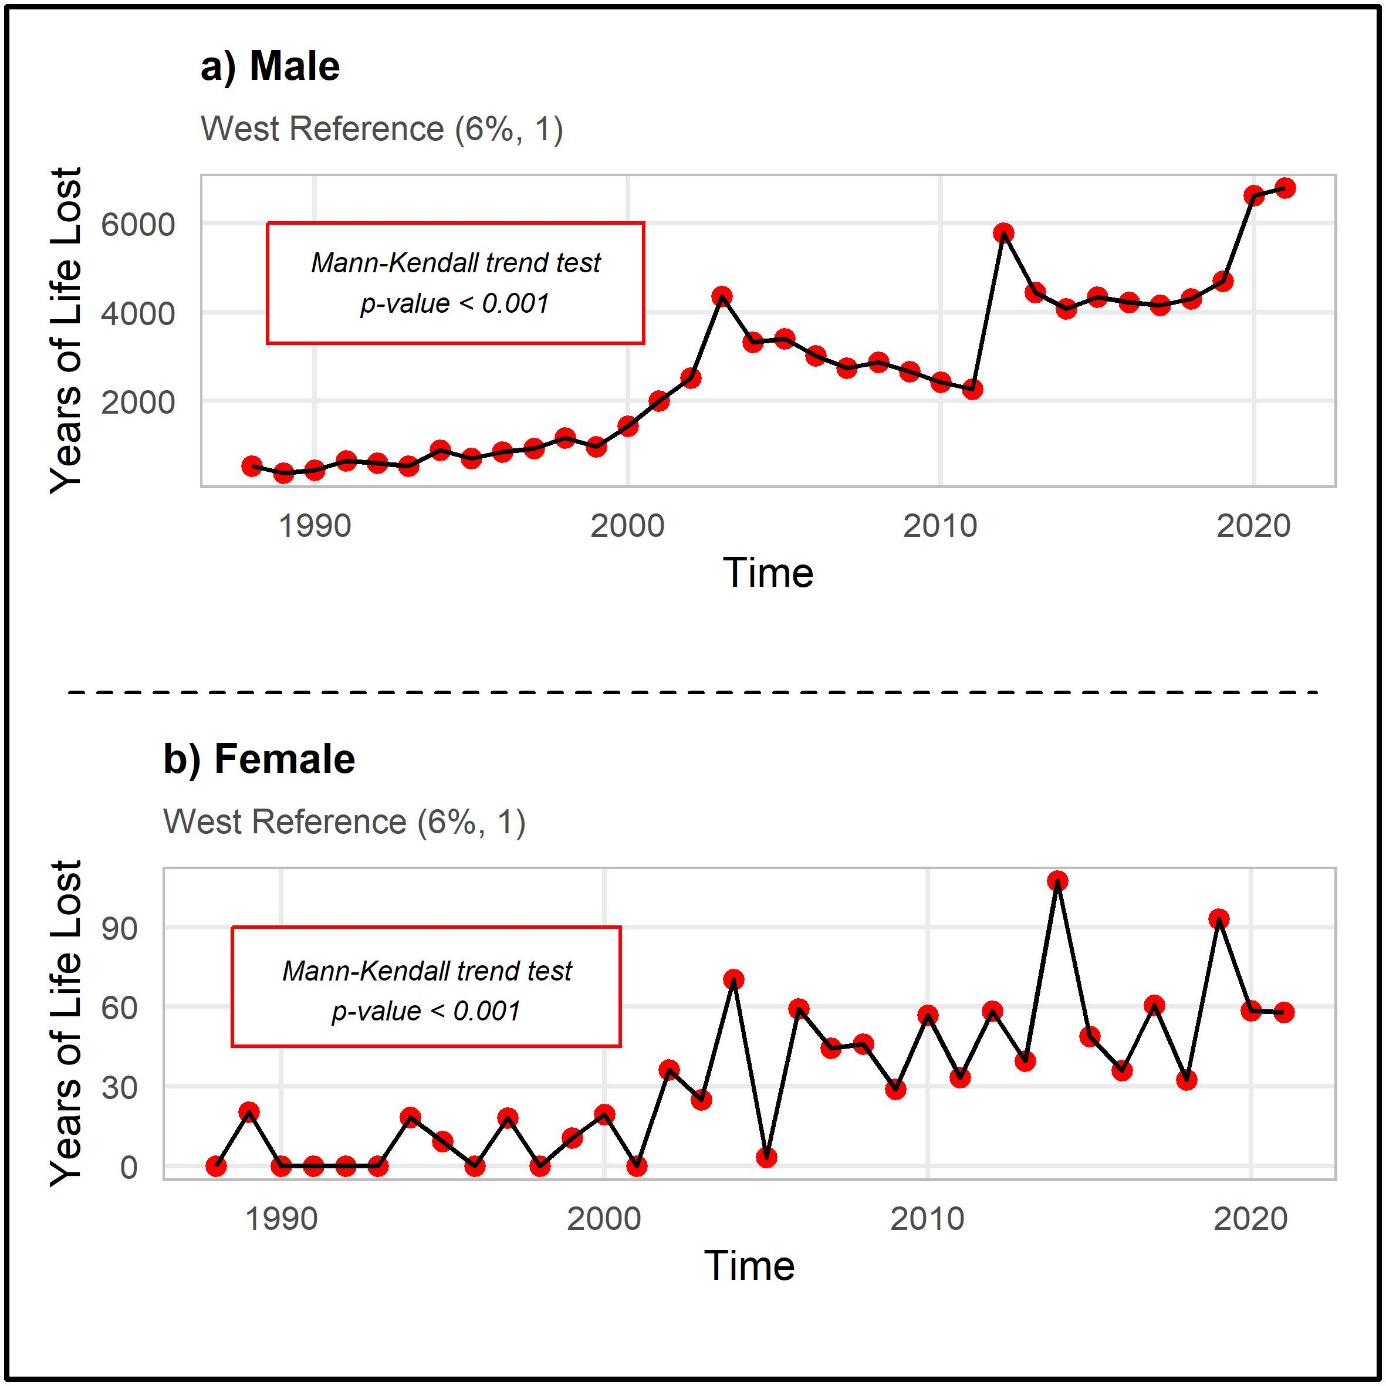


Supplementary Figure S11: Temporal Trends in Years of Life Lost by sex Using West Reference (6%, 1)


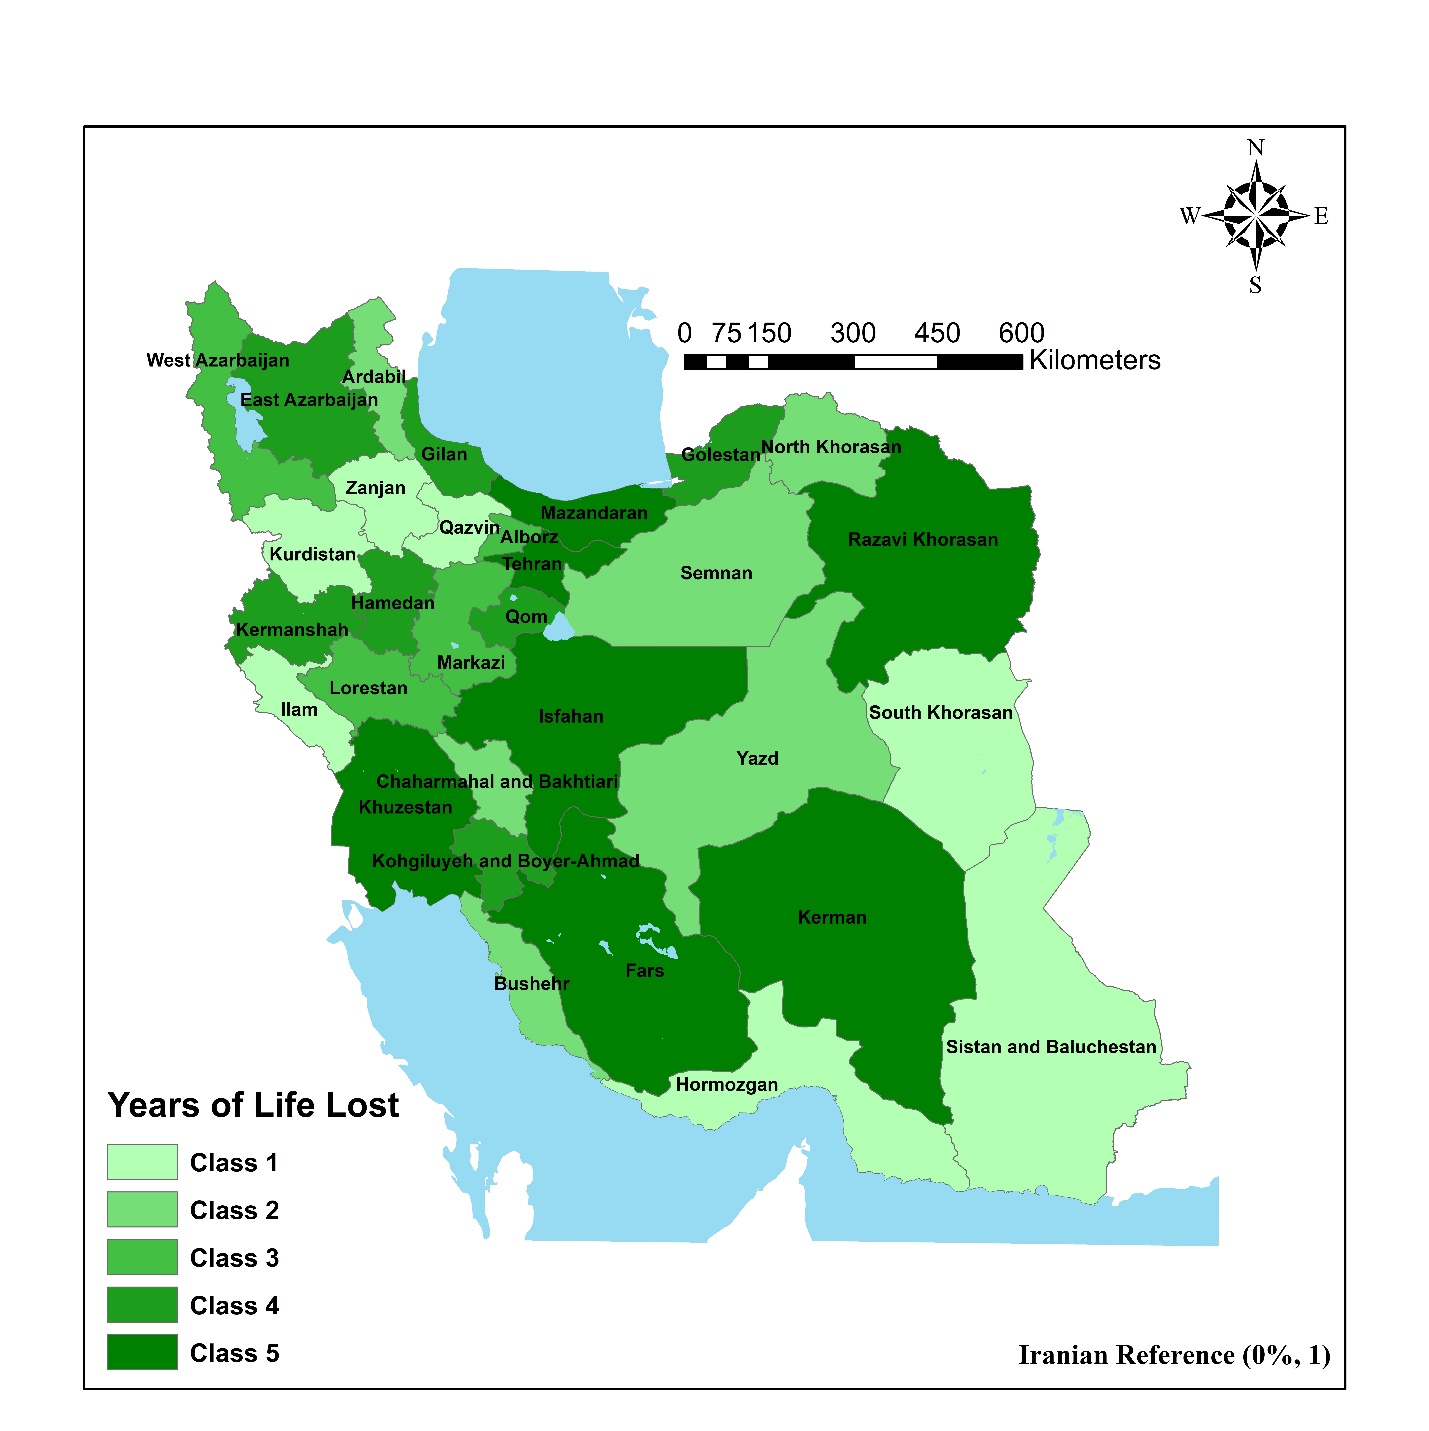


Supplementary Figure S12: Geographic Distribution of Years of Life Lost across Iranian Provinces using Iranian Reference (0%, 1)


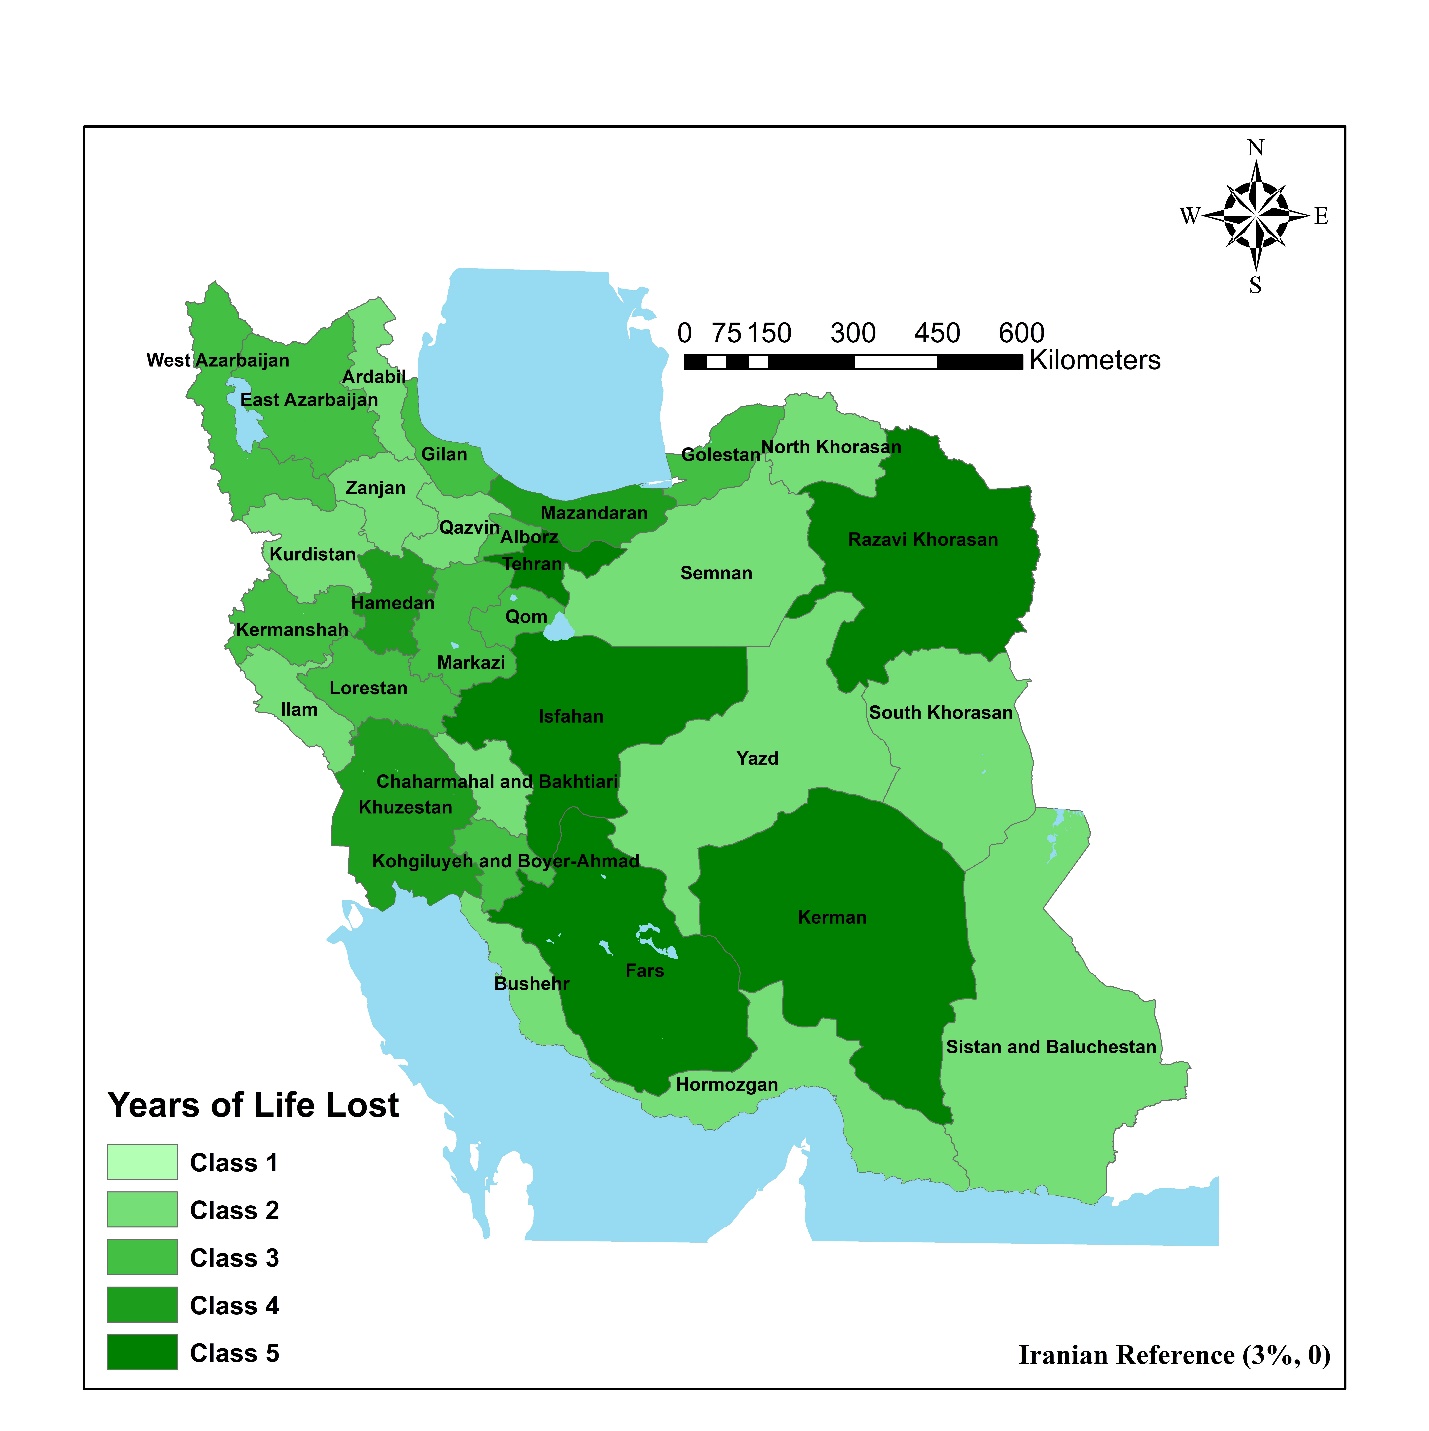


Supplementary Figure S13: Geographic Distribution of Years of Life Lost across Iranian Provinces using Iranian Reference (3%, 0)


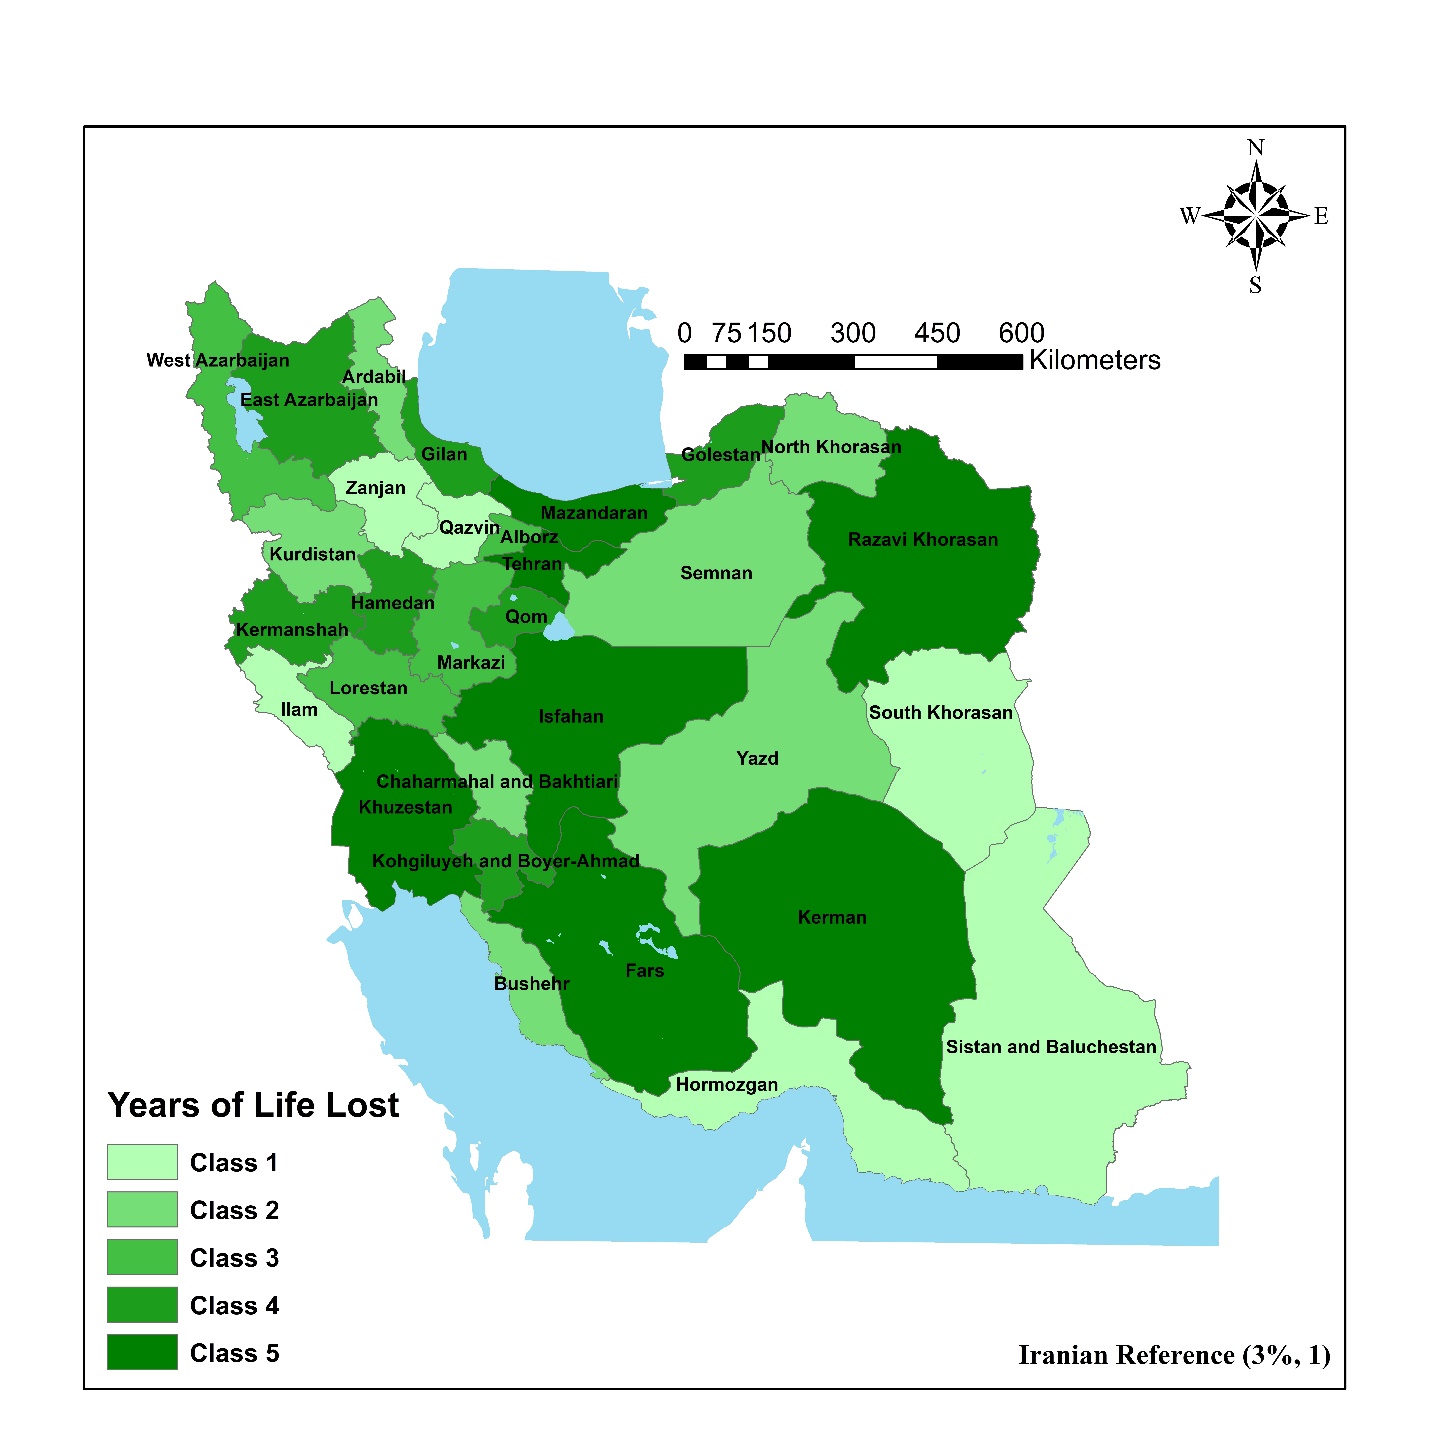


Supplementary Figure S14: Geographic Distribution of Years of Life Lost across Iranian Provinces using Iranian Reference (3%, 1)


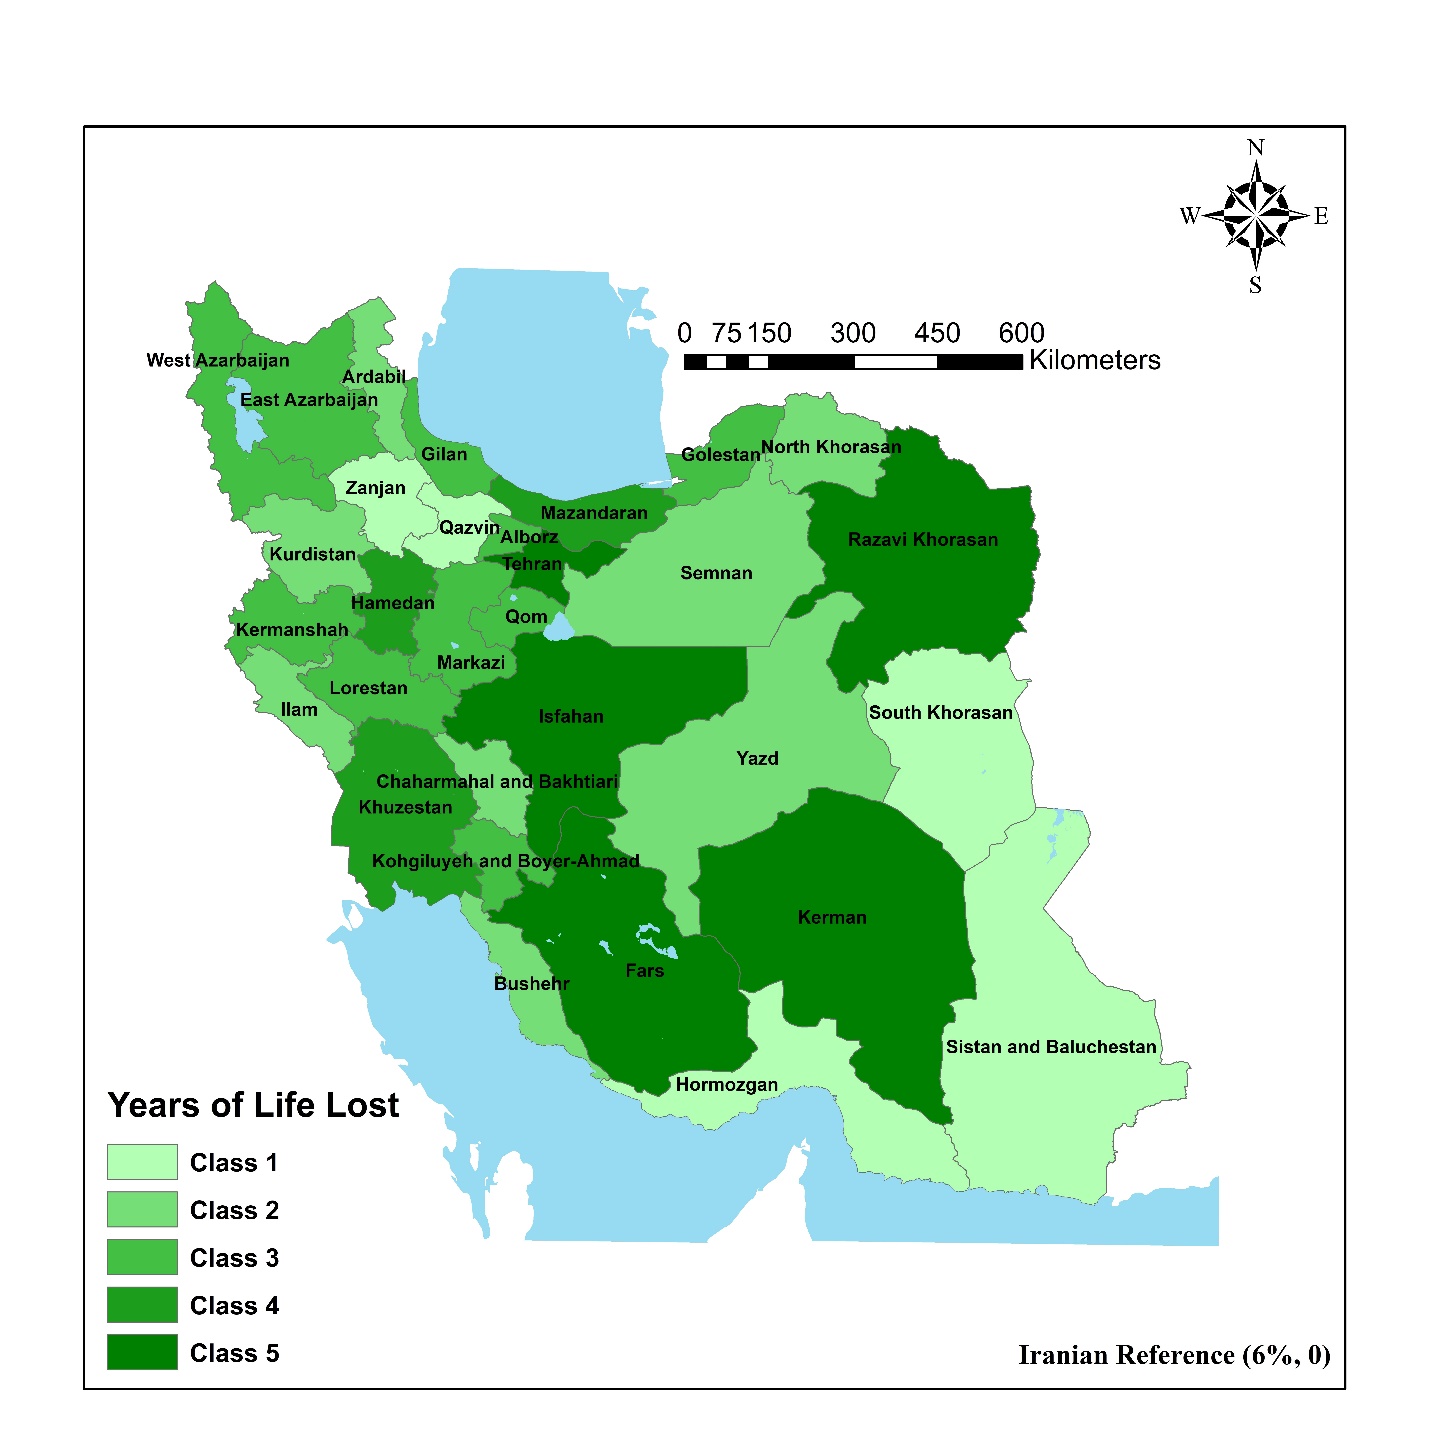


Supplementary Figure S15: Geographic Distribution of Years of Life Lost across Iranian Provinces using Iranian Reference (6%, 0)


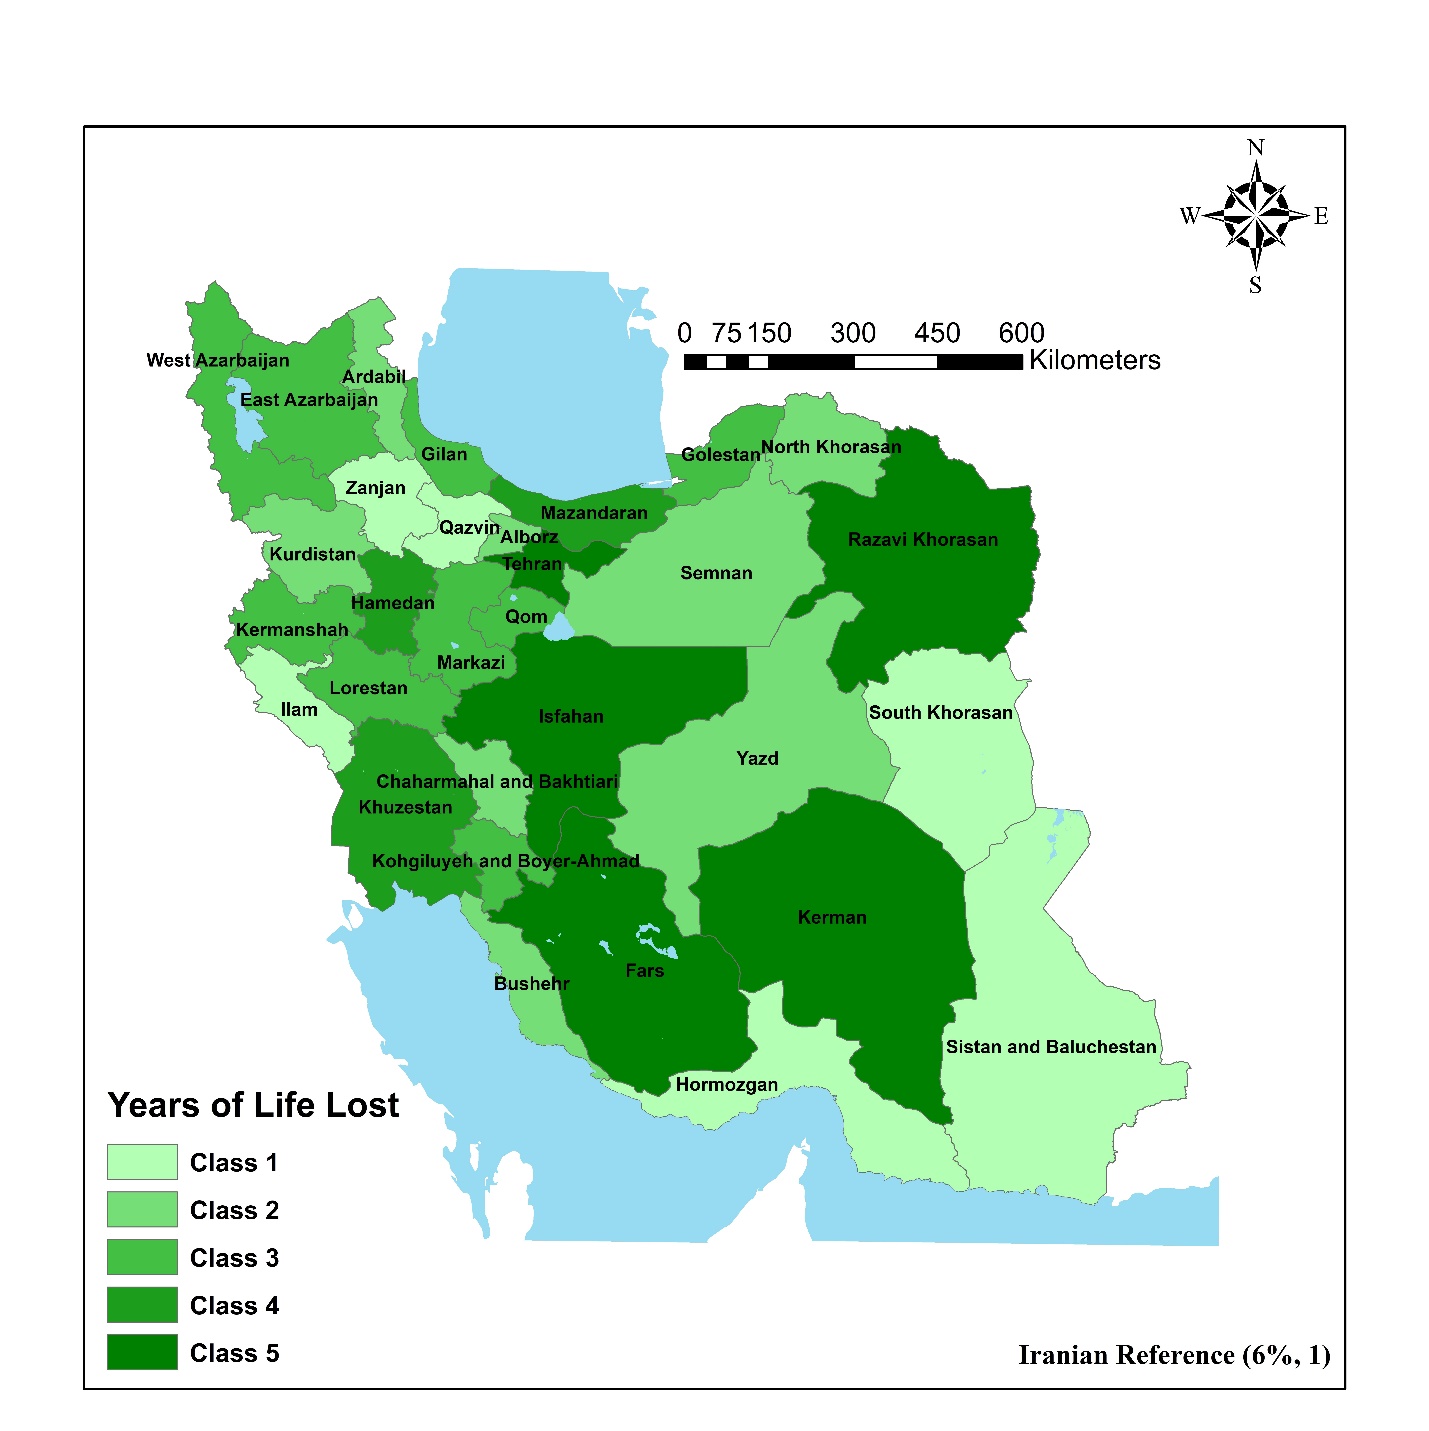


Supplementary Figure S16: Geographic Distribution of Years of Life Lost across Iranian Provinces using Iranian Reference (6%, 1)


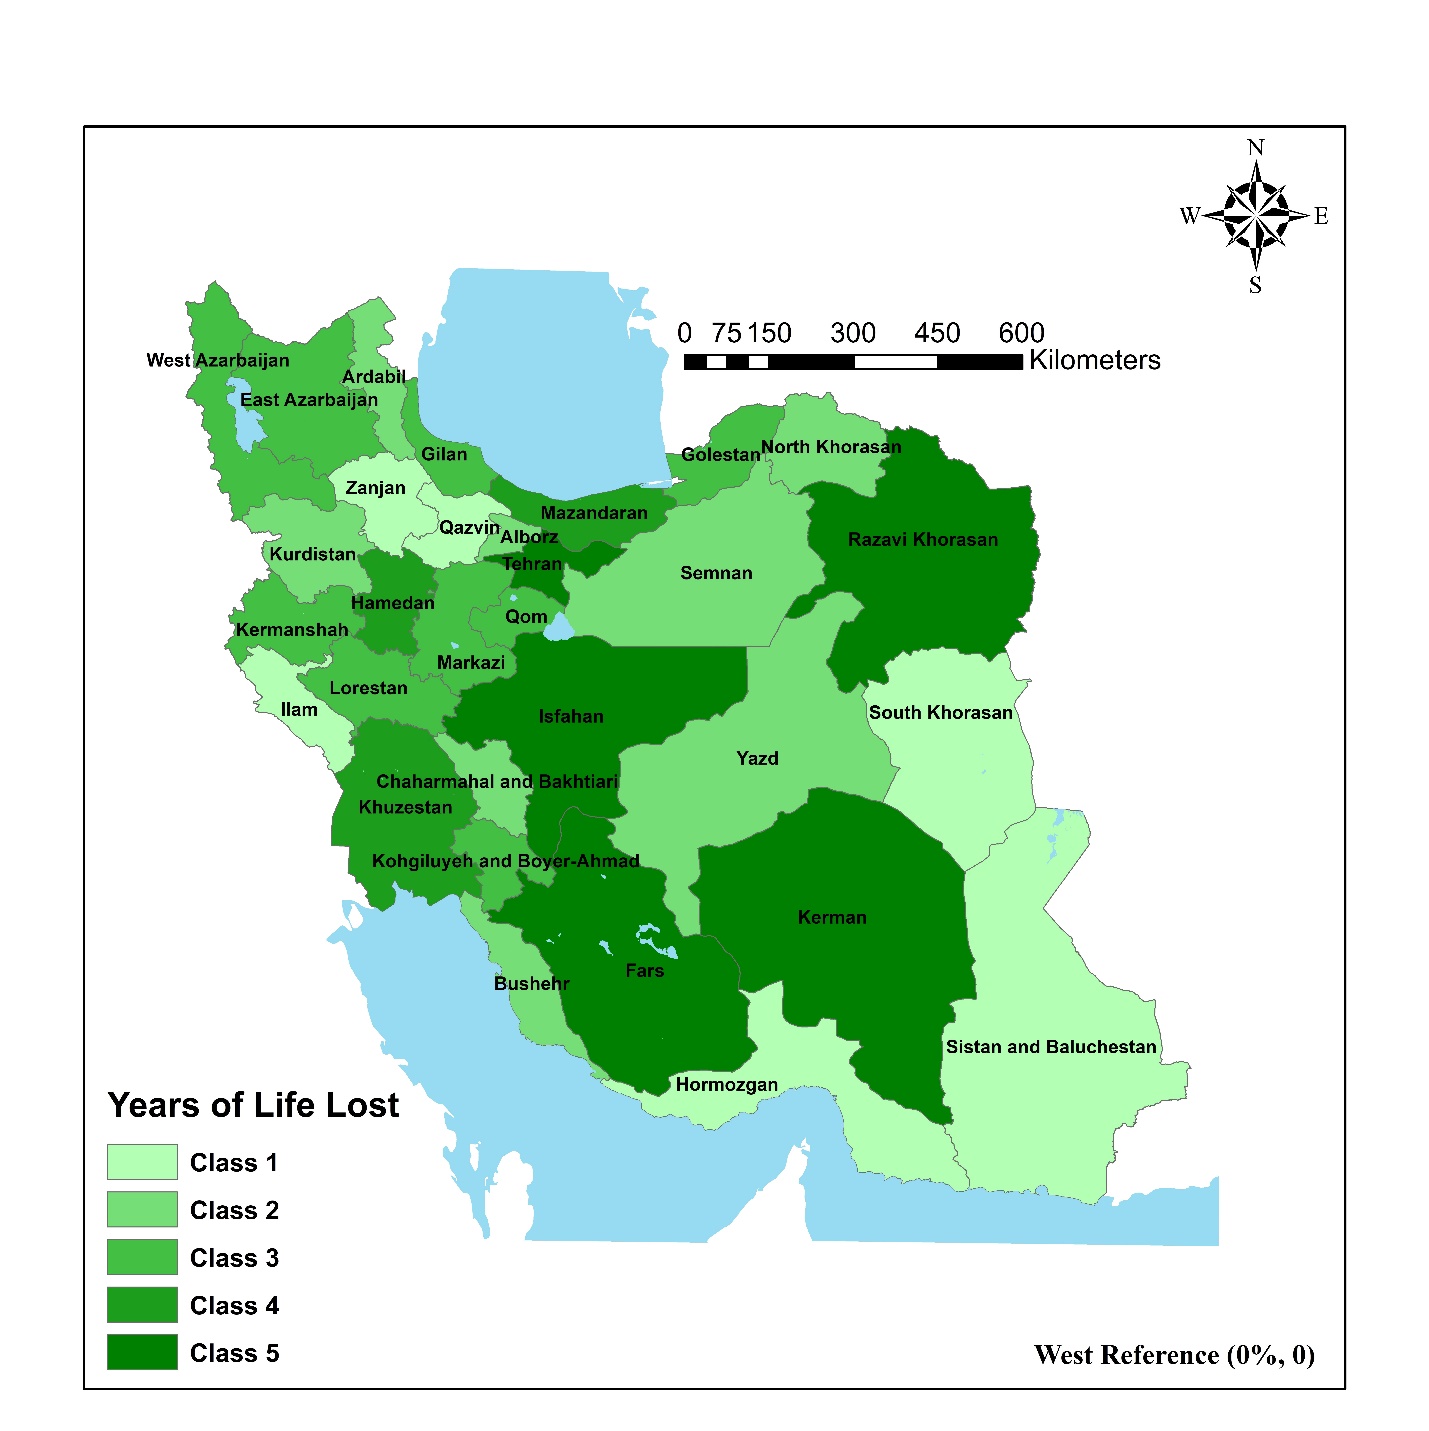


Supplementary Figure S17: Geographic Distribution of Years of Life Lost across Iranian Provinces using West Reference (0%, 0)


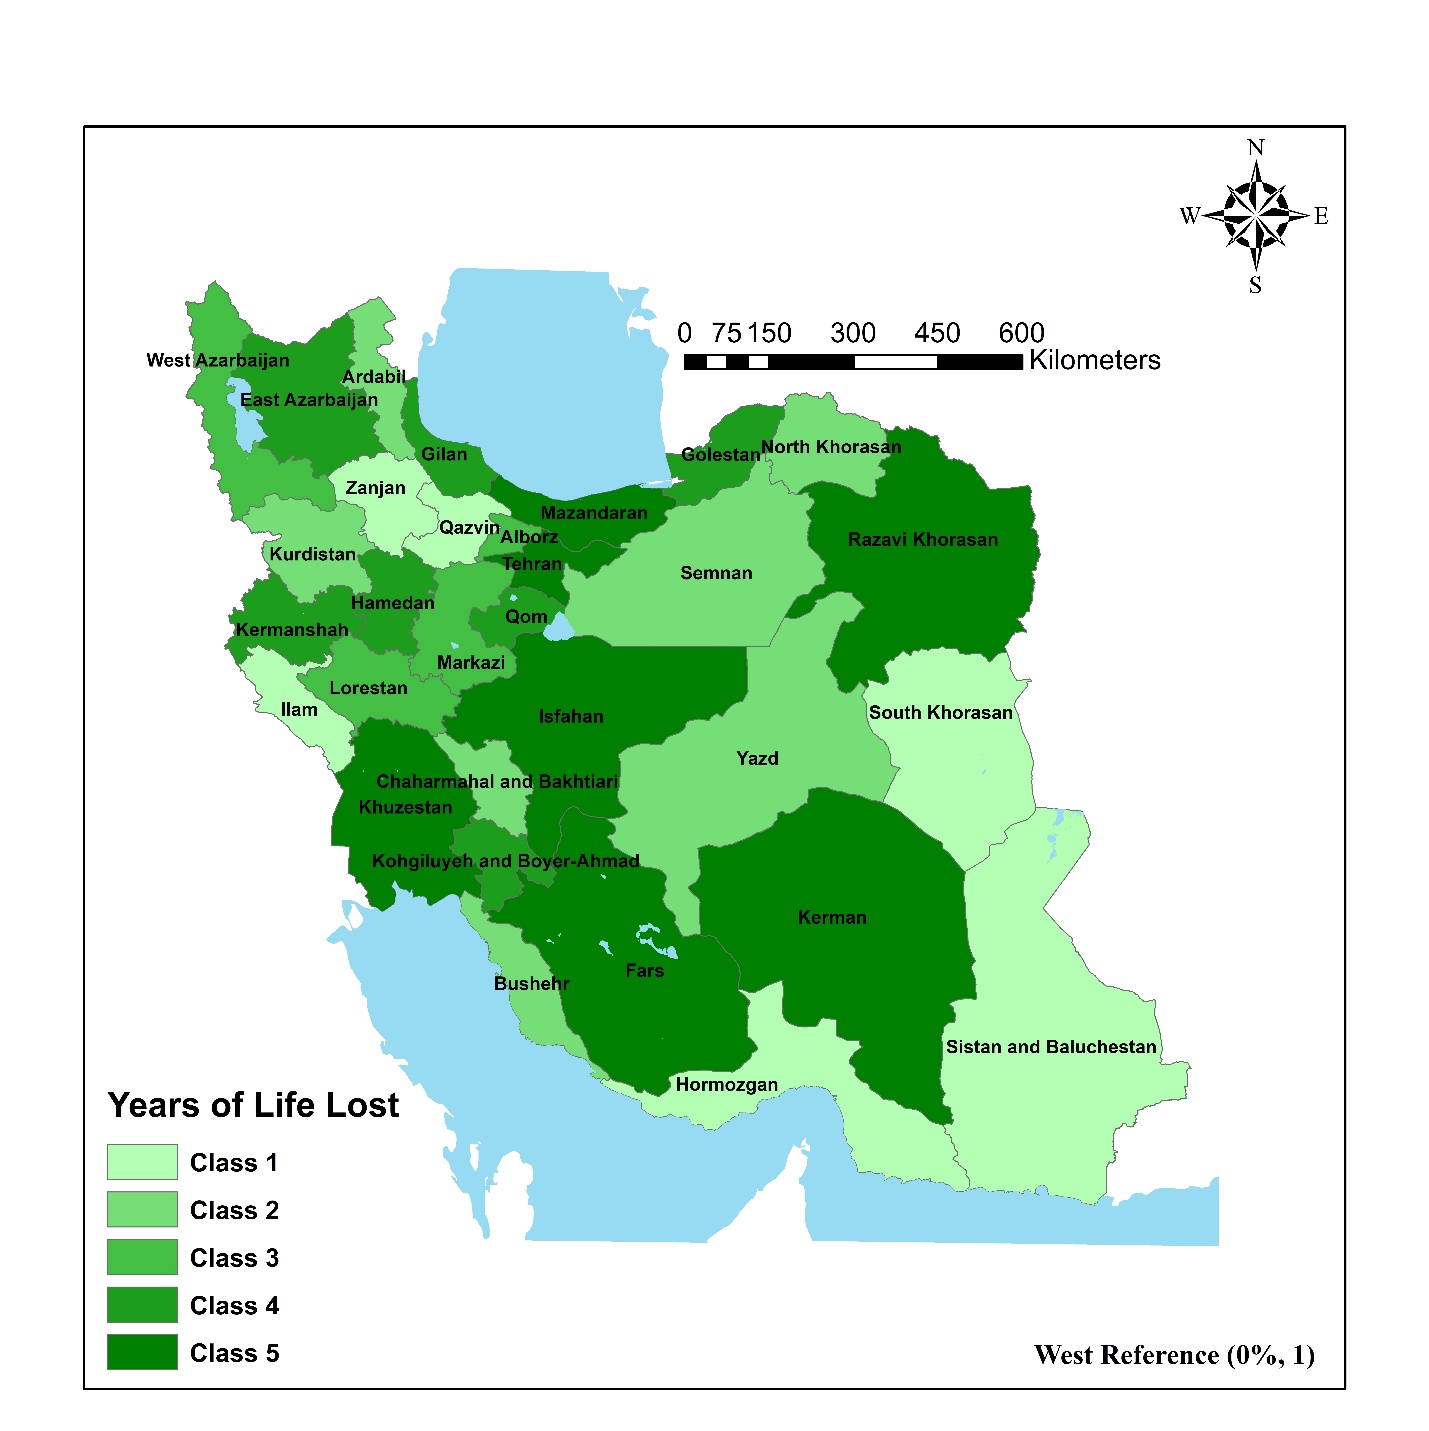


Supplementary Figure S18: Geographic Distribution of Years of Life Lost across Iranian Provinces using West Reference (0%, 1)


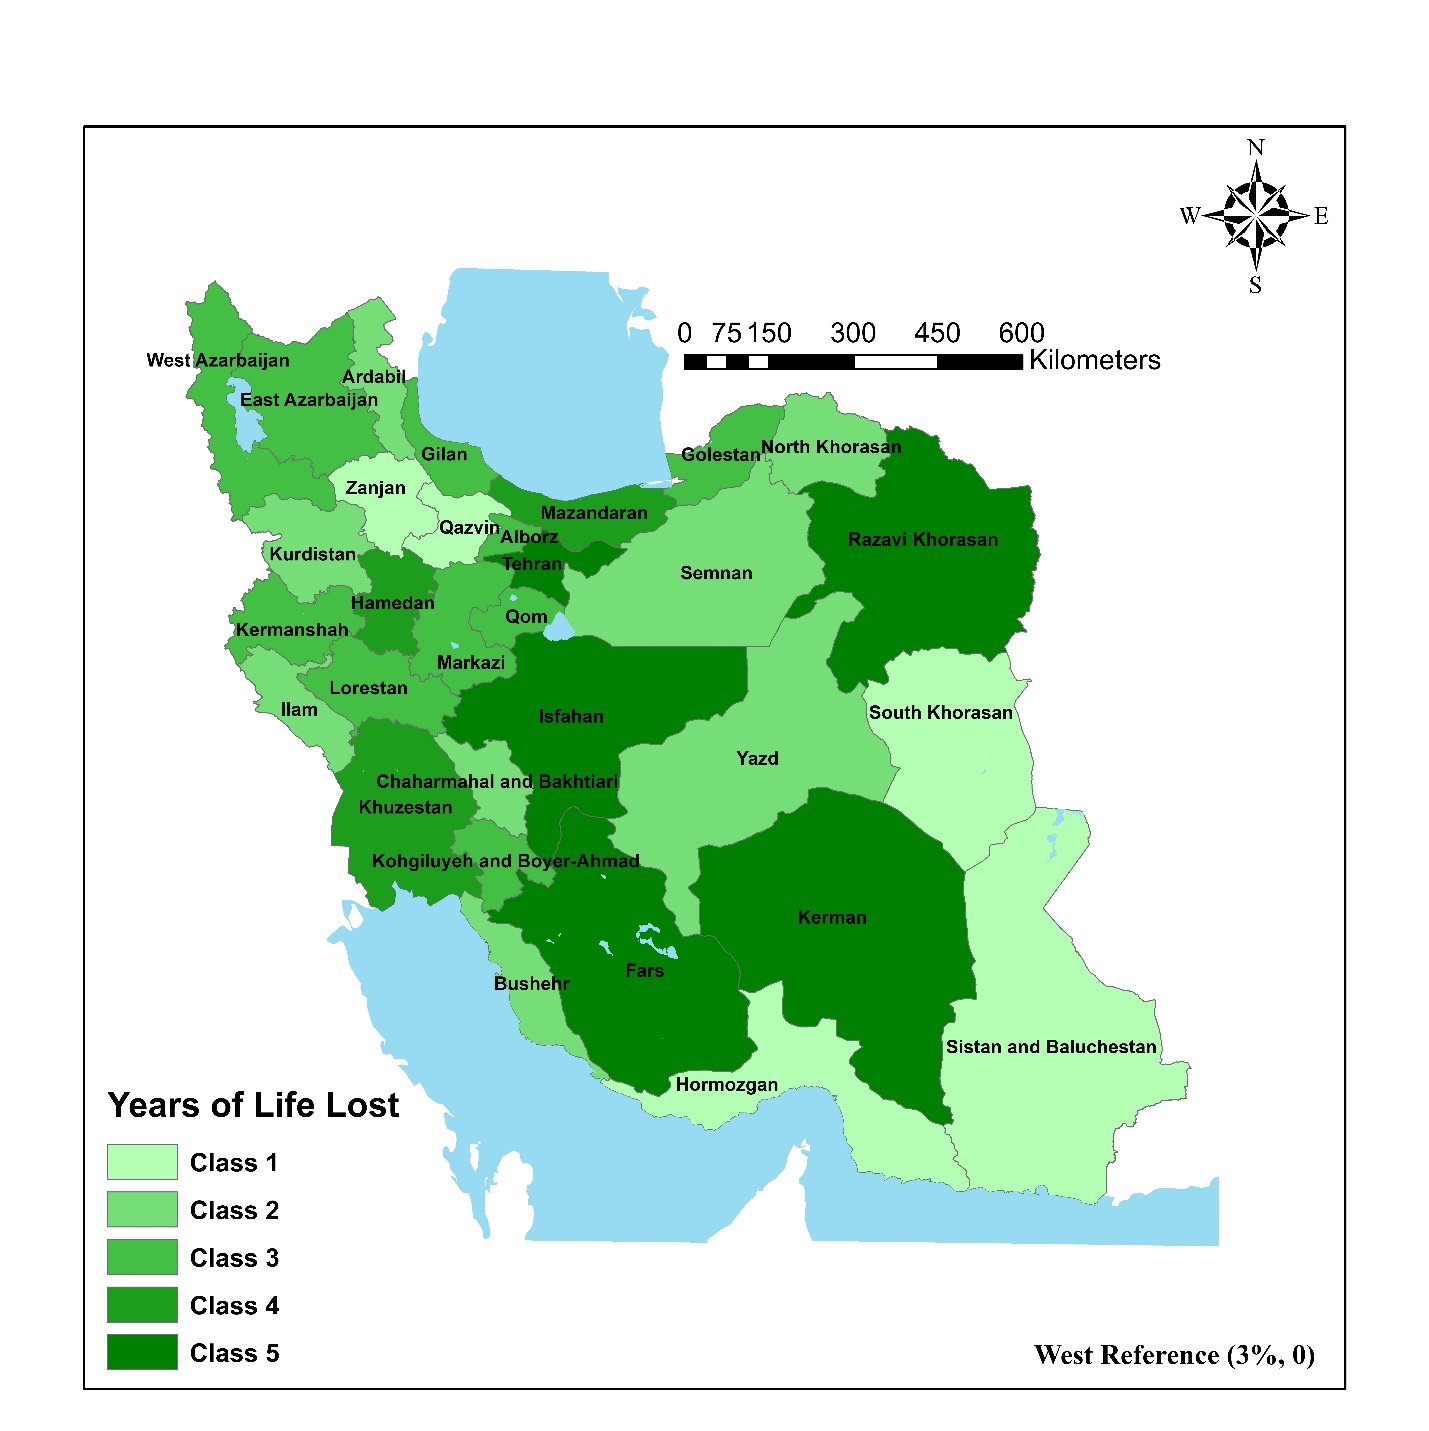


Supplementary Figure S19: Geographic Distribution of Years of Life Lost across Iranian Provinces using West Reference (3%, 0)


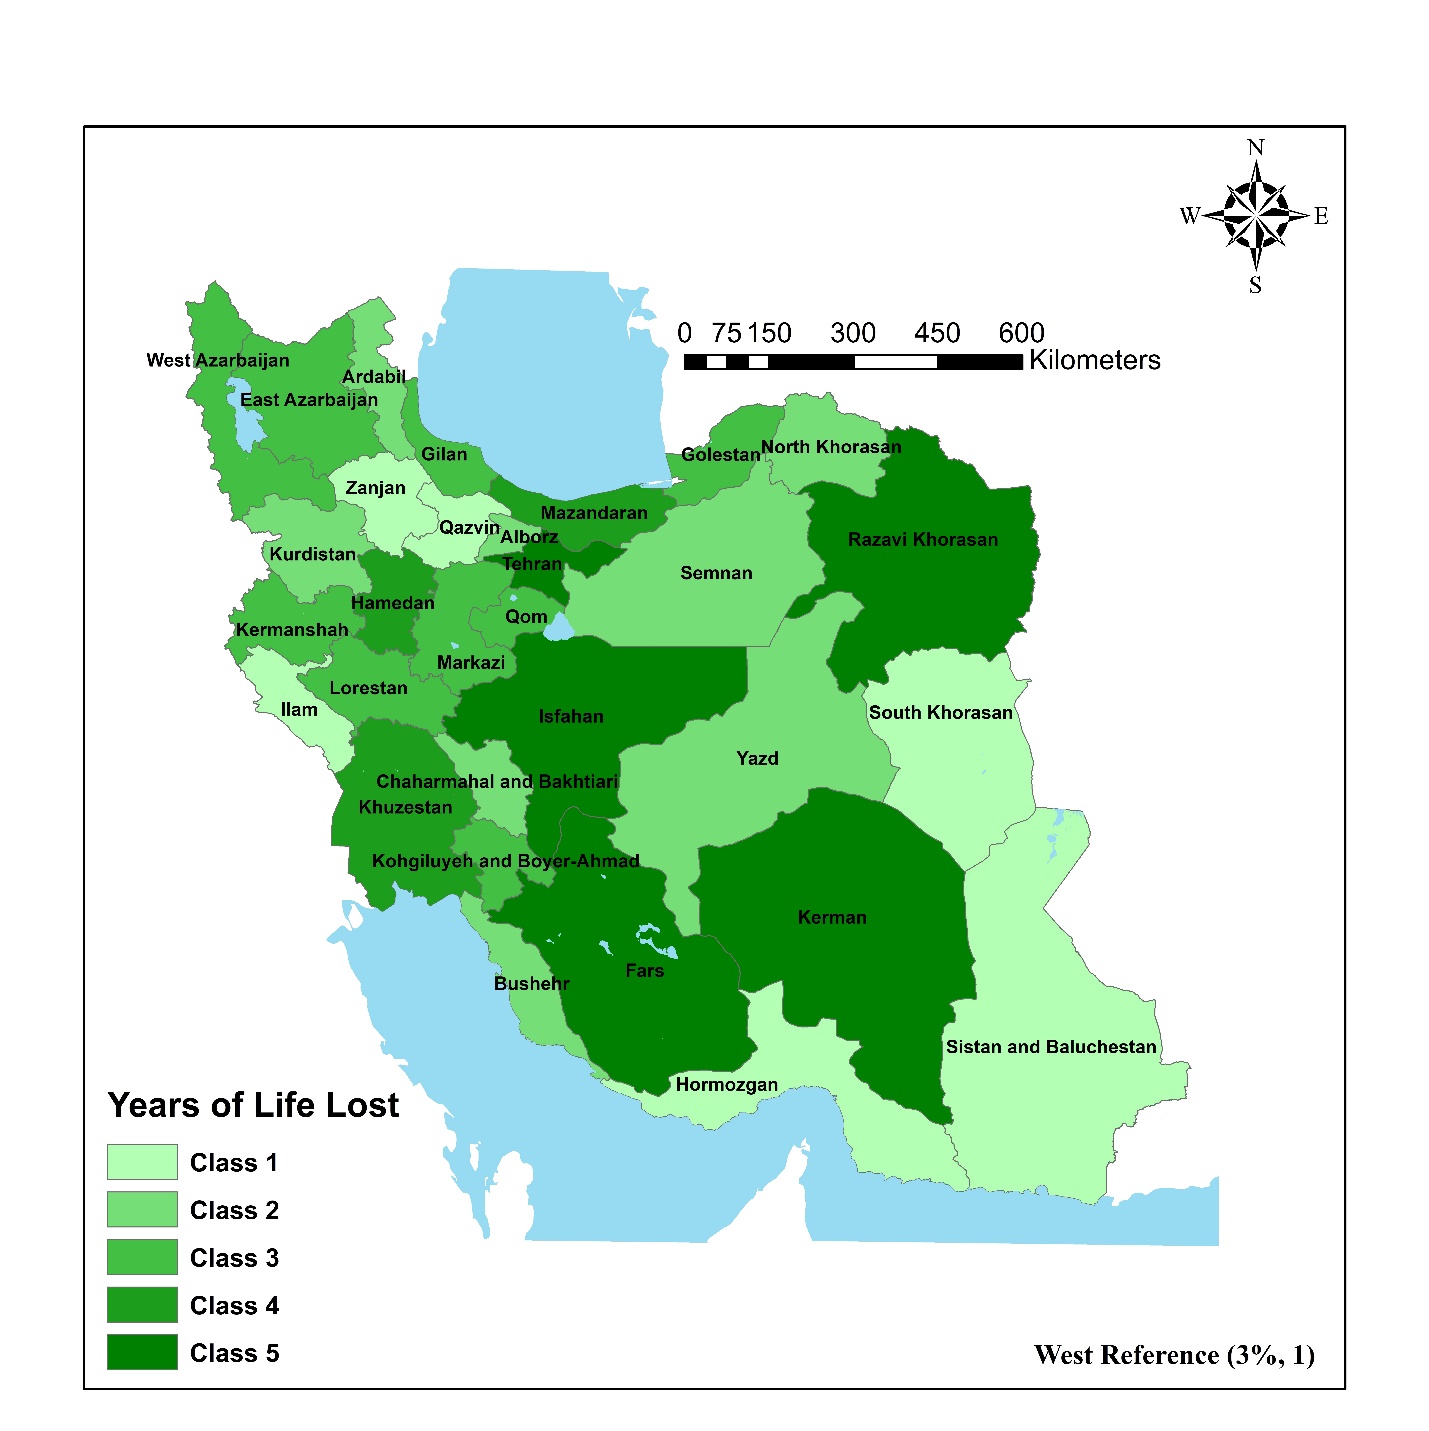


Supplementary Figure S20: Geographic Distribution of Years of Life Lost across Iranian Provinces using West Reference (3%, 1)


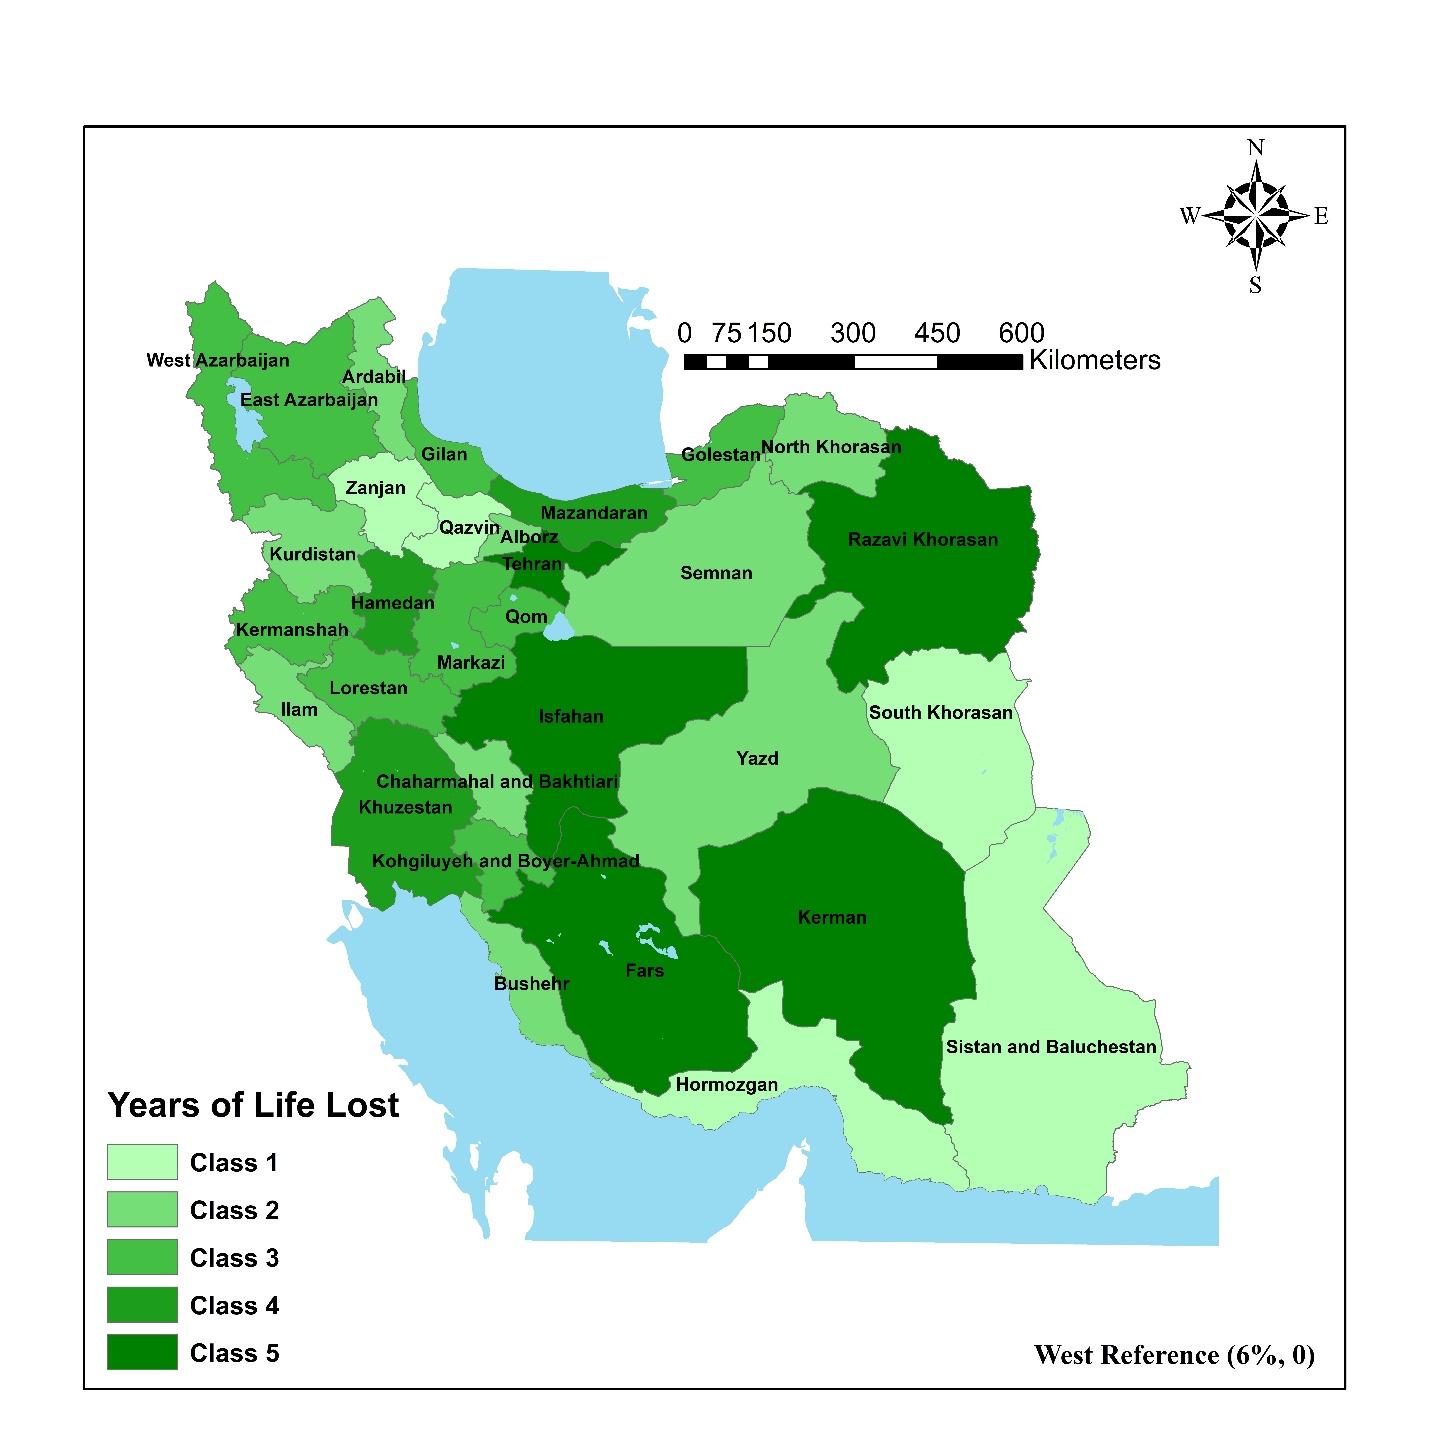


Supplementary Figure S21: Geographic Distribution of Years of Life Lost across Iranian Provinces using West Reference (6%, 0)


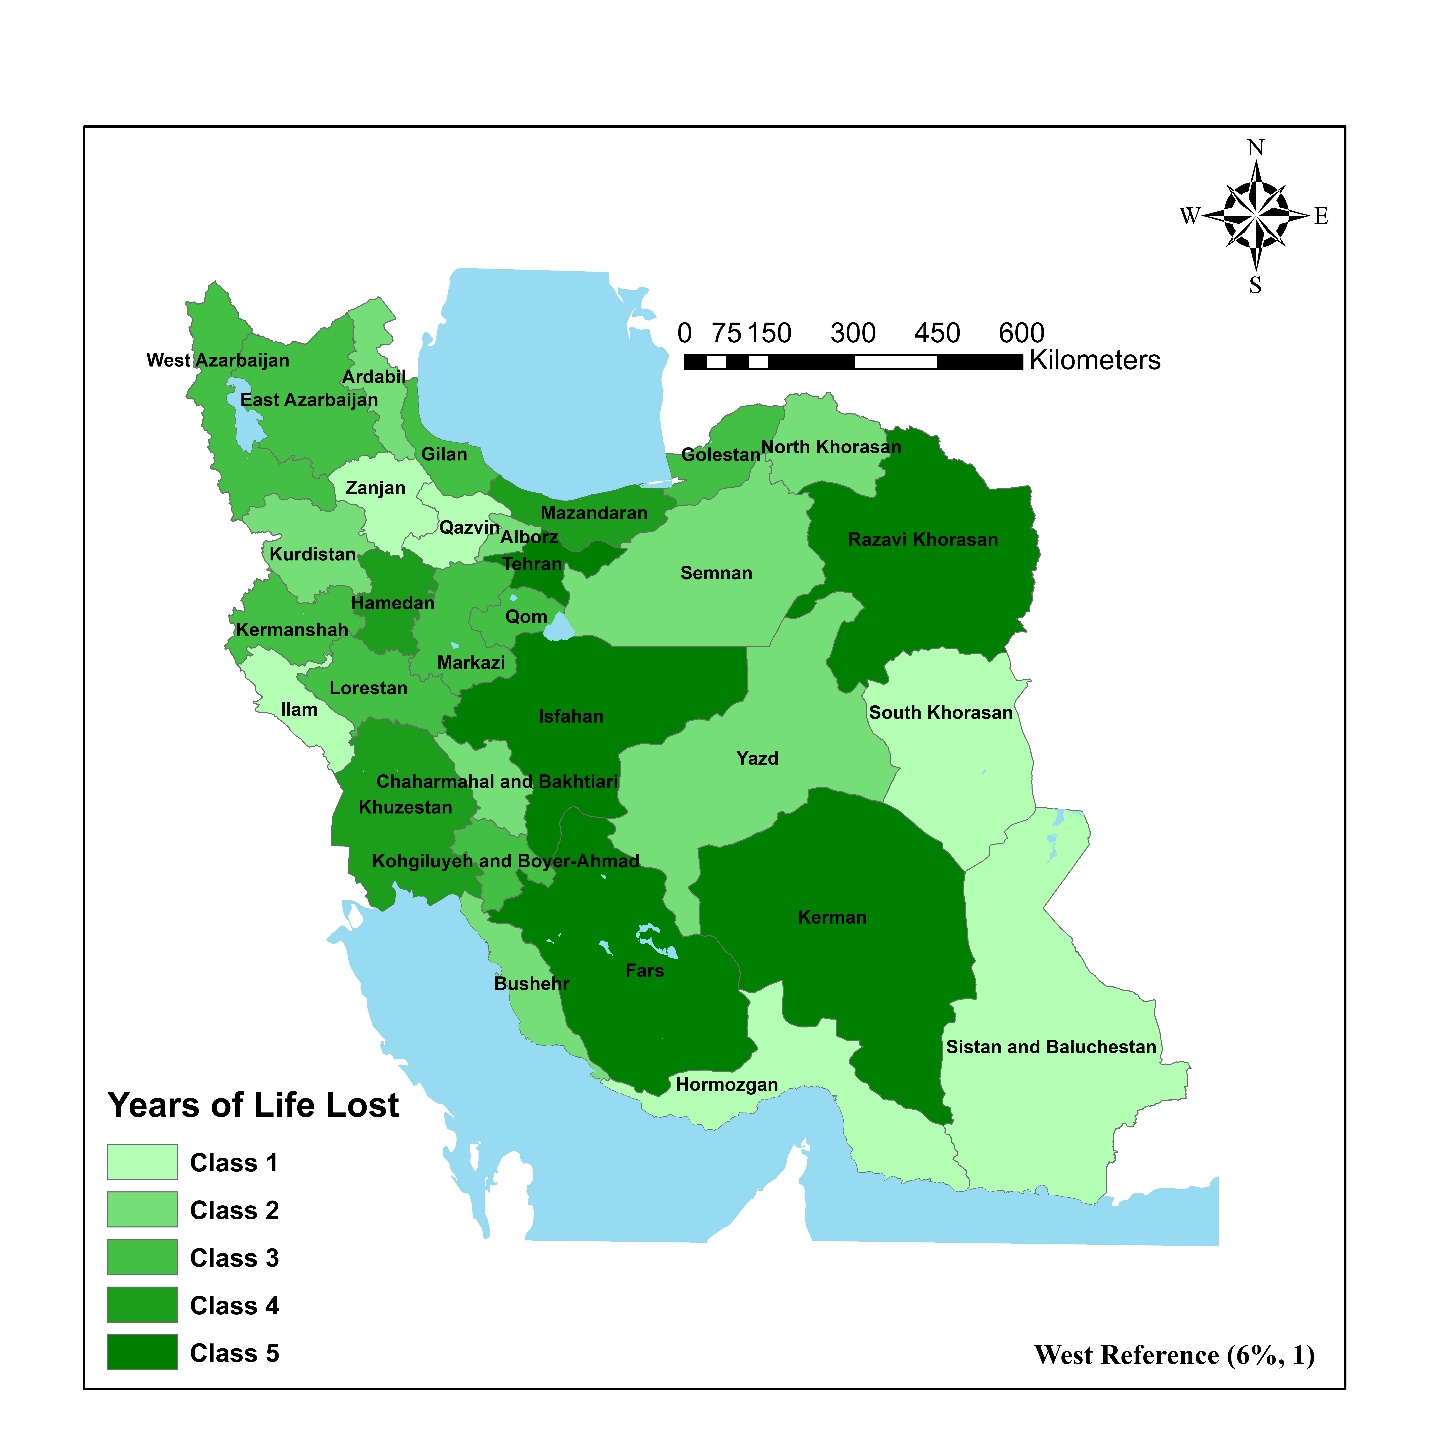


Supplementary Figure S22: Geographic Distribution of Years of Life Lost across Iranian Provinces using West Reference (6%, 1)
