# Supplementary material for: Years of Life Lost due to Premature Mortality Following Sulfur Mustard Exposure: A Post-War National Burden of Disease Study (1988-2021)
Source: Research Square preprint supplement (doi:10.21203/rs.3.rs-7847427/v1), 2025-11-14
Supplement: Supplementary file 2 [file df9745a756713effc38dbcac.docx]

Supplementary Table S1: Years of Life Lost by Age at Death using Iranian Reference (0%, 1)

| Age interval | Iranian Nationwide Life Table  (Discount Rate = 0%, Age Weighting = 1) | | | | | |
| --- | --- | --- | --- | --- | --- | --- |
| **Male** | | **Female** | | **Total** | |
| **YLL** | **Death** | **YLL** | **Death** | **YLL** | **Death** |
| 10-14 | 70.2 | 1 | 0.0 | 0 | 70.2 | 1 |
| 15-19 | 305.8 | 5 | 0.0 | 0 | 305.8 | 5 |
| 20-24 | 1,768.7 | 32 | 0.0 | 0 | 1,768.7 | 32 |
| 25-29 | 4,651.0 | 95 | 321.5 | 6 | 4,972.5 | 101 |
| 30-34 | 11,231.9 | 263 | 89.5 | 2 | 11,321.4 | 265 |
| 35-39 | 17,653.8 | 485 | 118.3 | 3 | 17,772.1 | 488 |
| 40-44 | 21,302.2 | 699 | 137.5 | 4 | 21,439.7 | 703 |
| 45-49 | 27,163.4 | 1,084 | 162.0 | 6 | 27,325.4 | 1,090 |
| 50-54 | 31,213.0 | 1,545 | 125.9 | 6 | 31,338.9 | 1,551 |
| 55-59 | 20,703.0 | 1,316 | 222.5 | 13 | 20,925.5 | 1,329 |
| 60-64 | 10,479.8 | 894 | 234.5 | 18 | 10,714.3 | 912 |
| 65-69 | 6,083.7 | 717 | 120.2 | 13 | 6,203.9 | 730 |
| 70-74 | 3,230.1 | 542 | 135.8 | 21 | 3,365.9 | 563 |
| 75+ | 3,060.4 | 1,122 | 127.3 | 64 | 3,187.7 | 1,186 |

Supplementary Table S2: Years of Life Lost by Age at Death using Iranian Reference (3%, 0)

| Age interval | Iranian Nationwide Life Table  (Discount Rate = 3%, Age Weighting = 0) | | | | | |
| --- | --- | --- | --- | --- | --- | --- |
| **Male** | | **Female** | | **Total** | |
| **YLL** | **Death** | **YLL** | **Death** | **YLL** | **Death** |
| 10-14 | 27.2 | 1 | 0.0 | 0 | 27.2 | 1 |
| 15-19 | 129.2 | 5 | 0.0 | 0 | 129.2 | 5 |
| 20-24 | 801.7 | 32 | 0.0 | 0 | 801.7 | 32 |
| 25-29 | 2,296.3 | 95 | 154.8 | 6 | 2,451.1 | 101 |
| 30-34 | 6,101.1 | 263 | 48.0 | 2 | 6,149.1 | 265 |
| 35-39 | 10,660.3 | 485 | 70.5 | 3 | 10,730.8 | 488 |
| 40-44 | 14,401.4 | 699 | 90.2 | 4 | 14,491.6 | 703 |
| 45-49 | 20,729.0 | 1,084 | 122.8 | 6 | 20,851.8 | 1,090 |
| 50-54 | 26,898.4 | 1,545 | 109.6 | 6 | 27,008.0 | 1,551 |
| 55-59 | 20,193.2 | 1,316 | 214.4 | 13 | 20,407.6 | 1,329 |
| 60-64 | 11,688.8 | 894 | 258.7 | 18 | 11,947.5 | 912 |
| 65-69 | 7,767.7 | 717 | 154.0 | 13 | 7,921.7 | 730 |
| 70-74 | 4,720.8 | 542 | 201.0 | 21 | 4,921.8 | 563 |
| 75+ | 5,863.6 | 1,122 | 253.2 | 64 | 6,116.8 | 1,186 |

Supplementary Table S3: Years of Life Lost by Age at Death using Iranian Reference (3%, 1)

| Age interval | Iranian Nationwide Life Table  (Discount Rate = 3%, Age Weighting = 1) | | | | | |
| --- | --- | --- | --- | --- | --- | --- |
| **Male** | | **Female** | | **Total** | |
| **YLL** | **Death** | **YLL** | **Death** | **YLL** | **Death** |
| 10-14 | 36.2 | 1 | 0.0 | 0 | 36.2 | 1 |
| 15-19 | 171.6 | 5 | 0.0 | 0 | 171.6 | 5 |
| 20-24 | 1,033.1 | 32 | 0.0 | 0 | 1,033.1 | 32 |
| 25-29 | 2,821.3 | 95 | 185.5 | 6 | 3,006.8 | 101 |
| 30-34 | 7,059.8 | 263 | 54.9 | 2 | 7,114.7 | 265 |
| 35-39 | 11,524.5 | 485 | 74.3 | 3 | 11,598.8 | 488 |
| 40-44 | 14,446.8 | 699 | 88.9 | 4 | 14,535.7 | 703 |
| 45-49 | 19,122.4 | 1,084 | 110.6 | 6 | 19,233.0 | 1,090 |
| 50-54 | 22,861.6 | 1,545 | 90.5 | 6 | 22,952.1 | 1,551 |
| 55-59 | 15,850.5 | 1,316 | 166.3 | 13 | 16,016.8 | 1,329 |
| 60-64 | 8,397.4 | 894 | 183.0 | 18 | 8,580.4 | 912 |
| 65-69 | 5,085.2 | 717 | 98.5 | 13 | 5,183.4 | 730 |
| 70-74 | 2,805.3 | 542 | 116.1 | 21 | 2,921.4 | 563 |
| 75+ | 2,819.1 | 1,122 | 118.0 | 64 | 2,937.1 | 1,186 |

Supplementary Table S4: Years of Life Lost by Age at Death using Iranian Reference (6%, 0)

| Age interval | Iranian Nationwide Life Table  (Discount Rate = 6%, Age Weighting = 0) | | | | | |
| --- | --- | --- | --- | --- | --- | --- |
| **Male** | | **Female** | | **Total** | |
| **YLL** | **Death** | **YLL** | **Death** | **YLL** | **Death** |
| 10-14 | 16.1 | 1 | 0.0 | 0 | 16.1 | 1 |
| 15-19 | 79.1 | 5 | 0.0 | 0 | 79.1 | 5 |
| 20-24 | 500.4 | 32 | 0.0 | 0 | 500.4 | 32 |
| 25-29 | 1,463.7 | 95 | 94.9 | 6 | 1,558.6 | 101 |
| 30-34 | 3,977.9 | 263 | 30.7 | 2 | 4,008.6 | 265 |
| 35-39 | 7,145.2 | 485 | 45.6 | 3 | 7,190.8 | 488 |
| 40-44 | 9,949.8 | 699 | 59.7 | 4 | 10,009.5 | 703 |
| 45-49 | 14,780.1 | 1,084 | 85.1 | 6 | 14,865.2 | 1,090 |
| 50-54 | 19,868.1 | 1,545 | 79.6 | 6 | 19,947.7 | 1,551 |
| 55-59 | 15,541.2 | 1,316 | 161.3 | 13 | 15,702.5 | 1,329 |
| 60-64 | 9,393.9 | 894 | 202.7 | 18 | 9,596.6 | 912 |
| 65-69 | 6,503.3 | 717 | 126.5 | 13 | 6,629.8 | 730 |
| 70-74 | 4,103.1 | 542 | 172.1 | 21 | 4,275.2 | 563 |
| 75+ | 5,402.8 | 1,122 | 234.3 | 64 | 5,637.1 | 1,186 |

Supplementary Table S5: Years of Life Lost by Age at Death using Iranian Reference (6%, 1)

| Age interval | Iranian Nationwide Life Table  (Discount Rate = 6%, Age Weighting = 1) | | | | | |
| --- | --- | --- | --- | --- | --- | --- |
| **Male** | | **Female** | | **Total** | |
| **YLL** | **Death** | **YLL** | **Death** | **YLL** | **Death** |
| 10-14 | 22.1 | 1 | 0.0 | 0 | 22.1 | 1 |
| 15-19 | 110.8 | 5 | 0.0 | 0 | 110.8 | 5 |
| 20-24 | 684.1 | 32 | 0.0 | 0 | 684.1 | 32 |
| 25-29 | 1,911.2 | 95 | 122.8 | 6 | 2,034.0 | 101 |
| 30-34 | 4,884.9 | 263 | 37.6 | 2 | 4,922.5 | 265 |
| 35-39 | 8,157.8 | 485 | 51.5 | 3 | 8,209.3 | 488 |
| 40-44 | 10,472.7 | 699 | 62.6 | 4 | 10,535.3 | 703 |
| 45-49 | 14,206.3 | 1,084 | 80.6 | 6 | 14,286.9 | 1,090 |
| 50-54 | 17,456.3 | 1,545 | 68.2 | 6 | 17,524.5 | 1,551 |
| 55-59 | 12,502.4 | 1,316 | 128.8 | 13 | 12,631.2 | 1,329 |
| 60-64 | 6,863.8 | 894 | 146.5 | 18 | 7,010.3 | 912 |
| 65-69 | 4,304.7 | 717 | 82.1 | 13 | 4,386.8 | 730 |
| 70-74 | 2,454.8 | 542 | 100.3 | 21 | 2,555.1 | 563 |
| 75+ | 2,603.3 | 1,122 | 109.6 | 64 | 2,712.9 | 1,186 |

Supplementary Table S6: Years of Life Lost by Age at Death using West Reference (0%, 0)

| Age interval | Coale-Demeny Model Life Table West  (Discount Rate = 0%, Age Weighting = 0) | | | | | |
| --- | --- | --- | --- | --- | --- | --- |
| **Male** | | **Female** | | **Total** | |
| **YLL** | **Death** | **YLL** | **Death** | **YLL** | **Death** |
| 10-14 | 69.4 | 1 | 0.0 | 0 | 69.4 | 1 |
| 15-19 | 312.1 | 5 | 0.0 | 0 | 312.1 | 5 |
| 20-24 | 1,852.6 | 32 | 0.0 | 0 | 1,852.6 | 32 |
| 25-29 | 5,043.5 | 95 | 337.3 | 6 | 5,380.7 | 101 |
| 30-34 | 12,699.2 | 263 | 102.6 | 2 | 12,801.9 | 265 |
| 35-39 | 21,061.2 | 485 | 139.3 | 3 | 21,200.5 | 488 |
| 40-44 | 26,968.8 | 699 | 169.3 | 4 | 27,138.1 | 703 |
| 45-49 | 36,513.7 | 1,084 | 220.0 | 6 | 36,733.8 | 1,090 |
| 50-54 | 44,935.6 | 1,545 | 189.2 | 6 | 45,124.7 | 1,551 |
| 55-59 | 32,475.0 | 1,316 | 363.6 | 13 | 32,838.7 | 1,329 |
| 60-64 | 18,046.5 | 894 | 420.6 | 18 | 18,467.1 | 912 |
| 65-69 | 11,479.7 | 717 | 242.0 | 13 | 11,721.7 | 730 |
| 70-74 | 6,687.9 | 542 | 301.0 | 21 | 6,988.9 | 563 |
| 75+ | 7,881.1 | 1,122 | 439.8 | 64 | 8,320.9 | 1,186 |

Supplementary Table S7: Years of Life Lost by Age at Death using West Reference (0%, 1)

| Age interval | Coale-Demeny Model Life Table West  (Discount Rate = 0%, Age Weighting = 1) | | | | | |
| --- | --- | --- | --- | --- | --- | --- |
| **Male** | | **Female** | | **Total** | |
| **YLL** | **Death** | **YLL** | **Death** | **YLL** | **Death** |
| 10-14 | 78.6 | 1 | 0.0 | 0 | 78.6 | 1 |
| 15-19 | 346.2 | 5 | 0.0 | 0 | 346.2 | 5 |
| 20-24 | 1,998.6 | 32 | 0.0 | 0 | 1,998.6 | 32 |
| 25-29 | 5,235.7 | 95 | 342.7 | 6 | 5,578.4 | 101 |
| 30-34 | 12,590.0 | 263 | 99.4 | 2 | 12,689.4 | 265 |
| 35-39 | 19,807.4 | 485 | 127.7 | 3 | 19,935.0 | 488 |
| 40-44 | 23,938.4 | 699 | 147.4 | 4 | 24,085.8 | 703 |
| 45-49 | 30,404.7 | 1,084 | 177.5 | 6 | 30,582.1 | 1,090 |
| 50-54 | 35,055.4 | 1,545 | 141.5 | 6 | 35,196.9 | 1,551 |
| 55-59 | 23,677.3 | 1,316 | 257.1 | 13 | 23,934.4 | 1,329 |
| 60-64 | 12,200.4 | 894 | 275.4 | 18 | 12,475.8 | 912 |
| 65-69 | 7,166.2 | 717 | 145.3 | 13 | 7,311.5 | 730 |
| 70-74 | 3,834.7 | 542 | 165.8 | 21 | 4,000.5 | 563 |
| 75+ | 3,843.1 | 1,122 | 202.4 | 64 | 4,045.5 | 1,186 |

Supplementary Table S8: Years of Life Lost by Age at Death using West Reference (3%, 0)

| Age interval | Coale-Demeny Model Life Table West  (Discount Rate = 3%, Age Weighting = 0) | | | | | |
| --- | --- | --- | --- | --- | --- | --- |
| **Male** | | **Female** | | **Total** | |
| **YLL** | **Death** | **YLL** | **Death** | **YLL** | **Death** |
| 10-14 | 29.2 | 1 | 0.0 | 0 | 29.2 | 1 |
| 15-19 | 141.1 | 5 | 0.0 | 0 | 141.1 | 5 |
| 20-24 | 878.8 | 32 | 0.0 | 0 | 878.8 | 32 |
| 25-29 | 2,522.4 | 95 | 162.9 | 6 | 2,685.4 | 101 |
| 30-34 | 6,707.0 | 263 | 52.3 | 2 | 6,759.3 | 265 |
| 35-39 | 11,772.3 | 485 | 75.2 | 3 | 11,847.5 | 488 |
| 40-44 | 15,976.3 | 699 | 95.9 | 4 | 16,072.2 | 703 |
| 45-49 | 22,978.2 | 1,084 | 133.4 | 6 | 23,111.6 | 1,090 |
| 50-54 | 29,977.5 | 1,545 | 122.2 | 6 | 30,099.8 | 1,551 |
| 55-59 | 22,943.4 | 1,316 | 246.0 | 13 | 23,189.4 | 1,329 |
| 60-64 | 13,536.2 | 894 | 302.2 | 18 | 13,838.4 | 912 |
| 65-69 | 9,115.3 | 717 | 185.4 | 13 | 9,300.7 | 730 |
| 70-74 | 5,589.3 | 542 | 244.5 | 21 | 5,833.8 | 563 |
| 75+ | 7,046.1 | 1,122 | 390.6 | 64 | 7,436.7 | 1,186 |

Supplementary Table S9: Years of Life Lost by Age at Death using West Reference (3%, 1)

| Age interval | Coale-Demeny Model Life Table West  (Discount Rate = 3%, Age Weighting = 1) | | | | | |
| --- | --- | --- | --- | --- | --- | --- |
| **Male** | | **Female** | | **Total** | |
| **YLL** | **Death** | **YLL** | **Death** | **YLL** | **Death** |
| 10-14 | 37.4 | 1 | 0.0 | 0 | 37.4 | 1 |
| 15-19 | 179.2 | 5 | 0.0 | 0 | 179.2 | 5 |
| 20-24 | 1,081.8 | 32 | 0.0 | 0 | 1081.8 | 32 |
| 25-29 | 2,961.1 | 95 | 189.9 | 6 | 3151.0 | 101 |
| 30-34 | 7,425.8 | 263 | 57.4 | 2 | 7,483.2 | 265 |
| 35-39 | 12,184.1 | 485 | 76.8 | 3 | 12,260.9 | 488 |
| 40-44 | 15,365.2 | 699 | 91.9 | 4 | 15,457.0 | 703 |
| 45-49 | 20,406.3 | 1,084 | 116.2 | 6 | 20,522.4 | 1,090 |
| 50-54 | 24,588.6 | 1,545 | 97.1 | 6 | 24,685.6 | 1,551 |
| 55-59 | 17,366.4 | 1,316 | 182.5 | 13 | 17,548.9 | 1,329 |
| 60-64 | 9,391.7 | 894 | 204.9 | 18 | 9,596.6 | 912 |
| 65-69 | 5,786.7 | 717 | 113.9 | 13 | 5,900.6 | 730 |
| 70-74 | 3,237.8 | 542 | 136.6 | 21 | 3,374.4 | 563 |
| 75+ | 3,443.3 | 1,122 | 180.1 | 64 | 3,623.4 | 1,186 |

Supplementary Table S10: Years of Life Lost by Age at Death using West Reference (6%, 0)

| Age interval | Coale-Demeny Model Life Table West  (Discount Rate = 6%, Age Weighting = 0) | | | | | |
| --- | --- | --- | --- | --- | --- | --- |
| **Male** | | **Female** | | **Total** | |
| **YLL** | **Death** | **YLL** | **Death** | **YLL** | **Death** |
| 10-14 | 16.4 | 1 | 0.0 | 0 | 16.4 | 1 |
| 15-19 | 81.4 | 5 | 0.0 | 0 | 81.4 | 5 |
| 20-24 | 516.8 | 32 | 0.0 | 0 | 516.8 | 32 |
| 25-29 | 1,517.8 | 95 | 96.6 | 6 | 1,614.3 | 101 |
| 30-34 | 4,141.3 | 263 | 31.8 | 2 | 4,173.1 | 265 |
| 35-39 | 7,486.0 | 485 | 46.9 | 3 | 7,532.9 | 488 |
| 40-44 | 10,498.7 | 699 | 61.4 | 4 | 10,560.1 | 703 |
| 45-49 | 15,671.4 | 1,084 | 88.9 | 6 | 15,760.3 | 1,090 |
| 50-54 | 21,252.3 | 1,545 | 84.9 | 6 | 21,337.2 | 1,551 |
| 55-59 | 16,943.2 | 1,316 | 176.1 | 13 | 17,119.3 | 1,329 |
| 60-64 | 10,461.7 | 894 | 226.0 | 18 | 10,687.7 | 912 |
| 65-69 | 7,376.8 | 717 | 145.7 | 13 | 7,522.4 | 730 |
| 70-74 | 4,724.5 | 542 | 201.7 | 21 | 4,926.2 | 563 |
| 75+ | 6,332.4 | 1,122 | 349.0 | 64 | 6,681.4 | 1,186 |

Supplementary Table S11: Years of Life Lost by Age at Death using West Reference (6%, 1)

| Age interval | Coale-Demeny Model Life Table West  (Discount Rate = 6%, Age Weighting = 1) | | | | | |
| --- | --- | --- | --- | --- | --- | --- |
| **Male** | | **Female** | | **Total** | |
| **YLL** | **Death** | **YLL** | **Death** | **YLL** | **Death** |
| 10-14 | 22.3 | 1 | 0.0 | 0 | 22.3 | 1 |
| 15-19 | 112.3 | 5 | 0.0 | 0 | 112.3 | 5 |
| 20-24 | 694.5 | 32 | 0.0 | 0 | 694.5 | 32 |
| 25-29 | 1,944.8 | 95 | 123.7 | 6 | 2,068.6 | 101 |
| 30-34 | 4,984.1 | 263 | 38.2 | 2 | 5,022.2 | 265 |
| 35-39 | 8,360.8 | 485 | 52.2 | 3 | 8,412.9 | 488 |
| 40-44 | 10,793.8 | 699 | 63.5 | 4 | 10,857.3 | 703 |
| 45-49 | 14,716.2 | 1,084 | 82.6 | 6 | 14,798.8 | 1,090 |
| 50-54 | 18,234.0 | 1,545 | 71.0 | 6 | 18,304.9 | 1,551 |
| 55-59 | 13,276.3 | 1,316 | 136.5 | 13 | 13,412.8 | 1,329 |
| 60-64 | 7,439.2 | 894 | 158.3 | 18 | 7,597.5 | 912 |
| 65-69 | 4,759.7 | 717 | 91.5 | 13 | 4,851.2 | 730 |
| 70-74 | 2,764.4 | 542 | 114.2 | 21 | 2,878.6 | 563 |
| 75+ | 3,101.1 | 1,122 | 161.3 | 64 | 3,262.4 | 1,186 |

Supplementary Table S12: Years of Life Lost by Injury Severity using Iranian Reference (0%, 1)

| Severity | Type | Iranian Nationwide Life Table  (Discount Rate = 0%, Age Weighting = 1) | | | | | | | | | | |
| --- | --- | --- | --- | --- | --- | --- | --- | --- | --- | --- | --- | --- |
| **Male** | | | | | | **Female** | | | | |
| **YLL**  **(N)** | **YLL (%)** | **Death (N)** | **Death (%)** | **YLL (Avg.)** | **YLL (N)** | | **YLL (%)** | **Death (N)** | **Death (%)** | **YLL (Avg.)** | |
| Lung | **Subclinical** | 82,671.3 | 54.3 | 4,255 | 49.6 | 19.4 | 458.9 | | 26.1 | 45 | 29.6 | 10.2 | |
| **Mild** | 51,467.5 | 33.3 | 3,058 | 35.7 | 16.8 | 915.7 | | 52.0 | 78 | 51.3 | 11.7 | |
| **Moderate** | 17,214.3 | 11.1 | 1,073 | 12.5 | 16.0 | 254.9 | | 14.5 | 25 | 16.4 | 10.2 | |
| **Severe** | 3,382.2 | 2.2 | 187 | 2.2 | 18.1 | 131.9 | | 7.5 | 4 | 2.6 | 33.0 | |
| Eye | **Subclinical** | 139,916.2 | 88.5 | 7,634 | 87.2 | 18.3 | 1,064.1 | | 85.0 | 133 | 85.8 | 8.0 | |
| **Mild** | 17,101.8 | 10.8 | 1,049 | 12.0 | 16.3 | 187.8 | | 15.0 | 22 | 14.2 | 8.5 | |
| **Moderate** | 478.0 | 0.3 | 33 | 0.4 | 14.5 | 0.0 | | 0.0 | 0 | 0.0 | - | |
| **Severe** | 523.6 | 0.3 | 34 | 0.4 | 15.4 | 0.0 | | 0.0 | 0 | 0.0 | - | |
| Skin | **Subclinical** | 141,295.6 | 89.9 | 7,791 | 89.5 | 18.1 | 1,562.9 | | 88.2 | 128 | 83.1 | 12.2 | |
| **Mild** | 13,996.8 | 8.9 | 792 | 9.1 | 17.7 | 151.8 | | 8.6 | 19 | 12.3 | 8.0 | |
| **Moderate** | 1,575.9 | 1.0 | 101 | 1.2 | 15.6 | 58.2 | | 3.3 | 7 | 4.5 | 8.3 | |
| **Severe** | 274.6 | 0.2 | 20 | 0.2 | 13.7 | 0.0 | | 0.0 | 0 | 0.0 | - | |

Supplementary Table S13: Years of Life Lost by Injury Severity using Iranian Reference (3%, 0)

| Severity | Type | Iranian Nationwide Life Table  (Discount Rate = 3%, Age Weighting = 0) | | | | | | | | | | |
| --- | --- | --- | --- | --- | --- | --- | --- | --- | --- | --- | --- | --- |
| **Male** | | | | | | **Female** | | | | |
| **YLL**  **(N)** | **YLL (%)** | **Death (N)** | **Death (%)** | **YLL (Avg.)** | **YLL (N)** | | **YLL (%)** | **Death (N)** | **Death (%)** | **YLL (Avg.)** | |
| Lung | **Subclinical** | 66,439.8 | 51.6 | 4,255 | 49.6 | 15.6 | 435.2 | | 26.7 | 45 | 29.6 | 9.7 | |
| **Mild** | 44,605.6 | 34.6 | 3,058 | 35.7 | 14.6 | 854.3 | | 52.4 | 78 | 51.3 | 11.0 | |
| **Moderate** | 14,985.9 | 11.6 | 1,073 | 12.5 | 14.0 | 255.5 | | 15.7 | 25 | 16.4 | 10.2 | |
| **Severe** | 2,805.3 | 2.2 | 187 | 2.2 | 15.0 | 84.5 | | 5.2 | 4 | 2.6 | 21.1 | |
| Eye | **Subclinical** | 115,568.9 | 87.9 | 7,634 | 87.2 | 15.1 | 1,461.6 | | 87.5 | 133 | 85.8 | 11.0 | |
| **Mild** | 15,060.2 | 11.4 | 1,049 | 12.0 | 14.4 | 208.3 | | 12.5 | 22 | 14.2 | 9.5 | |
| **Moderate** | 437.2 | 0.3 | 33 | 0.4 | 13.2 | 0.0 | | 0.0 | 0 | 0.0 | - | |
| **Severe** | 478.5 | 0.4 | 34 | 0.4 | 14.1 | 0.0 | | 0.0 | 0 | 0.0 | - | |
| Skin | **Subclinical** | 117,551.6 | 89.9 | 7,791 | 89.5 | 15.1 | 1,407.9 | | 85.4 | 128 | 83.1 | 11.0 | |
| **Mild** | 11,645.7 | 8.9 | 792 | 9.1 | 14.7 | 176.7 | | 10.7 | 19 | 12.3 | 9.3 | |
| **Moderate** | 1,373.5 | 1.0 | 101 | 1.2 | 13.6 | 64.8 | | 3.9 | 7 | 4.5 | 9.3 | |
| **Severe** | 251.6 | 0.2 | 20 | 0.2 | 12.6 | 0.0 | | 0.0 | 0 | 0.0 | - | |

Supplementary Table S14: Years of Life Lost by Injury Severity using Iranian Reference (3%, 1)

| Severity | Type | Iranian Nationwide Life Table  (Discount Rate = 3%, Age Weighting = 1) | | | | | | | | | | |
| --- | --- | --- | --- | --- | --- | --- | --- | --- | --- | --- | --- | --- |
| **Male** | | | | | | **Female** | | | | |
| **YLL**  **(N)** | **YLL (%)** | **Death (N)** | **Death (%)** | **YLL (Avg.)** | **YLL (N)** | | **YLL (%)** | **Death (N)** | **Death (%)** | **YLL (Avg.)** | |
| Lung | **Subclinical** | 58,648.5 | 52.8 | 4,255 | 49.6 | 13.8 | 330.8 | | 26.3 | 45 | 29.6 | 7.4 | |
| **Mild** | 37,434.9 | 33.7 | 3,058 | 35.7 | 12.2 | 654.3 | | 52.0 | 78 | 51.3 | 8.4 | |
| **Moderate** | 12,537.5 | 11.3 | 1,073 | 12.5 | 11.7 | 188.3 | | 15.0 | 25 | 16.4 | 7.5 | |
| **Severe** | 2,427.4 | 2.2 | 187 | 2.2 | 13.0 | 85.1 | | 6.8 | 4 | 2.6 | 21.3 | |
| Eye | **Subclinical** | 100,164.9 | 88.3 | 7,634 | 87.2 | 13.1 | 1,139.6 | | 88.8 | 133 | 85.8 | 8.6 | |
| **Mild** | 12,489.3 | 11.0 | 1,049 | 12.0 | 11.9 | 144 | | 11.2 | 22 | 14.2 | 6.5 | |
| **Moderate** | 353.9 | 0.3 | 33 | 0.4 | 10.7 | 0.0 | | 0.0 | 0 | 0.0 | - | |
| **Severe** | 388.3 | 0.3 | 34 | 0.4 | 11.4 | 0.0 | | 0.0 | 0 | 0.0 | - | |
| Skin | **Subclinical** | 101,385.4 | 89.9 | 7,791 | 89.5 | 13.0 | 1,104.5 | | 87.1 | 128 | 83.1 | 8.6 | |
| **Mild** | 10,036.5 | 8.9 | 792 | 9.1 | 12.7 | 119 | | 9.4 | 19 | 12.3 | 6.3 | |
| **Moderate** | 1,148.4 | 1.0 | 101 | 1.2 | 11.4 | 45.3 | | 3.6 | 7 | 4.5 | 6.5 | |
| **Severe** | 201.8 | 0.2 | 20 | 0.2 | 10.1 | 0.0 | | 0.0 | 0 | 0.0 | - | |

Supplementary Table S15: Years of Life Lost by Injury Severity using Iranian Reference (6%, 0)

| Severity | Type | Iranian Nationwide Life Table  (Discount Rate = 6%, Age Weighting = 0) | | | | | | | | | | |
| --- | --- | --- | --- | --- | --- | --- | --- | --- | --- | --- | --- | --- |
| **Male** | | | | | | **Female** | | | | |
| **YLL**  **(N)** | **YLL (%)** | **Death (N)** | **Death (%)** | **YLL (Avg.)** | **YLL (N)** | | **YLL (%)** | **Death (N)** | **Death (%)** | **YLL (Avg.)** | |
| Lung | **Subclinical** | 49,107.7 | 51.1 | 4,255 | 49.6 | 11.5 | 335.5 | | 26.8 | 45 | 29.6 | 7.5 | |
| **Mild** | 33,598.1 | 34.9 | 3,058 | 35.7 | 11.0 | 657.6 | | 52.6 | 78 | 51.3 | 8.4 | |
| **Moderate** | 11,358.8 | 11.8 | 1,073 | 12.5 | 10.6 | 200.9 | | 16.1 | 25 | 16.4 | 8.0 | |
| **Severe** | 2,093.7 | 2.2 | 187 | 2.2 | 11.2 | 57 | | 4.6 | 4 | 2.6 | 14.3 | |
| Eye | **Subclinical** | 86,084.4 | 87.7 | 7,634 | 87.2 | 11.3 | 1,118.6 | | 87.0 | 133 | 85.8 | 8.4 | |
| **Mild** | 11,393.3 | 11.6 | 1,049 | 12.0 | 10.9 | 166.8 | | 13.0 | 22 | 14.2 | 7.6 | |
| **Moderate** | 335.1 | 0.3 | 33 | 0.4 | 10.2 | 0.0 | | 0.0 | 0 | 0.0 | - | |
| **Severe** | 365.5 | 0.4 | 34 | 0.4 | 10.8 | 0.0 | | 0.0 | 0 | 0.0 | - | |
| Skin | **Subclinical** | 87,710.7 | 89.8 | 7,791 | 89.5 | 11.3 | 1,073.7 | | 84.6 | 128 | 83.1 | 8.4 | |
| **Mild** | 8,691.2 | 8.9 | 792 | 9.1 | 11.0 | 144 | | 11.3 | 19 | 12.3 | 7.6 | |
| **Moderate** | 1,039.4 | 1.1 | 101 | 1.2 | 10.3 | 51.4 | | 4.1 | 7 | 4.5 | 7.3 | |
| **Severe** | 194.9 | 0.2 | 20 | 0.2 | 9.7 | 0.0 | | 0.0 | 0 | 0.0 | - | |

Supplementary Table S16: Years of Life Lost by Injury Severity using Iranian Reference (6%, 1)

| Severity | Type | Iranian Nationwide Life Table  (Discount Rate = 6%, Age Weighting = 1) | | | | | | | | | | | |
| --- | --- | --- | --- | --- | --- | --- | --- | --- | --- | --- | --- | --- | --- |
| **Male** | | | | | | **Female** | | | | | |
| **YLL**  **(N)** | **YLL (%)** | **Death (N)** | **Death (%)** | **YLL (Avg.)** | **YLL (N)** | | **YLL (%)** | **Death (N)** | **Death (%)** | **YLL (Avg.)** |
| Lung | **Subclinical** | 44,208.2 | 52.4 | 4,255 | 49.6 | 10.4 | 255.8 | | 26.5 | 45 | 29.6 | 5.7 |
| **Mild** | 28,686.4 | 34.0 | 3,058 | 35.7 | 9.4 | 502.7 | | 52.0 | 78 | 51.3 | 6.4 |
| **Moderate** | 9,632.6 | 11.4 | 1,073 | 12.5 | 9.0 | 147.9 | | 15.3 | 25 | 16.4 | 5.9 |
| **Severe** | 1,844.4 | 2.2 | 187 | 2.2 | 9.9 | 60.2 | | 6.2 | 4 | 2.6 | 15.1 |
| Eye | **Subclinical** | 75,974.7 | 88.2 | 7,634 | 87.2 | 10.0 | 872.2 | | 88.3 | 133 | 85.8 | 6.6 |
| **Mild** | 9,601.7 | 11.1 | 1,049 | 12.0 | 9.2 | 115.5 | | 11.7 | 22 | 14.2 | 5.3 |
| **Moderate** | 274.8 | 0.3 | 33 | 0.4 | 8.3 | 0.0 | | 0.0 | 0 | 0.0 | - |
| **Severe** | 301.5 | 0.3 | 34 | 0.4 | 8.9 | 0.0 | | 0.0 | 0 | 0.0 | - |
| Skin | **Subclinical** | 77,018.2 | 89.9 | 7,791 | 89.5 | 9.9 | 842.5 | | 86.3 | 128 | 83.1 | 6.6 |
| **Mild** | 7,621.6 | 8.9 | 792 | 9.1 | 9.6 | 97.0 | | 9.9 | 19 | 12.3 | 5.1 |
| **Moderate** | 8,81.7 | 1.0 | 101 | 1.2 | 8.7 | 36.3 | | 3.7 | 7 | 4.5 | 5.2 |
| **Severe** | 156.9 | 0.2 | 20 | 0.2 | 7.8 | 0.0 | | 0.0 | 0 | 0.0 | - |

Supplementary Table S17: Years of Life Lost by Injury Severity using West Reference (0%, 0)

| Severity | Type | Coale-Demeny Model Life Table West  (Discount Rate = 0%, Age Weighting = 0) | | | | | | | | | | |
| --- | --- | --- | --- | --- | --- | --- | --- | --- | --- | --- | --- | --- |
| **Male** | | | | | | **Female** | | | | |
| **YLL**  **(N)** | **YLL (%)** | **Death (N)** | **Death (%)** | **YLL (Avg.)** | **YLL (N)** | | **YLL (%)** | **Death (N)** | **Death (%)** | **YLL (Avg.)** |
| Lung | **Subclinical** | 115,226.6 | 52.4 | 4,255 | 49.6 | 27.1 | 773.8 | | 27.1 | 45 | 29.6 | 17.2 |
| **Mild** | 74,794.0 | 34.0 | 3,058 | 35.7 | 24.5 | 1,470.2 | | 51.6 | 78 | 51.3 | 18.8 |
| **Moderate** | 25,264.5 | 11.5 | 1,073 | 12.5 | 23.5 | 441.4 | | 15.5 | 25 | 16.4 | 17.7 |
| **Severe** | 4,814.8 | 2.2 | 187 | 2.2 | 25.7 | 165.1 | | 5.8 | 4 | 2.6 | 41.3 |
| Eye | **Subclinical** | 198,219.0 | 88.2 | 7,634 | 87.2 | 26.0 | 2,565.0 | | 88.0 | 133 | 85.8 | 19.3 |
| **Mild** | 25,032.9 | 11.1 | 1,049 | 12.0 | 23.9 | 349.5 | | 12.0 | 22 | 14.2 | 15.9 |
| **Moderate** | 720.9 | 0.3 | 33 | 0.4 | 21.8 | 0.0 | | 0.0 | 0 | 0.0 | - |
| **Severe** | 786.8 | 0.4 | 34 | 0.4 | 23.1 | 0.0 | | 0.0 | 0 | 0.0 | - |
| Skin | **Subclinical** | 200,880.0 | 89.9 | 7,791 | 89.5 | 25.8 | 2,473.0 | | 85.9 | 128 | 83.1 | 19.3 |
| **Mild** | 19,909.0 | 8.9 | 792 | 9.1 | 25.1 | 295.8 | | 10.3 | 19 | 12.3 | 15.6 |
| **Moderate** | 2,310.3 | 1.0 | 101 | 1.2 | 22.9 | 111.6 | | 3.9 | 7 | 4.5 | 15.9 |
| **Severe** | 411.3 | 0.2 | 20 | 0.2 | 20.6 | 0.0 | | 0.0 | 0 | 0.0 | - |

Supplementary Table S18: Years of Life Lost by Injury Severity using West Reference (0%, 1)

| Severity | Type | Coale-Demeny Model Life Table West  (Discount Rate = 0%, Age Weighting = 1) | | | | | | | | | | |
| --- | --- | --- | --- | --- | --- | --- | --- | --- | --- | --- | --- | --- |
| **Male** | | | | | | **Female** | | | | |
| **YLL**  **(N)** | **YLL (%)** | **Death (N)** | **Death (%)** | **YLL (Avg.)** | **YLL (N)** | | **YLL (%)** | **Death (N)** | **Death (%)** | **YLL (Avg.)** | |
| Lung | **Subclinical** | 93,646.1 | 53.4 | 4,255 | 49.6 | 22.0 | 540.6 | | 26.5 | 45 | 29.6 | 12.0 | |
| **Mild** | 58,285.7 | 33.2 | 3,058 | 35.7 | 19.1 | 1,049.3 | | 51.5 | 78 | 51.3 | 13.5 | |
| **Moderate** | 19,642.6 | 11.2 | 1,073 | 12.5 | 18.3 | 300.9 | | 14.8 | 25 | 16.4 | 12.0 | |
| **Severe** | 3,844.6 | 2.2 | 187 | 2.2 | 20.6 | 146.1 | | 7.2 | 4 | 2.6 | 36.5 | |
| Eye | **Subclinical** | 158,679.2 | 88.6 | 7,634 | 87.2 | 20.8 | 1,852.8 | | 89.2 | 133 | 85.8 | 13.9 | |
| **Mild** | 19,337.5 | 10.8 | 1,049 | 12.0 | 18.4 | 224.5 | | 10.8 | 22 | 14.2 | 10.2 | |
| **Moderate** | 544.4 | 0.3 | 33 | 0.4 | 16.5 | 0.0 | | 0.0 | 0 | 0.0 | - | |
| **Severe** | 594.7 | 0.3 | 34 | 0.4 | 17.5 | 0.0 | | 0.0 | 0 | 0.0 | - | |
| Skin | **Subclinical** | 160,184.3 | 89.9 | 7,791 | 89.5 | 20.6 | 1,797.5 | | 87.5 | 128 | 83.1 | 14.0 | |
| **Mild** | 15,863.4 | 8.9 | 792 | 9.1 | 20.0 | 185.6 | | 9.0 | 19 | 12.3 | 9.8 | |
| **Moderate** | 1,792.3 | 1.0 | 101 | 1.2 | 17.7 | 70.8 | | 3.4 | 7 | 4.5 | 10.1 | |
| **Severe** | 311.4 | 0.2 | 20 | 0.2 | 15.6 | 0.0 | | 0.0 | 0 | 0.0 | - | |

Supplementary Table S19: Years of Life Lost by Injury Severity using West Reference (3%, 0)

| Severity | Type | Coale-Demeny Model Life Table West  (Discount Rate = 3%, Age Weighting = 0) | | | | | | | | | | |
| --- | --- | --- | --- | --- | --- | --- | --- | --- | --- | --- | --- | --- |
| **Male** | | | | | | **Female** | | | | |
| **YLL**  **(N)** | **YLL (%)** | **Death (N)** | **Death (%)** | **YLL (Avg.)** | **YLL (N)** | | **YLL (%)** | **Death (N)** | **Death (%)** | **YLL (Avg.)** | |
| Lung | **Subclinical** | 74,803.3 | 51.5 | 4,255 | 49.6 | 17.6 | 539.9 | | 27.6 | 45 | 29.6 | 12.0 | |
| **Mild** | 50,301.3 | 34.6 | 3,058 | 35.7 | 16.4 | 1,008.8 | | 51.6 | 78 | 51.3 | 12.9 | |
| **Moderate** | 17,044.8 | 11.7 | 1,073 | 12.5 | 15.9 | 312.9 | | 16.0 | 25 | 16.4 | 12.5 | |
| **Severe** | 3,174.5 | 2.2 | 187 | 2.2 | 17.0 | 92.8 | | 4.7 | 4 | 2.6 | 23.2 | |
| Eye | **Subclinical** | 130,381.5 | 87.9 | 7,634 | 87.2 | 17.1 | 1,744.5 | | 87.2 | 133 | 85.8 | 13.1 | |
| **Mild** | 16,964.0 | 11.4 | 1,049 | 12.0 | 16.2 | 257.1 | | 12.8 | 22 | 14.2 | 11.7 | |
| **Moderate** | 497.4 | 0.3 | 33 | 0.4 | 15.1 | 0.0 | | 0.0 | 0 | 0.0 | - | |
| **Severe** | 542.5 | 0.4 | 34 | 0.4 | 16.0 | 0.0 | | 0.0 | 0 | 0.0 | - | |
| Skin | **Subclinical** | 132,574.0 | 89.8 | 7,791 | 89.5 | 17.0 | 1,674.4 | | 84.7 | 128 | 83.1 | 13.1 | |
| **Mild** | 13,146.4 | 8.9 | 792 | 9.1 | 16.6 | 221.4 | | 11.2 | 19 | 12.3 | 11.7 | |
| **Moderate** | 1,559.4 | 1.1 | 101 | 1.2 | 15.4 | 82.2 | | 4.2 | 7 | 4.5 | 11.7 | |
| **Severe** | 284.9 | 0.2 | 20 | 0.2 | 14.2 | 0.0 | | 0.0 | 0 | 0.0 | - | |

Supplementary Table S20: Years of Life Lost by Injury Severity using West Reference (3%, 1)

| Severity | Type | Coale-Demeny Model Life Table West  (Discount Rate = 3%, Age Weighting = 1) | | | | | | | | | | |
| --- | --- | --- | --- | --- | --- | --- | --- | --- | --- | --- | --- | --- |
| **Male** | | | | | | **Female** | | | | |
| **YLL**  **(N)** | **YLL (%)** | **Death (N)** | **Death (%)** | **YLL (Avg.)** | **YLL (N)** | | **YLL (%)** | **Death (N)** | **Death (%)** | **YLL (Avg.)** | |
| Lung | **Subclinical** | 63,325.9 | 52.7 | 4,255 | 49.6 | 14.9 | 380.3 | | 26.9 | 45 | 29.6 | 8.5 | |
| **Mild** | 40,583.8 | 33.8 | 3,058 | 35.7 | 13.3 | 727.5 | | 51.5 | 78 | 51.3 | 9.3 | |
| **Moderate** | 13,671.8 | 11.4 | 1,073 | 12.5 | 12.7 | 214.9 | | 15.2 | 25 | 16.4 | 8.6 | |
| **Severe** | 2,632.4 | 2.2 | 187 | 2.2 | 14.1 | 89.5 | | 6.3 | 4 | 2.6 | 22.4 | |
| Eye | **Subclinical** | 108,415.8 | 88.3 | 7,634 | 87.2 | 14.2 | 1,276.0 | | 88.4 | 133 | 85.8 | 9.6 | |
| **Mild** | 13,537.3 | 11.0 | 1,049 | 12.0 | 12.9 | 166.9 | | 11.6 | 22 | 14.2 | 7.6 | |
| **Moderate** | 386.5 | 0.3 | 33 | 0.4 | 11.7 | 0.0 | | 0.0 | 0 | 0.0 | - | |
| **Severe** | 423.1 | 0.3 | 34 | 0.4 | 12.4 | 0.0 | | 0.0 | 0 | 0.0 | - | |
| Skin | **Subclinical** | 109,741.8 | 89.9 | 7,791 | 89.5 | 14.1 | 1,232.8 | | 86.5 | 128 | 83.1 | 9.6 | |
| **Mild** | 10,870.0 | 8.9 | 792 | 9.1 | 13.7 | 140.0 | | 9.8 | 19 | 12.3 | 7.4 | |
| **Moderate** | 1,249.5 | 1.0 | 101 | 1.2 | 12.4 | 53.1 | | 3.7 | 7 | 4.5 | 7.6 | |
| **Severe** | 219.6 | 0.2 | 20 | 0.2 | 11.0 | 0.0 | | 0.0 | 0 | 0.0 | - | |

Supplementary Table S21: Years of Life Lost by Injury Severity using West Reference (6%, 0)

| Severity | Type | Coale-Demeny Model Life Table West  (Discount Rate = 6%, Age Weighting = 0) | | | | | | | | | | |
| --- | --- | --- | --- | --- | --- | --- | --- | --- | --- | --- | --- | --- |
| **Male** | | | | | | **Female** | | | | |
| **YLL**  **(N)** | **YLL (%)** | **Death (N)** | **Death (%)** | **YLL (Avg.)** | **YLL (N)** | | **YLL (%)** | **Death (N)** | **Death (%)** | **YLL (Avg.)** | |
| Lung | **Subclinical** | 53,071.7 | 50.9 | 4,255 | 49.6 | 12.5 | 409.0 | | 27.9 | 45 | 29.6 | 9.1 | |
| **Mild** | 36,467.0 | 35.0 | 3,058 | 35.7 | 11.9 | 757.2 | | 51.7 | 78 | 51.3 | 9.7 | |
| **Moderate** | 12,424.4 | 11.9 | 1,073 | 12.5 | 11.6 | 238.9 | | 16.3 | 25 | 16.4 | 9.6 | |
| **Severe** | 2,275.7 | 2.2 | 187 | 2.2 | 12.2 | 59.9 | | 4.1 | 4 | 2.6 | 15.0 | |
| Eye | **Subclinical** | 93,294.8 | 87.7 | 7,634 | 87.2 | 12.2 | 1,301.1 | | 86.7 | 133 | 85.8 | 9.8 | |
| **Mild** | 12,367.8 | 11.6 | 1,049 | 12.0 | 11.8 | 200.1 | | 13.3 | 22 | 14.2 | 9.1 | |
| **Moderate** | 367.5 | 0.3 | 33 | 0.4 | 11.1 | 0.0 | | 0.0 | 0 | 0.0 | - | |
| **Severe** | 399.4 | 0.4 | 34 | 0.4 | 11.7 | 0.0 | | 0.0 | 0 | 0.0 | - | |
| Skin | **Subclinical** | 95,053.8 | 89.8 | 7,791 | 89.5 | 12.2 | 1,246.4 | | 84.0 | 128 | 83.1 | 9.7 | |
| **Mild** | 9,436.4 | 8.9 | 792 | 9.1 | 11.9 | 174.4 | | 11.7 | 19 | 12.3 | 9.2 | |
| **Moderate** | 1,136.3 | 1.1 | 101 | 1.2 | 11.3 | 63.5 | | 4.3 | 7 | 4.5 | 9.1 | |
| **Severe** | 213.4 | 0.2 | 20 | 0.2 | 10.7 | 0.0 | | 0.0 | 0 | 0.0 | - | |

Supplementary Table S22: Years of Life Lost by Injury Severity using West Reference (6%, 1)

| Severity | Type | Coale-Demeny Model Life Table West  (Discount Rate = 6%, Age Weighting = 1) | | | | | | | | | | |
| --- | --- | --- | --- | --- | --- | --- | --- | --- | --- | --- | --- | --- |
| **Male** | | | | | | **Female** | | | | |
| **YLL**  **(N)** | **YLL (%)** | **Death (N)** | **Death (%)** | **YLL (Avg.)** | **YLL (N)** | | **YLL (%)** | **Death (N)** | **Death (%)** | **YLL (Avg.)** | |
| Lung | **Subclinical** | 46,398.8 | 52.2 | 4,255 | 49.6 | 10.9 | 289.6 | | 27.2 | 45 | 29.6 | 6.4 | |
| **Mild** | 30,260.5 | 34.1 | 3,058 | 35.7 | 9.9 | 548.8 | | 51.5 | 78 | 51.3 | 7.0 | |
| **Moderate** | 10,212.7 | 11.5 | 1,073 | 12.5 | 9.5 | 165.0 | | 15.5 | 25 | 16.4 | 6.6 | |
| **Severe** | 1,943.8 | 2.2 | 187 | 2.2 | 10.4 | 61.7 | | 5.8 | 4 | 2.6 | 15.4 | |
| Eye | **Subclinical** | 79,949.2 | 88.2 | 7,634 | 87.2 | 10.5 | 958.3 | | 88.0 | 133 | 85.8 | 7.2 | |
| **Mild** | 10,133.7 | 11.2 | 1,049 | 12.0 | 9.7 | 130.8 | | 12.0 | 22 | 14.2 | 5.9 | |
| **Moderate** | 292.0 | 0.3 | 33 | 0.4 | 8.8 | 0.0 | | 0.0 | 0 | 0.0 | - | |
| **Severe** | 319.6 | 0.4 | 34 | 0.4 | 9.4 | 0.0 | | 0.0 | 0 | 0.0 | - | |
| Skin | **Subclinical** | 81,060.7 | 89.9 | 7,791 | 89.5 | 10.4 | 923.8 | | 85.8 | 128 | 83.1 | 7.2 | |
| **Mild** | 8,031.3 | 8.9 | 792 | 9.1 | 10.1 | 110.9 | | 10.3 | 19 | 12.3 | 5.8 | |
| **Moderate** | 933.3 | 1.0 | 101 | 1.2 | 9.2 | 41.6 | | 3.9 | 7 | 4.5 | 5.9 | |
| **Severe** | 166.5 | 0.2 | 20 | 0.2 | 8.3 | 0.0 | | 0.0 | 0 | 0.0 | - | |

Supplementary Table S23: Years of Life Lost by Total Severity and Involved Organs using Iranian Reference (0%, 1)

| Variable | Type | Iranian Nationwide Life Table  (Discount Rate = 0%, Age Weighting = 1) | | | | | | | | | | |
| --- | --- | --- | --- | --- | --- | --- | --- | --- | --- | --- | --- | --- |
| **Male** | | | | | | **Female** | | | | |
| **YLL**  **(N)** | **YLL (%)** | **Death (N)** | **Death (%)** | **YLL (Avg.)** | **YLL**  **(N)** | | **YLL (%)** | **Death (N)** | **Death (%)** | **YLL (Avg.)** |
| Total Severity | **Subclinical** | 76,046.3 | 47.8 | 3,863 | 43.9 | 19.7 | 379.5 | | 21.1 | 38 | 24.4 | 10.0 |
| **Mild** | 61,047.8 | 38.4 | 3,585 | 40.7 | 17.0 | 984.4 | | 54.7 | 84 | 53.8 | 11.7 |
| **Moderate** | 17,952.9 | 11.3 | 1,128 | 12.8 | 15.9 | 302.6 | | 16.8 | 30 | 19.2 | 10.1 |
| **Severe** | 3,886.5 | 2.4 | 224 | 2.5 | 17.4 | 131.9 | | 7.3 | 4 | 2.6 | 33.0 |
| Involved Organs | **Subclinical/Mild** | 137,088.3 | 86.3 | 7,448 | 84.6 | 18.4 | 1,361.8 | | 75.8 | 122 | 78.2 | 11.2 |
| **Lung** | 19,109.8 | 12.0 | 1,175 | 13.4 | 16.3 | 376.3 | | 20.9 | 27 | 17.3 | 13.9 |
| **Skin** | 837.0 | 0.5 | 61 | 0.7 | 13.7 | 47.7 | | 2.7 | 5 | 3.2 | 9.5 |
| **Eye** | 402.0 | 0.3 | 28 | 0.3 | 14.4 | 0.0 | | 0.0 | 0 | 0.0 | - |
| **Lung/Skin** | 893.2 | 0.6 | 49 | 0.6 | 18.2 | 10.5 | | 0.6 | 2 | 1.3 | 5.3 |
| **Lung/Eye** | 479.2 | 0.3 | 28 | 0.3 | 17.1 | 0.0 | | 0.0 | 0 | 0.0 | - |
| **Skin/Eye** | 6.5 | 0.0 | 3 | 0.0 | 2.2 | 0.0 | | 0.0 | 0 | 0.0 | - |
| **Lung/Skin/Eye** | 114.1 | 0.1 | 8 | 0.1 | 14.3 | 0.0 | | 0.0 | 0 | 0.0 | - |

Supplementary Table S24: Years of Life Lost by Total Severity and Involved Organs using Iranian Reference (3%, 0)

| Variable | Type | Iranian Nationwide Life Table  (Discount Rate = 3%, Age Weighting = 0) | | | | | | | | | | | |
| --- | --- | --- | --- | --- | --- | --- | --- | --- | --- | --- | --- | --- | --- |
| **Male** | | | | | **Female** | | | | | | |
| **YLL**  **(N)** | **YLL (%)** | **Death (N)** | **Death (%)** | **YLL (Avg.)** | | **YLL**  **(N)** | **YLL (%)** | **Death (N)** | **Death (%)** | **YLL (Avg.)** |
| Total Severity | **Subclinical** | 60,708.0 | 45.9 | 3,863 | 43.9 | 15.7 | | 346.5 | 20.7 | 38 | 24.4 | 9.1 |
| **Mild** | 52,618.1 | 39.8 | 3,585 | 40.7 | 14.7 | | 938.7 | 56.1 | 84 | 53.8 | 11.2 |
| **Moderate** | 15,658.2 | 11.8 | 1,128 | 12.8 | 13.9 | | 304.8 | 18.2 | 30 | 19.2 | 10.2 |
| **Severe** | 3,286.2 | 2.5 | 224 | 2.5 | 14.7 | | 84.5 | 5.0 | 4 | 2.6 | 21.1 |
| Involved Organs | **Subclinical/Mild** | 113,328.9 | 85.7 | 7,448 | 84.6 | 15.2 | | 1,286.8 | 76.8 | 122 | 78.2 | 10.5 |
| **Lung** | 16,523.8 | 12.5 | 1,175 | 13.4 | 14.1 | | 324.6 | 19.4 | 27 | 17.3 | 12.0 |
| **Skin** | 769.3 | 0.6 | 61 | 0.7 | 12.6 | | 49.3 | 2.9 | 5 | 3.2 | 9.9 |
| **Eye** | 369.8 | 0.3 | 28 | 0.3 | 13.2 | | 0.0 | 0.0 | 0 | 0.0 | - |
| **Lung/Skin** | 734.7 | 0.6 | 49 | 0.6 | 15.0 | | 15.4 | 0.9 | 2 | 1.3 | 7.7 |
| **Lung/Eye** | 424.9 | 0.3 | 28 | 0.3 | 15.2 | | 0.0 | 0.0 | 0 | 0.0 | - |
| **Skin/Eye** | 12.9 | 0.0 | 3 | 0.0 | 4.3 | | 0.0 | 0.0 | 0 | 0.0 | - |
| **Lung/Skin/Eye** | 108.1 | 0.1 | 8 | 0.1 | 13.5 | | 0.0 | 0.0 | 0 | 0.0 | - |

Supplementary Table S25: Years of Life Lost by Total Severity and Involved Organs using Iranian Reference (3%, 1)

| Variable | Type | Iranian Nationwide Life Table  (Discount Rate = 3%, Age Weighting = 1) | | | | | | | | | | |
| --- | --- | --- | --- | --- | --- | --- | --- | --- | --- | --- | --- | --- |
| **Male** | | | | | | **Female** | | | | |
| **YLL**  **(N)** | **YLL (%)** | **Death (N)** | **Death (%)** | **YLL (Avg.)** | **YLL**  **(N)** | | **YLL (%)** | **Death (N)** | **Death (%)** | **YLL (Avg.)** |
| Total Severity | **Subclinical** | 53,837.4 | 47.2 | 3,863 | 43.9 | 13.9 | 268.6 | | 20.8 | 38 | 24.4 | 7.1 |
| **Mild** | 44,317.2 | 38.9 | 3,585 | 40.7 | 12.4 | 710.3 | | 55.1 | 84 | 53.8 | 8.5 |
| **Moderate** | 13,082.1 | 11.5 | 1,128 | 12.8 | 11.6 | 224.6 | | 17.4 | 30 | 19.2 | 7.5 |
| **Severe** | 2,805.5 | 2.5 | 224 | 2.5 | 12.5 | 85.1 | | 6.6 | 4 | 2.6 | 21.3 |
| Involved Organs | **Subclinical/Mild** | 98,152.0 | 86.1 | 7,448 | 84.6 | 13.2 | 977.7 | | 75.9 | 122 | 78.2 | 8.0 |
| **Lung** | 13,887.9 | 12.2 | 1,175 | 13.4 | 11.8 | 264.4 | | 20.5 | 27 | 17.3 | 9.8 |
| **Skin** | 618.9 | 0.5 | 61 | 0.7 | 10.1 | 36.3 | | 2.8 | 5 | 3.2 | 7.3 |
| **Eye** | 299.1 | 0.3 | 28 | 0.3 | 10.7 | 0.0 | | 0.0 | 0 | 0.0 | - |
| **Lung/Skin** | 639.8 | 0.6 | 49 | 0.6 | 13.1 | 9.0 | | 0.7 | 2 | 1.3 | 4.5 |
| **Lung/Eye** | 351.5 | 0.3 | 28 | 0.3 | 12.6 | 0.0 | | 0.0 | 0 | 0.0 | - |
| **Skin/Eye** | 6.0 | 0.0 | 3 | 0.0 | 2.0 | 0.0 | | 0.0 | 0 | 0.0 | - |
| **Lung/Skin/Eye** | 85.7 | 0.1 | 8 | 0.1 | 10.7 | 0.0 | | 0.0 | 0 | 0.0 | - |

Supplementary Table S26: Years of Life Lost by Total Severity and Involved Organs using Iranian Reference (6%, 0)

| Variable | Type | Iranian Nationwide Life Table  (Discount Rate = 6%, Age Weighting = 0) | | | | | | | | | | |
| --- | --- | --- | --- | --- | --- | --- | --- | --- | --- | --- | --- | --- |
| **Male** | | | | | | **Female** | | | | |
| **YLL**  **(N)** | **YLL (%)** | **Death (N)** | **Death (%)** | **YLL (Avg.)** | **YLL**  **(N)** | | **YLL (%)** | **Death (N)** | **Death (%)** | **YLL (Avg.)** |
| Total Severity | **Subclinical** | 44,800.7 | 45.4 | 3,863 | 43.9 | 11.6 | 265.1 | | 20.6 | 38 | 24.4 | 7.0 |
| **Mild** | 39,569.3 | 40.1 | 3,585 | 40.7 | 11.0 | 726.7 | | 56.4 | 84 | 53.8 | 8.7 |
| **Moderate** | 11,876.1 | 12.0 | 1,128 | 12.8 | 10.5 | 238.9 | | 18.6 | 30 | 19.2 | 8.0 |
| **Severe** | 2,467.6 | 2.5 | 224 | 2.5 | 11.0 | 57.0 | | 4.4 | 4 | 2.6 | 14.3 |
| Involved Organs | **Subclinical/Mild** | 84,373.8 | 85.5 | 7,448 | 84.6 | 11.3 | 994.7 | | 77.1 | 122 | 78.2 | 8.2 |
| **Lung** | 12,502.9 | 12.7 | 1,175 | 13.4 | 10.6 | 244.6 | | 18.9 | 27 | 17.3 | 9.1 |
| **Skin** | 592.4 | 0.6 | 61 | 0.7 | 9.7 | 38.0 | | 2.9 | 5 | 3.2 | 7.6 |
| **Eye** | 285.1 | 0.3 | 28 | 0.3 | 10.2 | 0.0 | | 0.0 | 0 | 0.0 | - |
| **Lung/Skin** | 546.3 | 0.6 | 49 | 0.6 | 11.1 | 13.4 | | 1.0 | 2 | 1.3 | 6.7 |
| **Lung/Eye** | 320.1 | 0.3 | 28 | 0.3 | 11.4 | 0.0 | | 0.0 | 0 | 0.0 | - |
| **Skin/Eye** | 12.0 | 0.0 | 3 | 0.0 | 4.0 | 0.0 | | 0.0 | 0 | 0.0 | - |
| **Lung/Skin/Eye** | 83.4 | 0.1 | 8 | 0.1 | 10.4 | 0.0 | | 0.0 | 0 | 0.0 | - |

Supplementary Table S27: Years of Life Lost by Total Severity and Involved Organs using Iranian Reference (6%, 1)

| Variable | Type | Iranian Nationwide Life Table  (Discount Rate = 6%, Age Weighting = 1) | | | | | | | | | | |
| --- | --- | --- | --- | --- | --- | --- | --- | --- | --- | --- | --- | --- |
| **Male** | | | | | **Female** | | | | | |
| **YLL**  **(N)** | **YLL (%)** | **Death (N)** | **Death (%)** | **YLL (Avg.)** | | **YLL**  **(N)** | **YLL (%)** | **Death (N)** | **Death (%)** | **YLL (Avg.)** |
| Total Severity | **Subclinical** | 40,527.2 | 46.8 | 3,863 | 43.9 | 10.5 | | 205.7 | 20.7 | 38 | 24.4 | 5.4 |
| **Mild** | 33,915.7 | 39.1 | 3,585 | 40.7 | 9.5 | | 549.2 | 55.4 | 84 | 53.8 | 6.5 |
| **Moderate** | 10,054.9 | 11.6 | 1,128 | 12.8 | 8.9 | | 176.4 | 17.8 | 30 | 19.2 | 5.9 |
| **Severe** | 2,141.1 | 2.5 | 224 | 2.5 | 9.6 | | 60.2 | 6.1 | 4 | 2.6 | 15.0 |
| Involved Organs | **Subclinical/Mild** | 74,441.4 | 85.9 | 7,448 | 84.6 | 10.0 | | 754.4 | 76.1 | 122 | 78.2 | 6.2 |
| **Lung** | 10,654.4 | 12.3 | 1,175 | 13.4 | 9.1 | | 200.2 | 20.2 | 27 | 17.3 | 7.4 |
| **Skin** | 481.0 | 0.6 | 61 | 0.7 | 7.9 | | 28.5 | 2.9 | 5 | 3.2 | 5.7 |
| **Eye** | 233.3 | 0.3 | 28 | 0.3 | 8.3 | | 0.0 | 0.0 | 0 | 0.0 | - |
| **Lung/Skin** | 485.1 | 0.6 | 49 | 0.6 | 9.9 | | 7.8 | 0.8 | 2 | 1.3 | 3.9 |
| **Lung/Eye** | 270.5 | 0.3 | 28 | 0.3 | 9.7 | | 0.0 | 0.0 | 0 | 0.0 | - |
| **Skin/Eye** | 5.6 | 0.0 | 3 | 0.0 | 1.9 | | 0.0 | 0.0 | 0 | 0.0 | - |
| **Lung/Skin/Eye** | 67.0 | 0.1 | 8 | 0.1 | 8.4 | | 0.0 | 0.0 | 0 | 0.0 | - |

Supplementary Table S28: Years of Life Lost by Total Severity and Involved Organs using West Reference (0%, 0)

| Variable | Type | Coale-Demeny Model Life Table West  (Discount Rate = 0%, Age Weighting = 0) | | | | | | | | | | |
| --- | --- | --- | --- | --- | --- | --- | --- | --- | --- | --- | --- | --- |
| **Male** | | | | | | **Female** | | | | |
| **YLL**  **(N)** | **YLL (%)** | **Death (N)** | **Death (%)** | **YLL (Avg.)** | **YLL**  **(N)** | | **YLL (%)** | **Death (N)** | **Death (%)** | **YLL (Avg.)** |
| Total Severity | **Subclinical** | 105,651.0 | 46.7 | 3,863 | 43.9 | 27.3 | 627.7 | | 21.5 | 38 | 24.4 | 16.5 |
| **Mild** | 88,399.4 | 39.1 | 3,585 | 40.7 | 24.7 | 1,604.2 | | 54.8 | 84 | 53.8 | 19.1 |
| **Moderate** | 26,381.6 | 11.7 | 1,128 | 12.8 | 23.4 | 527.8 | | 18.0 | 30 | 19.2 | 17.6 |
| **Severe** | 5,594.4 | 2.5 | 224 | 2.5 | 25.0 | 165.1 | | 5.6 | 4 | 2.6 | 41.3 |
| Involved Organs | **Subclinical/Mild** | 194,050.4 | 85.9 | 7,448 | 84.6 | 26.1 | 2,231.8 | | 76.3 | 122 | 78.2 | 18.3 |
| **Lung** | 27,938.7 | 12.4 | 1,175 | 13.4 | 23.8 | 581.3 | | 19.9 | 27 | 17.3 | 21.5 |
| **Skin** | 1,264.7 | 0.6 | 61 | 0.7 | 20.7 | 86.4 | | 3.0 | 5 | 3.2 | 17.3 |
| **Eye** | 614.8 | 0.3 | 28 | 0.3 | 22.0 | 0.0 | | 0.0 | 0 | 0.0 | - |
| **Lung/Skin** | 1,264.9 | 0.6 | 49 | 0.6 | 25.8 | 25.2 | | 0.9 | 2 | 1.3 | 12.6 |
| **Lung/Eye** | 700.9 | 0.3 | 28 | 0.3 | 25.0 | 0.0 | | 0.0 | 0 | 0.0 | - |
| **Skin/Eye** | 17.1 | 0.0 | 3 | 0.0 | 5.7 | 0.0 | | 0.0 | 0 | 0.0 | - |
| **Lung/Skin/Eye** | 174.8 | 0.1 | 8 | 0.1 | 21.9 | 0.0 | | 0.0 | 0 | 0.0 | - |

Supplementary Table S29: Years of Life Lost by Total Severity and Involved Organs using West Reference (0%, 1)

| Variable | Type | Coale-Demeny Model Life Table West  (Discount Rate = 0%, Age Weighting = 1) | | | | | | | | | | |
| --- | --- | --- | --- | --- | --- | --- | --- | --- | --- | --- | --- | --- |
| **Male** | | | | | | **Female** | | | | |
| **YLL**  **(N)** | **YLL (%)** | **Death (N)** | **Death (%)** | **YLL (Avg.)** | **YLL**  **(N)** | | **YLL (%)** | **Death (N)** | **Death (%)** | **YLL (Avg.)** |
| Total Severity | **Subclinical** | 86,082.2 | 47.8 | 3,863 | 43.9 | 22.3 | 445.6 | | 21.4 | 38 | 24.4 | 11.7 |
| **Mild** | 68,934.7 | 38.3 | 3,585 | 40.7 | 19.3 | 1,132.9 | | 54.4 | 84 | 53.8 | 13.5 |
| **Moderate** | 20,434.4 | 11.4 | 1,128 | 12.8 | 18.2 | 357.9 | | 17.2 | 30 | 19.2 | 11.9 |
| **Severe** | 4,417.0 | 2.5 | 224 | 2.5 | 19.7 | 146.1 | | 7.0 | 4 | 2.6 | 36.5 |
| Involved Organs | **Subclinical/Mild** | 155,273.2 | 86.2 | 7,448 | 84.6 | 20.8 | 1,578.4 | | 75.8 | 122 | 78.2 | 12.9 |
| **Lung** | 21,805.0 | 12.1 | 1,175 | 13.4 | 18.6 | 433.2 | | 20.8 | 27 | 17.3 | 16.0 |
| **Skin** | 953.0 | 0.5 | 61 | 0.7 | 15.6 | 57.0 | | 2.7 | 5 | 3.2 | 11.4 |
| **Eye** | 463.0 | 0.3 | 28 | 0.3 | 16.5 | 0.0 | | 0.0 | 0 | 0.0 | 0.0 |
| **Lung/Skin** | 1,013.5 | 0.6 | 49 | 0.6 | 20.7 | 13.9 | | 0.7 | 2 | 1.3 | 6.9 |
| **Lung/Eye** | 538.8 | 0.3 | 28 | 0.3 | 19.2 | 0.0 | | 0.0 | 0 | 0.0 | 0.0 |
| **Skin/Eye** | 7.8 | 0.0 | 3 | 0.0 | 2.6 | 0.0 | | 0.0 | 0 | 0.0 | 0.0 |
| **Lung/Skin/Eye** | 129.6 | 0.1 | 8 | 0.1 | 16.2 | 0.0 | | 0.0 | 0 | 0.0 | 0.0 |

Supplementary Table S30: Years of Life Lost by Total Severity and Involved Organs using West Reference (3%, 0)

| Variable | Type | Coale-Demeny Model Life Table West  (Discount Rate = 3%, Age Weighting = 0) | | | | | | | | | | |
| --- | --- | --- | --- | --- | --- | --- | --- | --- | --- | --- | --- | --- |
| **Male** | | | | | **Female** | | | | | |
| **YLL**  **(N)** | **YLL (%)** | **Death (N)** | **Death (%)** | **YLL (Avg.)** | | **YLL**  **(N)** | **YLL (%)** | **Death (N)** | **Death (%)** | **YLL (Avg.)** |
| Total Severity | **Subclinical** | 68,372.01 | 45.8 | 3,863 | 43.9 | 17.7 | | 434.0 | 21.6 | 38 | 24.4 | 11.4 |
| **Mild** | 59,299.2 | 39.7 | 3,585 | 40.7 | 16.5 | | 1,108.9 | 55.2 | 84 | 53.8 | 13.2 |
| **Moderate** | 17,813.8 | 11.9 | 1,128 | 12.8 | 15.8 | | 374.7 | 18.6 | 30 | 19.2 | 12.5 |
| **Severe** | 3,722.9 | 2.5 | 224 | 2.5 | 16.6 | | 92.8 | 4.6 | 4 | 2.6 | 23.2 |
| Involved Organs | **Subclinical/Mild** | 127,673.2 | 85.6 | 7,448 | 84.6 | 17.1 | | 1,543.0 | 76.8 | 122 | 78.2 | 12.6 |
| **Lung** | 18,790.1 | 12.6 | 1,175 | 13.4 | 16.0 | | 385.2 | 19.2 | 27 | 17.3 | 14.3 |
| **Skin** | 875.3 | 0.6 | 61 | 0.7 | 14.3 | | 61.8 | 3.1 | 5 | 3.2 | 12.4 |
| **Eye** | 425.8 | 0.3 | 28 | 0.3 | 15.2 | | 0.0 | 0.0 | 0 | 0.0 | - |
| **Lung/Skin** | 830.9 | 0.6 | 49 | 0.6 | 17.0 | | 20.4 | 1.0 | 2 | 1.3 | 10.2 |
| **Lung/Eye** | 476.2 | 0.3 | 28 | 0.3 | 17.0 | | 0.0 | 0.0 | 0 | 0.0 | - |
| **Skin/Eye** | 15.6 | 0.0 | 3 | 0.0 | 5.2 | | 0.0 | 0.0 | 0 | 0.0 | - |
| **Lung/Skin/Eye** | 122.3 | 0.1 | 8 | 0.1 | 15.3 | | 0.0 | 0.0 | 0 | 0.0 | - |

Supplementary Table S31: Years of Life Lost by Total Severity and Involved Organs using West Reference (3%, 1)

| Variable | Type | Coale-Demeny Model Life Table West  (Discount Rate = 3%, Age Weighting = 1) | | | | | | | | | | |
| --- | --- | --- | --- | --- | --- | --- | --- | --- | --- | --- | --- | --- |
| **Male** | | | | | | **Female** | | | | |
| **YLL**  **(N)** | **YLL (%)** | **Death (N)** | **Death (%)** | **YLL (Avg.)** | **YLL**  **(N)** | | **YLL (%)** | **Death (N)** | **Death (%)** | **YLL (Avg.)** |
| Total Severity | **Subclinical** | 58,126.8 | 47.1 | 3,863 | 43.9 | 15.0 | 309.5 | | 21.4 | 38 | 24.4 | 8.1 |
| **Mild** | 48,015.3 | 38.9 | 3,585 | 40.7 | 13.4 | 791.6 | | 54.7 | 84 | 53.8 | 9.4 |
| **Moderate** | 14,269.0 | 11.6 | 1,128 | 12.8 | 12.6 | 256.7 | | 17.7 | 30 | 19.2 | 8.6 |
| **Severe** | 3,047.3 | 2.4 | 224 | 2.5 | 13.6 | 89.5 | | 6.2 | 4 | 2.6 | 22.4 |
| Involved Organs | **Subclinical/Mild** | 106,140.8 | 86.0 | 7,448 | 84.6 | 14.3 | 1,101.1 | | 76.1 | 122 | 78.2 | 9.0 |
| **Lung** | 15,138.4 | 12.3 | 1,175 | 13.4 | 12.9 | 293.1 | | 20.3 | 27 | 17.3 | 10.9 |
| **Skin** | 676.0 | 0.5 | 61 | 0.7 | 11.1 | 41.8 | | 2.9 | 5 | 3.2 | 8.4 |
| **Eye** | 329.5 | 0.3 | 28 | 0.3 | 11.8 | 0.0 | | 0.0 | 0 | 0.0 | - |
| **Lung/Skin** | 692.7 | 0.6 | 49 | 0.6 | 14.1 | 11.3 | | 0.8 | 2 | 1.3 | 5.7 |
| **Lung/Eye** | 379.7 | 0.3 | 28 | 0.3 | 13.6 | 0.0 | | 0.0 | 0 | 0.0 | - |
| **Skin/Eye** | 7.1 | 0.0 | 3 | 0.0 | 2.4 | 0.0 | | 0.0 | 0 | 0.0 | - |
| **Lung/Skin/Eye** | 93.3 | 0.1 | 8 | 0.1 | 11.7 | 0.0 | | 0.0 | 0 | 0.0 | - |

Supplementary Table S32: Years of Life Lost by Total Severity and Involved Organs using West Reference (6%, 0)

| Variable | Type | Coale-Demeny Model Life Table West  (Discount Rate = 6%, Age Weighting = 0) | | | | | | | | | | |
| --- | --- | --- | --- | --- | --- | --- | --- | --- | --- | --- | --- | --- |
| **Male** | | | | | **Female** | | | | | |
| **YLL**  **(N)** | **YLL (%)** | **Death (N)** | **Death (%)** | **YLL (Avg.)** | | **YLL**  **(N)** | **YLL (%)** | **Death (N)** | **Death (%)** | **YLL (Avg.)** |
| Total Severity | **Subclinical** | 48,415.9 | 45.2 | 3,863 | 43.9 | 12.5 | | 328.8 | 21.8 | 38 | 24.4 | 8.7 |
| **Mild** | 42,917.4 | 40.1 | 3,585 | 40.7 | 12.0 | | 834.4 | 55.3 | 84 | 53.8 | 9.9 |
| **Moderate** | 12,994.6 | 12.1 | 1,128 | 12.8 | 11.5 | | 285.6 | 18.9 | 30 | 19.2 | 9.5 |
| **Severe** | 2,686.9 | 2.5 | 224 | 2.5 | 12.0 | | 59.9 | 4.0 | 4 | 2.6 | 15.0 |
| Involved Organs | **Subclinical/Mild** | 91,335.7 | 85.3 | 7,448 | 84.6 | 12.3 | | 1,163.4 | 77.1 | 122 | 78.2 | 9.5 |
| **Lung** | 13,669.8 | 12.8 | 1,175 | 13.4 | 11.6 | | 281.9 | 18.7 | 27 | 17.3 | 10.4 |
| **Skin** | 650.6 | 0.6 | 61 | 0.7 | 10.7 | | 46.6 | 3.1 | 5 | 3.2 | 9.3 |
| **Eye** | 315.7 | 0.3 | 28 | 0.3 | 11.3 | | 0.0 | 0.0 | 0 | 0.0 | - |
| **Lung/Skin** | 593.8 | 0.6 | 49 | 0.6 | 12.1 | | 16.9 | 1.1 | 2 | 1.3 | 8.4 |
| **Lung/Eye** | 346.0 | 0.3 | 28 | 0.3 | 12.4 | | 0.0 | 0.0 | 0 | 0.0 | - |
| **Skin/Eye** | 14.3 | 0.0 | 3 | 0.0 | 4.8 | | 0.0 | 0.0 | 0 | 0.0 | - |
| **Lung/Skin/Eye** | 90.8 | 0.1 | 8 | 0.1 | 11.4 | | 0.0 | 0.0 | 0 | 0.0 | - |

Supplementary Table S33: Years of Life Lost by Total Severity and Involved Organs using West Reference (6%, 1)

| Variable | Type | Coale-Demeny Model Life Table West  (Discount Rate = 6%, Age Weighting = 1) | | | | | | | | | | | |
| --- | --- | --- | --- | --- | --- | --- | --- | --- | --- | --- | --- | --- | --- |
| **Male** | | | | | | **Female** | | | | | |
| **YLL**  **(N)** | **YLL (%)** | **Death (N)** | **Death (%)** | **YLL (Avg.)** | **YLL**  **(N)** | | **YLL (%)** | **Death (N)** | **Death (%)** | **YLL (Avg.)** |
| Total Severity | **Subclinical** | 42,525.2 | 46.6 | 3,863 | 43.9 | 11.0 | 234.6 | | 21.5 | 38 | 24.4 | 6.2 |
| **Mild** | 35,755.1 | 39.2 | 3,585 | 40.7 | 10.0 | 599.6 | | 54.9 | 84 | 53.8 | 7.1 |
| **Moderate** | 10,663.4 | 11.7 | 1,128 | 12.8 | 9.5 | 197.1 | | 18.0 | 30 | 19.2 | 6.6 |
| **Severe** | 2,260.8 | 2.5 | 224 | 2.5 | 10.1 | 61.7 | | 5.6 | 4 | 2.6 | 15.4 |
| Involved Organs | **Subclinical/Mild** | 78,279.8 | 85.8 | 7,448 | 84.6 | 10.5 | 834.2 | | 76.3 | 122 | 78.2 | 6.8 |
| **Lung** | 11,290.4 | 12.4 | 1,175 | 13.4 | 9.6 | 217.2 | | 19.9 | 27 | 17.3 | 8.0 |
| **Skin** | 511.7 | 0.6 | 61 | 0.7 | 8.4 | 32.1 | | 2.9 | 5 | 3.2 | 6.4 |
| **Eye** | 249.5 | 0.3 | 28 | 0.3 | 8.9 | 0.0 | | 0.0 | 0 | 0.0 | - |
| **Lung/Skin** | 510.5 | 0.6 | 49 | 0.6 | 10.4 | 9.4 | | 0.9 | 2 | 1.3 | 4.7 |
| **Lung/Eye** | 284.5 | 0.3 | 28 | 0.3 | 10.2 | 0.0 | | 0.0 | 0 | 0.0 | - |
| **Skin/Eye** | 6.5 | 0.0 | 3 | 0.0 | 2.2 | 0.0 | | 0.0 | 0 | 0.0 | - |
| **Lung/Skin/Eye** | 71.0 | 0.1 | 8 | 0.1 | 8.9 | 0.0 | | 0.0 | 0 | 0.0 | - |
